# Supplementary material for: Grain albumin content is affected by 1BL/1RS translocation and alters the processing quality of wheat (Triticum aestivum L.)
Source: Front Plant Sci. 2024 Jul 22;15:1449826. doi: 10.3389/fpls.2024.1449826 (PMC11301643; doi:10.3389/fpls.2024.1449826)
Supplement: Supplementary file 2 [file DataSheet_2.xlsx]

## Sheet: S1
Dataset S1 Primers used in this study
Primer name	Primer sequence (5' → 3')	Description
1B01-F	ATGTAGCTGCGGGTAATCTC	Genetic analysis
1B01-R	AGGAGAGCTGGTAAAGTTCAG
1B52-F	TGAAAACACAAGCTTGGCAA
1B52-R	TGGAACTGTTGCTTCCAAAT
1B79-F	GTTAGCAATCCCCGTTCTCT
1B79-R	CAAGGTCAGAACAGAGCTCT
1B103-F	ATGAGCGTTTGTTGTCGAAG
1B103-R	GACGCTGCAGTTTTGTAGTC
1B128-F	CTCCGGTTACAATCACCTCA
1B128-R	ATGATGGATCAAGAGTGGCC
1B145-F	ACCAACTCAACATGCAAACA
1B145-R	GCTGATAAAGTAGTGCTCGC
Bam0213-F	ATGGATGCAAGACCAAAC	markers of wheat-rye 1BL/1RS chromosome translocation
Bam0213-R	CTATGAGAGGTAGAGCAGCC

## Sheet: S2
Dataset S2 The mean data of GAC of DH population in four and BLUP environments
DH	E1	E2	E3	E4	BLUP
DH1	2.33844	2.07859	2.35615	2.32504	2.24723
DH10	2.00133	1.60315	2.00234	1.79107	1.87153
DH100	1.85789	1.60561	1.9778	2.11117	1.90569
DH101	NA	2.39044	2.21034	2.57055	2.19324
DH102	2.07282	1.79504	2.09697	2.32222	2.068
DH103	2.15804	1.96604	2.33553	2.46076	2.20793
DH104	1.95884	1.66951	1.89335	1.96177	1.89045
DH106	1.60282	1.53492	1.91359	1.75536	1.74091
DH107	2.11687	2.03766	2.37128	2.32095	2.19166
DH108	1.61314	1.44019	1.98266	1.81424	1.75053
DH109	NA	NA	NA	NA	NA
DH11	2.19804	1.80282	2.11956	2.05503	2.04334
DH111	2.09143	1.79251	2.21726	2.09255	2.04738
DH113	2.10141	1.91821	2.23012	2.24414	2.11369
DH114	2.01884	1.75701	2.05927	2.10355	1.99102
DH115	1.82094	1.56259	1.94802	1.907	1.83939
DH116	2.01242	1.95338	2.09816	2.23821	2.07786
DH117	2.11384	1.6169	1.82739	1.80882	1.8647
DH118	2.0882	1.97075	2.23443	2.33037	2.13215
DH119	2.00852	1.73544	2.0555	1.96574	1.95637
DH12	2.23268	1.73104	1.98245	1.8887	1.96809
DH120	1.96394	1.7124	1.99256	2.1342	1.96107
DH121	2.10256	1.86618	2.20379	2.20618	2.08825
DH123	2.15231	1.78106	2.10598	2.24126	2.06657
DH124	1.78671	1.75165	2.03631	1.86751	1.88132
DH126	2.06319	1.67345	2.1723	2.03216	1.99156
DH127	2.28753	2.0114	2.28787	2.29459	2.19932
DH128	2.20009	1.7473	2.07119	2.0871	2.02792
DH129	2.13034	1.88023	2.32213	2.2549	2.13441
DH130	2.3388	1.82931	2.125	2.25885	2.12653
DH132	2.01102	1.94867	2.17962	2.21784	2.08349
DH133	NA	1.5868	1.82068	1.74895	1.77316
DH134	2.58139	1.60836	2.05697	2.27135	2.11904
DH135	2.25108	1.8339	2.1793	2.21455	2.11037
DH137	2.26048	1.83588	2.02059	1.99196	2.02864
DH138	2.32651	1.75585	2.06126	2.06644	2.05099
DH139	2.1844	1.88983	2.15075	2.17859	2.09374
DH14	2.15493	1.88172	2.26618	2.22803	2.12187
DH140	2.42347	1.88089	2.2251	2.09994	2.12873
DH144	2.3501	1.99968	2.37282	2.22976	2.215
DH145	2.21468	1.91428	2.21167	2.14228	2.11127
DH146	1.94662	1.65044	2.05035	1.84689	1.89284
DH147	2.43866	2.06231	2.3583	2.46764	2.29776
DH148	2.15168	1.8091	2.02881	2.16366	2.03843
DH149	2.8693	1.74286	2.10813	2.0572	2.06064
DH15	2.19442	1.83453	2.10844	2.16494	2.07137
DH150	2.01009	1.70504	2.03955	2.032	1.95744
DH151	2.275	2.00874	2.25981	2.31046	2.19327
DH152	2.17458	1.79259	2.14612	1.97834	2.01475
DH153	2.28144	1.80325	2.01621	2.00593	2.02818
DH154	2.04881	1.56963	1.89194	1.9184	1.88463
DH155	1.85741	1.81704	2.08818	2.03227	1.95925
DH156	2.16464	1.96014	2.26239	2.24251	2.1437
DH157	2.16565	1.82628	2.23193	2.00059	2.05417
DH158	2.17103	1.69572	2.06494	1.93837	1.96128
DH16	1.98303	1.74177	1.90849	2.07649	1.94045
DH17	2.10609	2.12286	2.2215	2.17442	2.14264
DH18	1.9222	1.8411	2.05407	1.97549	1.9588
DH19	1.93539	1.87177	2.01574	2.08378	1.99633
DH2	2.43679	2.18552	2.4852	2.41169	2.33607
DH20	2.41961	1.9421	2.12224	2.12115	2.11774
DH21	1.88441	1.73147	1.84847	1.82371	1.84483
DH22	1.86374	1.67376	2.00576	1.91322	1.89205
DH23	2.06161	1.78993	2.29087	2.091	2.05614
DH24	2.14898	2.1006	2.30614	2.23328	2.18806
DH25	NA	2.33109	2.69505	2.48159	2.44003
DH28	NA	1.67621	1.94901	1.91059	1.88076
DH29	1.56173	1.71802	1.97151	2.03416	1.84669
DH3	2.64791	1.92461	2.25878	2.05953	2.20141
DH30	1.68649	1.75307	1.99072	1.93591	1.87898
DH31	2.08281	1.94507	2.16789	2.12287	2.07498
DH32	1.93002	1.97055	2.08693	2.29618	2.06725
DH33	1.51107	1.72383	2.07406	2.04438	1.84066
DH34	1.82191	1.86903	2.26238	2.14962	2.02732
DH35	1.71386	1.84211	2.17929	1.85468	1.93171
DH37	1.88838	2.00025	2.25617	2.14919	2.06953
DH38	1.85959	1.93702	2.13747	1.96147	1.99302
DH4	2.17732	1.93961	2.06377	2.20179	2.08909
DH40	2.0745	2.0256	2.40379	2.06732	2.13078
DH42	2.11449	2.10793	2.38572	2.03453	2.14657
DH43	1.99103	1.87876	1.75773	1.96674	1.91492
DH45	2.18226	2.07748	2.06137	2.31088	2.14421
DH46	1.61607	1.63785	1.52049	1.81666	1.68816
DH47	1.976	1.72948	1.90869	2.05011	1.93039
DH48	2.06038	1.86499	1.9803	1.97802	1.98611
DH49	2.11254	2.07083	2.11257	2.1425	2.10144
DH5	2.4629	2.03722	2.28464	2.30165	2.24462
DH50	1.74015	1.73817	1.69687	1.8505	1.7893
DH51	NA	NA	NA	NA	NA
DH52	NA	NA	NA	NA	NA
DH53	1.70713	1.64479	1.8942	1.9956	1.84919
DH54	2.31575	2.07226	2.16684	2.22939	2.17785
DH55	1.78027	1.66766	1.88214	2.0082	1.85836
DH56	2.00342	1.8597	2.20651	2.27315	2.08031
DH57	1.87979	1.68582	1.99579	2.00753	1.90933
DH58	1.87169	1.89611	2.11724	2.37038	2.06101
DH59	2.29017	2.23877	2.54465	2.33336	2.31544
DH6	2.30401	1.92963	2.33182	2.3255	2.20143
DH60	2.01366	1.61513	1.77021	1.80406	1.82849
DH61	1.8023	1.72934	1.87902	1.94283	1.86173
DH63	NA	NA	NA	NA	NA
DH64	2.23958	2.03572	2.36776	2.17346	2.18498
DH65	2.15768	1.87832	2.13163	1.91067	2.02188
DH66	2.32729	2.19133	2.48714	2.35606	2.30547
DH67	2.42055	2.21205	2.49811	2.32819	2.32692
DH68	2.35326	2.01971	2.31815	2.15907	2.19242
DH69	1.80336	1.52999	1.90283	1.67897	1.76487
DH7	2.27205	2.05512	2.27472	2.18277	2.17794
DH71	2.0573	1.79212	2.01355	1.97572	1.96893
DH72	1.88626	1.63076	1.90262	1.91811	1.85825
DH73	1.87875	1.66439	1.90943	1.93298	1.86881
DH74	2.16002	2.06324	2.25267	2.30859	2.17791
DH75	2.17995	2.07241	2.29452	2.13884	2.15608
DH76	1.99587	1.8639	2.013	2.04356	1.98608
DH77	2.07241	1.88168	2.11424	1.98318	2.01595
DH78	1.8369	1.69077	2.0035	1.89994	1.88405
DH79	1.85348	1.66043	2.04641	1.69049	1.83973
DH8	2.5033	2.0461	2.45245	2.1865	2.26714
DH80	1.96894	2.14294	2.6074	2.18173	2.13269
DH81	1.80555	1.98481	2.26898	1.98594	2.0017
DH82	2.06559	2.32434	2.5557	2.35843	2.29271
DH83	1.94407	1.7712	2.01143	1.9567	1.93462
DH84	1.69335	1.75432	1.91548	1.89509	1.84068
DH85	1.63279	1.66716	1.86448	1.83982	1.78456
DH86	2.02009	1.96761	2.30092	2.16394	2.10457
DH87	1.57378	1.89359	1.94191	2.14276	1.90559
DH88	2.13045	1.87476	2.21299	2.17996	2.09255
DH89	1.90814	1.99059	2.22356	2.1702	2.0692
DH9	2.43572	2.26408	2.4506	2.14084	2.30643
DH90	1.79233	1.84758	2.03959	2.00845	1.93562
DH92	2.01784	2.12029	2.22655	2.29249	2.14977
DH93	2.23297	2.07476	2.31816	2.25718	2.19969
DH94	2.10499	1.99929	2.37027	2.30769	2.17741
DH95	1.78507	1.71384	2.07061	2.05956	1.92262
DH96	2.20172	2.18572	2.54434	2.34972	2.27467
DH97	2.263	2.04926	2.27117	2.38609	2.21879
DH98	1.8161	1.56481	1.92369	1.82213	1.81162
DH99	1.97786	1.86394	2.15623	2.1809	2.04411
E1, 2019–2020 Handan; E2, 2020–2021 Handan; E3, 2020–2021 Beijing; E4, 2020–2021 Qingdao.

## Sheet: S3
Dataset S3 The GAC of 136 non-1BL/1RS translocation materials versus 68 1BL/1RS translocation materials
Names	1B1R	GAC(%)
Jinan13	*	1.95954
Lumai23		2.0235
Tainong2419		1.86882
Youbaomai		1.92885
Xinong529	*	2.37311
Yanzhan4110		2.2568
Yunong201	*	2.24102
Lankaoaizao8		1.9837
Xinong3517		2.09741
Xinong9718		2.28346
Taifen3.3097F7		1.86141
TaiBalmegg.Di13F6		1.72811
Lai4671-1		1.85452
Lai4671-2		1.96719
Zhong349-1		2.10078
Zhong349-2		2.06314
Chunxiaomai		1.88361
Changzhi6406	*	2.23962
Sumai3		1.97414
Zhengyin4		1.9566
Nanda2419		1.91234
Nonglin10		1.99854
Lovrin 10(luofulin10)	*	1.99329
Aodesai3hao		1.97562
Bima4		1.73737
Fengchan3		2.10299
Bainong3217		1.76239
Pingyuan50		1.76795
Mazhamai		1.69971
Gejiaxiang		1.98131
Bendihuanghuamai		1.95097
Zhahong		2.36213
Motuo		1.88938
Wujiangzhuo		2.09176
Kangdingxiaomai		1.92056
Zangdong4		2.05939
Cs		1.95632
Rikaze8		1.91506
Yizhimai		2.02282
Fan6		2.12044
Xiaosanyuehuang		1.78199
Hongchunmai		1.92828
Hongjinbaoyin		1.8436
Yanzhan1		1.85444
Taishan4682	*	2.22383
Jiacha34		2.29421
Longzisuisui10		1.98844
Longzisuisui11		1.99464
Shannong21		2.03064
Chayazheda19		2.08517
Jiachazheda9		2.0216
Longzizheda19		2.15408
Jiachazheda37		1.84501
Sangrizheda6		2.01055
Chayu5		2.3581
Chayuzheda8		1.80861
Langxianzheda47		1.78056
Aikang58	*	2.24587
4332	*	2.01839
CB037	*	2.15382
Jimai47		1.91278
NZ26		2.188
TAA10		1.97425
Baibiansui		1.91882
Baihuomai		1.68289
Bainong207		2.10022
Beijing8		2.02187
Dabaimai		2.06634
Dalibanmang		1.91858
Enmai4		1.93953
France-1(Apache)		1.97975
Gao5	*	2.04249
Hesheng2	*	1.99889
Jimai20		1.67785
Xinong889		2.03632
Nongda6554	*	1.91843
Lankao906		2.08049
Laolaixia		1.92563
Liangxing99		1.93634
Lumai21		1.91728
Lumai22		2.23155
Lunxuan987	*	2.16327
Ningchun4		2.07269
Nongda3097		1.93382
Nongda3338	*	2.09859
Nongda3753		2.15775
Nongda3753tubianti		1.73317
Nongda5181	*	1.89642
Nongda981	*	2.24666
Shi4185	*	2.06344
Shijiazhuang54		1.74708
Taishan1		1.84501
Xishanbiansui		1.83904
Yumai8679	*	2.42053
Chang6878		2.17545
Zhengmai9023		2.05768
Zhongmai349		1.8298
Zhoumai16	*	2.19597
Zhoumai18	*	2.38347
Keyi5214		2.047
8762	*	2.42843
Nongda3672		1.77477
Baofeng104	*	2.38952
Luzi238	*	2.08252
s7D49		1.81805
lai4671		1.91799
291	*	1.98725
291S	*	2.30803
Jimai44		2.19737
Jimai229		1.93887
Xuezao		1.92448
Bima1		1.6224
Huangxiandalibanmang		2.06169
Jimai19		2.27219
Jinan16	*	1.79404
Laiyang4671		2.01216
Liangxing77		2.01248
Lumai11	*	2.3825
Lumai15	*	2.28428
Luteng1		1.81887
Shannong12		2.08122
Shannongyoumai3		1.7891
Taishan4		1.82419
Taishan5		2.09215
Taishan21		1.7751
Taishan22		2.07844
Taishan23		1.80857
Yuejin5		1.96573
Zimai12	*	1.94687
Yannong23	*	1.9064
Bonong6		1.9951
Dehongfumai8		2.17567
Fengwu981		2.10081
Junda129	*	2.58306
Kenong2009		1.88158
Lankao198		1.69002
Luomai24	*	1.96869
Luomai31	*	2.29868
Pingan7		1.96721
Pingan8		2.38742
Pingan9	*	2.06066
Puxing5	*	2.0851
Qimai2	*	2.08318
Tianhe3	*	2.32308
Tianmin198		1.814
Tianmin298	*	2.38213
Xinmai208	*	2.34777
Xinmai26		1.70411
Yimai6	*	2.19928
Zhengnong17	*	2.16385
Zhengnong46	*	2.03197
Zhengpinmai8	*	2.00166
Zhongyu1123	*	2.51574
Zhongyu6		1.96451
Zhongyu8	*	2.02187
Zhongyuanmai		1.82319
Zhoumai17	*	2.359
Zhoumai19		1.74594
Zhoumai22	*	2.17904
Zhoumai23	*	2.05733
Zhoumai25	*	2.16684
Zhoumai26	*	2.1595
Zhoumai27	*	2.08787
Zhoumai30	*	2.01096
Zhoumai32	*	2.02051
Luohan7		2.01453
Linfen5064		1.97401
Yunhan805		1.89894
Yunhan20410	*	1.91551
Yaomai16		1.67254
Han6172		1.94553
Heng4399		1.89252
Heng6632	*	1.82605
Hengguan35	*	2.35154
Jinhe9123	*	2.43404
Shimai15	*	2.07785
Shixin633	*	1.91632
Shijiazhuang9	*	1.99103
Beijing0045		1.90323
Nongda179		1.91372
Nongda413		1.6496
Nongda3432	*	2.19864
Zhongmai875	*	1.90323
Zhongyou206		1.84333
Qinnong142		1.8556
Shan627	*	2.07789
Wunong6		2.12664
Xinong556	*	2.35656
Xinong558	*	2.20089
Xinong822		1.84551
Xinong2208	*	1.95746
Xinong9872	*	2.12046
Kavkaz	*	2.02483
Chixiaomai		1.78324
Wangshuibai		1.94047
Triumph		1.86632
04luo7427		1.89996
Wenmai6		1.89089
Anhui3		2.13218
Neixiang5		1.98525
Nongda753		2.17214
Shiluan02-1		1.99869
954072		1.97017
Taikemai33		2.05669

## Sheet: S4
Dataset S4 ER upregulated expression proteins relative to Pavon76
Protein_ID	Gene ID	Protein_Description	Fold change_ER-VS-PR	Pvalue_ER-VS-PR	Protein_Sequence
tr|A0A3B6MNA8|A0A3B6MNA8_WHEAT	TraesCS5D02G159000	Uncharacterized protein OS=Triticum aestivum OX=4565 PE=4 SV=1	1.61363	3.270785e-05	MAAAAAAKSDDEDNYEEYVPVAKRRAMEADRFRHQRLPKPAVPSLPPPPPPPTNNSAPGPAAKPSLLVTSTLRKRTAPEITPTERLIQEEQKIAEEASYRTTLKPVGEIAKDITYTEPLRTGWKPPLWLRRMPRQKADELRRKWHILVEGEEVPPAARNFWDLRFPEPISRMLREKGIVQPTPIQVQGLPVALSGRDMIGFAFTGSGKTLVFVLPLIMVALQEEMLMPIVPGEGPFGMIICPSRELAKQTYDVIDMFLSPLKQAGFPEIRPLLCIGGVDMRTQLDVVRKGVHIVVATPGRLKDLLAKKMNLDNCRYVTLDEADRLVDLGFEDDIREVLNHFKVKDNFKAPRQTLLFSATMPKKIQNFAMSALVKPVVVNVGRAGAANLDVIQEVEYVKE…
tr|A0A3B6LLJ2|A0A3B6LLJ2_WHEAT	TraesCS5B02G236600	Alpha-amylase OS=Triticum aestivum OX=4565 PE=3 SV=1	1.50175	3.56385e-05	MGRQVAALCGLLVVLLRLTSGVNAQTEILFQGFNWDSWSKQGGWYNMLKAQVGDIAGAGVTHVWLPPPTHSVSSQGYMPGRLYDLDASKYGTAVELRSLIAAFGAKGIKCVADIVINHRCAEDKDGRGIYCIFKGGGPEGLLDWGPGMICSDDTKFSDGTGHRDTGADFAAAPDIDHLNPRVQKELSDWLNWLKSDLGFDGWRLDFAKGYSADVARTYVQNTSPGFVVAEIWNSLSYDGDGKPAVNQDGERQELVNWAKAVGGPAMAFDFTTKGILQSAVQGELWRMRDKEGNAPGMIGLLPEKAVTFVDNHDTGSSQKKWPFPADKVMMGYAYILTHPGVPCIFYDHVFDWNLKQEINALAAVRNRNGINAGSKLRILAAESDMYVATVDEKVIVKLG…
tr|A0A3B5Y1W9|A0A3B5Y1W9_WHEAT	TraesCS1A02G253200	Pyruvate, phosphate dikinase OS=Triticum aestivum OX=4565 PE=3 SV=1	1.52162	9.427272e-07	MAPAQCARVQRVFHFGKGKSEGNKAMKDLLGGKGANLAEMASIGLSVPPGFTVSTEACQQYQAAGRALPPGLWEETLEGLRWVEEYMGARLGDPARPLLLSVRSGAAVSMPGMMDTVLNLGLNDEVAAGLAAKSGDRFAYDSYRRFLDMFGNVVMDIPHALFEEKLEAMKATKGVDNDTDLIANDLRELVGQYKNVYVEAKGEQFPSDPKRQLQLAVLAVFDSWDSPRANKYRSINQITGLRGTAVNVQCMVFGNMGNTSGTGVLFTRNPSTGEKKLYGEFLVNAQGEDVVAGIRTPEDLDAMRDHMPEAYAELVENCDILESHYKEMMDIEFTVQENRLWMLQCRSGKRTGTGAVKIAVDMVNEALVDRNTAIKMVEPGHLDQLLHPQFANPEAASYK…
tr|A0A3B6PL02|A0A3B6PL02_WHEAT	TraesCS6B02G256900	Ribosomal_L14e domain-containing protein OS=Triticum aestivum OX=4565 PE=3 SV=1	1.69387	0.000330279	MPFKRFVEIGRVALVNYGKDYGRLVVIVDVVDQNRALVDAPDMVRCQMNFKRLSLTDIKIDIKRIPKKATLIKAMEEADVKTKWENSSWGKKLVVQKRRASLNDFDRFKVMLAKIKRGGAIRQELAKLKEVAA
tr|A0A159KHX4|A0A159KHX4_WHEAT	TraesCS1B02G041928	Omega-secalin OS=Triticum aestivum OX=4565 PE=4 SV=1	3.39774	1.54569e-10	MKTFLIFVLAMTMSIITTARQLNPSEQELQSPQQLVPKEQSYPQQPYPSHQPFPTPQQYSPYQPQQPFPQPQQPTPIQPQQPFTQQPQQAFPQPQQQLPLQPQQSFPQPQQPIPQQPQQSFPQQPQRPSCVTPSYTSSNMRIKERKFLSQGHCW
tr|A0A3B5Y1D6|A0A3B5Y1D6_WHEAT	TraesCS1A02G237200	CW-type domain-containing protein OS=Triticum aestivum OX=4565 PE=4 SV=1	2.19495	1.434191e-07	MDIITENVGGNPSGMPKRKMKISSLQTAPSGKKLKVKAHKQLSNGITRKSHGEDKSVKPEKETVSSGETDNGRSDGVNDGDHKISHLNFDRSAPVPSACMTGAMESSVAVPVEPVLINEQWVCCDKCEKWRLLPYWMNPDILPKKWRCNMQSWLHGMNNCKISEDETTKALRAMPPAPENNISVDVCHDIATSGVCAATIPPTIQGDIKSIATSGTLKVDSSANTSNNLKMGEMSKSSKKLEAPTSRNPDDVDCFPKQKGKRKHIGSSDDGETVAVDRLHPESKSSRVGFDHDSLRASKKMNKEPNEPAKHHPSEFEISKSSPSVKGTPKSLHRYSGVSPSTGKYGSSSLVKCNDDKIISNGGIRTSDVGRSDVPELSIKNRKSKQRQLSKRGPDPIVS…
tr|A0A3B6AXC2|A0A3B6AXC2_WHEAT	TraesCS2A02G214700	Histone H2A OS=Triticum aestivum OX=4565 PE=3 SV=1	2.0814	7.79415e-08	MAGRGKAIGTGAAKKATSRSSKAGLQFPVGRIARFLKAGKYAERVGAGAPVYLAAVLEYLAAEVLELAGNAARDNKKTRIVPRHIQLAVRNDEELTKLLGGATIASGGVMPNIHQHLLPKKASSSKASTVDDDDN
tr|A0A3B6KNZ3|A0A3B6KNZ3_WHEAT	TraesCS5A02G370300	Choline transporter-like protein OS=Triticum aestivum OX=4565 PE=3 SV=1	1.87162	0.00226647	MGYWNNFWGIISKVPLEIEEQVYSPVYGNIAVRDSRGCCSGFTASFTKILFIMHLIAFIALTIFLGVQASSHPNPTYKPFAHFIPLASSVILSIIAACFWTILAVTNPAKAIKTSLWTAPVSALGCDVVILLVGDGEALGIGVLIVVIAIAAALYSCWATGPRLQHAAAVLSTSVNGAHLPFSASCLVLFVVLAAFGYMAFWTVAISCISAAEGHFMDFHIVYVAALLVSISWTMQVLRYFVYVAVARLAHAALAYGVRMPGGAVEAFCGTMSGPAFGDICMGAVLVPVIAAVRSFARAINALSGGNDEFLFSCCQGCCLTVSEKLMGRVNRWGFVHVGARGKAFCVASRDVWSLFVLRGMAKLVDSDLTGSFCFLSAVTGGALASLVAGSWALAMDRD…
tr|A0A3B6C366|A0A3B6C366_WHEAT	TraesCS2B02G214100	SUMO-activating enzyme subunit OS=Triticum aestivum OX=4565 PE=3 SV=1	1.59587	6.55777e-08	MASAAAPASASSEEAVKAAKVLMVGAGGIGCELLKTLALSGFSDIHVIDLDTIEVSNLNRQFLFRKSHVGQSKAHVARDAILKFRPNINIKSHHANVKDAQFNVDFFKQFNVVLNGLDNLDARRHVNRLCLAAEVPLVESGTTGFLGQVTVHVKGKTECYECQPKPIPKSYPVCTITSTPSKFVHCIVWAKELLFAKLFGDKNQDNDLNVHSKDGSSSKLDVFERDIDEDLDQYAQRIYDHVFGYNIEVALENEETWKNRRRPNPVYIRDTLPEAVKQNGSSRDCSNDHEEPSAMASLGLTNPQEIWTLAENSRVLLEAFKLFFEKREKEIGNLVFDKDDQLAVEFVTAAANIRAHSFGIPLHSLFEAKGVAGNIVHAVATTNAIIAGLIVIEAIKVLR…
tr|A0A3B6PLK4|A0A3B6PLK4_WHEAT	TraesCS6B02G190100	Uncharacterized protein OS=Triticum aestivum OX=4565 PE=4 SV=1	1.56206	7.602528e-05	MADPPSLASTATPQPDQLATSASIPQNANPQIPLPPIVSSAQVNPGSAATGGRSTDPPQLQAPSPTQAAEGAGGFGAIHRSGPASLAPTVGQPPRYATVGTTYGTQMAFPGGGGQLGQQPGLRAAMFGQGQPRMLQGQGNAASAAQYGLQFQPTMMAQPGQRGVVQGVQFNTPTAQAQSMGASLMNQMRPNGIATPYGAQTQQRSAYHAQMRPQQPPGSSQNGPVVQMLPTHQMQSSMASAVSPHQRQQEQMMQLIQQLQQRGLNRQQIAQALQRLPHLNAQHLNQQQRQQQQASPRMPASAAGKPANTAGLQPATPSSGGTAAGANAPHQGGGNCSQLLGKRKIHDLVAQVDPLCEACKAQEIIGCGSQGCATAPAEELSPVRSWFLTGEDVNESAEK…
tr|A0A3B6KK71|A0A3B6KK71_WHEAT	TraesCS5A02G335200	PCI domain-containing protein OS=Triticum aestivum OX=4565 PE=3 SV=1	1.51034	3.342769e-06	MPEDVEMNDSAQPAPVAAPAAADAPAPAPALSTLQHLKEIASVVEAGSLTKEVRRISRAVRLTVALRRRLAAPDVAAFLAFALPASSEAFTRLSPLLPKEDGSEMDVDAAAPAAQVSIKHGLPEIEIYCYLLVLIFLIDHKKYDEAKACANSSIARLKNLNRRTVDVLASRLYSYYSYVHELTNSLAEIRGTLLGLHRMATLHHDELGQETLLNLLLRNYLHYNLYDQAEKLRSKAPRFEAHSNQQFCRYLFYLGKIRTIQLEYTDAKESLLQAARKAPTAARGFRIQCNKWAILVRLLLGEIPERTVFMQKGMKAALTPYFELTNAVRVGDLEVFRAVAEKFGSIFSADRTSNLIVRLRHNVIRTGLRNISISYSRISLADIAKKLRLDTKTAVADAE…
tr|L0GDQ5|L0GDQ5_WHEAT	TraesCS3A02G055600	14-3-3 protein OS=Triticum aestivum OX=4565 GN=14R1 PE=2 SV=1	1.55907	8.488014e-07	MAQPAELSREENVYMAKLAEQAERYEEMVEFMEKVAKTVDSEELTVEERNLLSVAYKNVIGARRASWRIISSIEQKEESRGNEDRVTLIKDYRGKIEVELTKICDGILKLLDSHLVPSSTAPESKVFYLKMKGDYYRYLAEFKSGTERKDAAENTMVAYKAAQEIALKELPPTHPIRLGLALNFSVFYYEILNSPDRACDLAKQAFDEAISELDSLSEESYKDSTLIMQLLRDNLTLWTSDISEDAAEEMKDAPKGESGDGQ
tr|A0A3B6MQX4|A0A3B6MQX4_WHEAT	TraesCS5D02G191100	Cysteine desulfurase OS=Triticum aestivum OX=4565 PE=3 SV=1	1.50978	3.922864e-05	MHFYRDRRRHVITTQTEHKCVLDSCRYLQQEGFEVTYLPVRPDGLIDVAQLADAIRPDTGLVSVMAVNNEIGVVQPLEEIGRICREKGVPFHTDAAQALGKIPIDVNQMGIGLMSLSAHKIYGPKGVGALYLRRRPRIRVEPQMSGGGQERGIRSGTVPTPIVVGFGAACEIAAKEMDYDERRVSALQQRLLDGIRSKVDDVVINGSMEHRYAGNLNLSFAYVEGESLLMGLKEVAVSSGSACTSASLEPSYVLRALGVDEDMAHTSIRFGIGRFTTEEEVDRATELTVHQVLKLREMSPLYEMAKAGIDIKSIQWSQH
tr|A0A3B6AYW6|A0A3B6AYW6_WHEAT	TraesCS2A02G303400	GrpE protein homolog OS=Triticum aestivum OX=4565 PE=3 SV=1	1.68553	4.876791e-07	MAATYCAYPAAAAAAAANPTRRRLQTLTAPGALPAARKPSRQPPTFLSFRLPNAALPPLRVAGADPQVVNGEDFPPMNDLIRLYKKAFLDGNEDVVSDIEKAITSMEEERSKSASQFESITAEIASGKNKFLRLNADLENFRKQTEKDRAKFTSNIQVELVQSLLPLVDSFEKTNVEITLETEKEQKISASYQGIYKQLVETLKNLGVGVVETVGKPFDPVVHEAIAREESTEFKAGIVSHEVHRGFLLRERVLRPAAVKVSNGPGDQNVSSTSSEEPVEDTKEDAAV
tr|A0A3B6QB45|A0A3B6QB45_WHEAT	TraesCS6D02G090400	Uncharacterized protein OS=Triticum aestivum OX=4565 PE=3 SV=1	1.74944	3.704685e-06	MMGGRAVLLLLVISALFAQIHASDPLFHESFNESFDGSWIVSGKEEYKGVWKHAKSDGHEDYGLLVSEPARKYAIIKELDYLVTLKGETVVLQFEVRLQNGLECGGAYIKYIRPQATGWNAKDFDNDTPYTIMFGPDKCGSTNKVHFILKHKNPKTGKYVEHHIKSPPSVPYDKLSHVYTAILKPDNEVRILVDGVEKSKANFLSADDFEPALVPSKTIPDPDDKKPEDWDERAKIPDPVAVKPDDWDEDAPMEIVDEEATKPEGWLDDDPEEIDDPEAAKPEDWDDEEDGEWEAPKMDNPKCEVAPGCGEWKKPMKDNPAYKGKWHAPLIDNPNYKGIWKPQEIPNPEYFELDKPDFDPIAAIGIEIWTMQDGILFDNILIADNEKVATSVREKTWKP…
tr|W5A761|W5A761_WHEAT	TraesCS1D02G260000	Uncharacterized protein OS=Triticum aestivum OX=4565 PE=4 SV=1	1.73386	4.204048e-09	MESSEPLQDIMCEFRAGKMSLEGTRVVPDTRKGLVRIGKGEEGLIHFQWLDRGQNIVEDDQIVFPDEAVFEKVTESSGRVYILKFRHDSRKFFLWMQETNADGDSQICRQVNAYINRPLDGDAISIEAEMSHEDTADDDISSRAGNLVDQSMTADMAGEVTSAAGPVRLADLQRILSSIQPSDATADPDAGLRLGDILKPDLILPLIETLPIEQLASHLPEGSWTAGDILELLQSPPLRQQLDAFTHVLQTGQIDLAQFGVDPSKYKFTVASFLEALEDSVAKASTDGGNDSKAKKDGGNDPMDES
tr|A0A3B6C7G7|A0A3B6C7G7_WHEAT	TraesCS2B02G320000	GrpE protein homolog OS=Triticum aestivum OX=4565 PE=3 SV=1	2.09351	1.877237e-08	MAATYCAYPAASAAAANPTRRHLQTLTAPGALPAARKPSRQAPTFLSFRRPNAALRPLRVAGADPQIVNGEDFPPMNDLIRLYKKAFLDGNDDVVSDIEKAITSMEEERSKAASQLESITAEIASGKNKFLRLNADLENFRKQAEKDRAKFTSNIQVELVQNLLPLVDSFEKTNVEVTLETEKEQKISTSYQGIYKQLVETLKSLGVGVVETVGKPFDPVVHEAIAREESTEFKAGIVSHEVHRGFLLRERVLRPAAVKVSTGPGDQIAGATSSEEPVEDTKEDAAV
tr|A0A3B6TRP9|A0A3B6TRP9_WHEAT	TraesCS7D02G292400	14_3_3 domain-containing protein OS=Triticum aestivum OX=4565 PE=3 SV=1	1.56875	2.522007e-07	MATAAAAGTREEMVYMAKLAEQAERYEEMVEFMEKVVAAAGTGELTVEERNLLSVAYKNVIGARRASWRIVSSIEQKEEGRGAAGHAAAARGYRALVEAELSNICAGILRLLDERLVPAAVAVDAKVFYLKMKGDYHRYLAEFKSAAERKDAADSTLGAYQAAQDIAMKELPPTHPIRLGLALNFSVFYYEILNSPDRACSLAKQAFDEAIAELDSLGEDSYKDSTLIMQLLRDNLTLWTSDMQDDAGDEMRDSSKPEDEQ
tr|L7R666|L7R666_WHEAT	TraesCS1D02G001100	Gamma-gliadin OS=Triticum aestivum OX=4565 PE=4 SV=1	1.64021	8.622586e-09	MKTFLILTILAMATTIATANMQVGSSGQVEWPQHQQLPQPQQPLYHQPQQIFPQPRQTFPHLPQQTFPQPQQTIPHQPQQQFPQTQQPLQPFPQPQQTFPQQPQQPLPQPQQPQQPFPQSQQPQQPFPQPQQQFPQPQQPQQSIPQQQQPLIRSSLQQQMNPCKNFLLQQCNPVSLVSSLVSLIFPRSDCQVMQLQCCQQLAQIPQQLQCAAIHSVVHSIMMQQEQQQPQQLAHLEVIRSLVLKTLQTVCNVYVRPDCSTIRTPFASTVAGIGGQ
tr|A0A3B6AYJ7|A0A3B6AYJ7_WHEAT	TraesCS2A02G243500	Small nuclear ribonucleoprotein-associated protein OS=Triticum aestivum OX=4565 PE=3 SV=1	1.86826	3.269878e-08	MSNPKGSKMLQFVNYRMRVTIQDGRQLVGKFMAFDRHMNLVLGDCEEFRKLPPSKSSKTTGEREERRTLGLLLLRGEEVVSMTVEGPPPPDESRAKASGGGGALSGTGVGRAAGRGVATGPLLQAQPGLSGPVRGVGGPAPGMMQPQISRPPMPNLSAPPVAYPQVVRPPPMGMPPMRPGGPPPMQMQFQRPPGPPPAPYPGGPPQQFMRGPPPMGPPPGRPGMPGMPPPPGMRPMPPLQFGQPPRHGMPPPPPGPQQPGQNPQQ
tr|A0A3B6GQJ6|A0A3B6GQJ6_WHEAT	TraesCS3D02G161300	Eukaryotic translation initiation factor 3 subunit L OS=Triticum aestivum OX=4565 PE=3 SV=1	1.61546	6.49664e-07	MASAYDREDGLAPPQPHGGGPADAYDPNYVPDSVKTFVVHLYRHIRDKNVYEIHQMYEGGFQRLSDRLFRDTPWPSAEAVAPYCDGDHVFLLLYRELWYRHAYARLSPLTASHRSESWNNYCDLFSVVLHGVVNMQLPNQWLWDMVDEFVYQFQSFCQYRAKLKNKTEDELQQLKQFDKAWNVYGVLNYLQALVEKSMIAQILEREKEGLESFTATDGYDYQGGSNVLKVLGYYSMIGLLRIHCLLGDYHTGLKCLAPINLNQQGVYTIVIGSHISTIYHYGFANLMMRRYVDATKEFNKILLYIIKYKQYHQKSPQYDQILKKNEQMYALLAICLSLCPQNKLIDENVSTQLKEKYNDKMTKMQRFDDEAYAAYDELFSYACPKFITPSPPVLDQPLT…
tr|A0A3B6RF89|A0A3B6RF89_WHEAT	TraesCS7A02G283900	Uncharacterized protein OS=Triticum aestivum OX=4565 PE=4 SV=1	3.93596	2.547174e-08	MGKLMKAFGKGTSAACVEDCEDSDGDPFVPNDFVEDDPFQASEESHMDDPDLEKALYEFYVSHKVNCLKRKITNAGARNVKRKRSSDFPVAITFTRYSGKLFSTVIEIQFRKKFILIPKYVKHDILDLPIDGEPIMSDAEAGREFILSHFNVTSIPSVSFFYNTLKSEELPDEDIFICFMCISLSTFLCPNSSLSPSPKYLHIFRYCSSVMNYDLSRLVYESLLGNIKKFKDSMKVASMRSMTFGGCHYAFAVDFTV
tr|A0A3B6EAD8|A0A3B6EAD8_WHEAT	TraesCS3A02G003800	Uncharacterized protein OS=Triticum aestivum OX=4565 PE=3 SV=1	1.66519	4.388858e-10	MAPPPSTSAPDGGLDPRDVCVVGVARTPIGALLGSLSSLPATRLGSVAIQGALRRASVDPALVQEVFMGNVLSANLGQAPARQAALGAGLPNTVPCTTVNKVCSSGMKAVMLAVQSIQLGINDVVVAGGMESMSNAPKYAATARRGSRFGHDVLIDGMLKDGLWDVYNDFHMGMCAELCADQHSITREEQDAYAVQSNELGLAARDSGAFDWEIVPVEIPSGRGRPPVVVDKDESLAKYDPVKLKKLGPAFKKNGSVTAGNSSSISDGAAAIVLVSGEKAKNLGLQVIARIRGYADAAQAPELFTTTPALAIPKAISNSGLRDSQIDYYEINEAFSVVAVANQRLLGISPGKLNISGGAVSLGHPIGCSGARIIVTLLGILRQKQGKFGVAGVCNGGGG…
tr|D0PRB6|D0PRB6_WHEAT	TraesCS3A02G254600	Dehydrin OS=Triticum aestivum OX=4565 PE=2 SV=1	1.76189	0.000126083	MADYGGEYGHPYPRVDEYGNPVPPVDQYGNPIPREPGQVPAYTSGGAAPPYSSDGAGAVTSADYGAGVTPGYGLSGAVHPQESVVGGAVFPSGTAHTHEGALSGSLAPGETTAYAYEGMVGSGIGTGDQIQPTKEGHTTLGETLRRSSSSSSSSSSEDDGQGGRQRKKKSMKAKIKEKLPGSHKQEEHKAGHTVPPAGTGTHEKIKEKLPGHH
tr|A0A077RXS4|A0A077RXS4_WHEAT	TraesCS3B02G457100	AAA domain-containing protein OS=Triticum aestivum OX=4565 GN=TRAES_3BF045700010CFD_c1 PE=3 SV=1	2.49724	1.647278e-09	MSSSPTPAPDAGAAAMAVDDSSETDQLDSMSTEDIVRATRLLDNEVRVLKDELQRNNLELENVKDKIKENQEKIKLNKQLPYLVGNIVEILEMNPEDEAEEDGANIDLDSQRKGKCVVLKTSTRQTIFLPVIGLVDPDNLKPGDLVGVNKDSYLILDTLPSEYDSRVKAMEVDEKPTEDYNDIGGLEKEIQELVEAIVLPMTHKEQFQKLGIRPPKGVLLYGPPGTGKTLMARACAAQTNATFLKLAGPQLVQMFIGDGAKLVRDAFELAKEKAPCIIFIDEIDAIGTKRFDSEVSGDREVQRTMLELLNQLDGFSSDERIKVIAATNRADILDPALLRSGRLDRKIEFPHPTEEARARILQIHSRKMNVHPDVNFEELARSTDDFNGAQLKAVCVEAG…
tr|A0A3B6HTC5|A0A3B6HTC5_WHEAT	TraesCS4A02G071300	VWFA domain-containing protein OS=Triticum aestivum OX=4565 PE=3 SV=1	1.75459	1.763014e-07	MVLESTMICIDNSEWMRNGDYSPSRFQAQADAVNLICGAKTQSNPENTVGVMTMAGKGVRVLVTPTSDLGKILACMHGLEVGAEANLAAAIQVAQLALKHRQNKRQQQRIIVFIGSPVTYDKKVLETIGKKLKKNNVALDVVDFGETDDEKPEKLEALIAAVNSSDSSHIVHVPPGDHALSDVLISTPIFTGEEGGSGFAASAAAAAATGATGYDFGVDPNVDPELALALRLSMEEERARQEAIAKKAAEDNKDQPSSSTDAIMAEAELTLNAPADVDADLLKDDDDAQLLQQALAMSMDEGASGAAAVADAAMAEAAADDQDLALALQMSVQDAEAAGQSDMSKVFEDRSFVTSILNSLPGVDPNDPSVKDLLASLHGQGEEEKKDKEDKPDISEDGKN
tr|A0A3B6KHF8|A0A3B6KHF8_WHEAT	TraesCS5A02G163600	Uncharacterized protein OS=Triticum aestivum OX=4565 PE=4 SV=1	1.55158	0.00392976	MVHLPHMGKLRRGLKEEAVDDDGDAAGAAGAEASPFHKRSRLAHQQQPPQQWSTGGASVSNQQSSQHDFLEEPSPLGLRLKKSPSLVDLIQMKLVQAGKAKDARHGGTASASEKLKASNFPGSILRIGSWEWVSRHEGDLVVKCYFAKHKLVWEVLDGGLKSKIEIQWSDICALKVVCPETEPGTLEIALSRQPLFFRETNPQPRKHTLWQATSDFTAGQASMHRRHFLQCAPGMMNKHVEKLVHCDPRLCSLSQQNEITLENPYFESRSSIFEDPDDVKCQNFVHNKDDDDQLTPQRFRELLQHHSASGRIDAEERQEAGTSDGLPQGFSNSVADSQVIKQDDGSSVGEPHTNILSWNGFKLPGIRRSMSKSEIANHIGHHIYRHMYSGNLPAADGGA…
tr|A0A3B6PI37|A0A3B6PI37_WHEAT	TraesCS6B02G135400	Uncharacterized protein OS=Triticum aestivum OX=4565 PE=4 SV=1	1.54222	0.000105615	MYLYSLTLQRATGAVCAVIGSFSGRDSKKSNAAGSSTQEIAVARGGTLDLLRPDPETGRLRTLLSVDVFGAIRSLAQFRLTGATKDYLVVGSDSGRLVILEYSPDRNRFDKVHQETFGKSGCRRIVPGQLLSVDPKGRALCIAALEKQKLVYVLNRDASARLTISSPLEAHKSHTLTFALTALDCGFDNPVFGAIELEYGDSDRDPTGQAASHAQKLLTFYELDLGLNHVSRKVSEPIDNGANMLVTVPGGADGPSGLLVCCDNFVLYRNQGHPEVRAVIPRRVDLPAERGVLIVAAATHRQKSLFFFLLQTEYGDIFKVDLDHHGDTVSELRIKYFDTIPVASAICVLRSGFLFAASEFGNHALYQFRDIGRDVDVESSSATLMETEEGFQPVFFQPR…
tr|A0A3B6I0E9|A0A3B6I0E9_WHEAT	TraesCS4A02G329600	PCI domain-containing protein OS=Triticum aestivum OX=4565 PE=3 SV=1	1.84666	1.037735e-08	MGGSSSLDAAIESLLNTEKQCRLAGDVAGTRKAAVDIVELCFKDAAWKTLNDQIVVLSKRRGQLKQAITAVVQKAMEYIDVTPDVETRIELIKTLSSVAAGKIYVEIERARLIKRLAKIKEEQGKIDEAAEIMQEVAVETFGSMAKTEKLAFILEQVRLCLDRQDYVRAQILSRKISPRVFDADTSKDKKKPKEGDNMVQEAPADVPSLLELKRIYYELMIRYYSHNNDYLEICRCYKSIYEIPSIKEDPAKWTPILRKICWFLVLAPHDPMQSSLLNATLEDKNLSEIPNFRLLLKQVVTMEVIQWTKLWEFFKDEYENEKNLLGGALGTKAAEDLKLRIIEHNILVVSKYYSRITLKRLADLLCLSLQEAEKHISDMVNSKALIAKIDRPMGIVSFR…
tr|A0A3B6I4R9|A0A3B6I4R9_WHEAT	TraesCS4A02G423600	H15 domain-containing protein OS=Triticum aestivum OX=4565 PE=3 SV=1	1.55702	7.522932e-05	MATVMEEAAAKAVVGAGEKAEAVATPEKVDEVKQAGAGGEEMEVAGGEAKKAEEGGEVKKAEGEEKKPRSRKPRSAGPHHPPYFEMIKEAIMAAGDGQAGASAYAIAKRVGERHGEALPGNYRKVLAAQLRSFAAKGRLVRVKASFRLAPAEEKKALPAKKRTTKKAASKKARPKRAKKAGPPPAKPKPKQPKSIRARKANKASA
tr|U5HTD8|U5HTD8_WHEAT	TraesCS2A02G485400	Ribosomal protein S20 OS=Triticum aestivum OX=4565 GN=rps20 PE=2 SV=1	1.5537	4.788356e-05	MATELAYAPPMKSGKLGFEGTQEVQHRIRITLSSKSVKNLEKVCSDLVKGAKEKQLKVKGPVRMPTKVLNITTRKSPCGEGTNTWDRFEMRVHKRVIDLVSSPDVVKQITSITIEPGVEVEVTISDQ
tr|A0A3B6PSA8|A0A3B6PSA8_WHEAT	TraesCS6B02G389200	CYTOSOL_AP domain-containing protein OS=Triticum aestivum OX=4565 PE=3 SV=1	2.40325	1.916278e-08	MGHTSAAASAVPALGLTKANAVELPQVAFTGKDIEFSDWKGDILAVAVTEKDLSKGSDSKFENAVLKKLDAQLGGLLLEASAEEDFTGKAGQSVVLRLSGQGFKRVALVGLGQSAPSTAAACRGIGESVASVAKSAQASSVAVVLASPAGIQEGFKLNAAASIASGTVLGLHDDSRFKAESKKVHLKQVDLIGLGSGSELDQKLKYVNDLSSGVIFGKELVNAPANVLTPAVLAEEASKIASEYSDVFTATILDVEKCQELKMGSYLGVAAASANPPHFIHLCYKPVGGNVKRKLAIVGKGLTFDSGGYNIKTGPGCSIELMKFDMGGSAAVFGAAKALAQIKPPGVEVHFIVAACENMISGTGMRPGDILTASNGKTIEVNNTDAEGRLTLADALVYA…
tr|A0A3B6C6R8|A0A3B6C6R8_WHEAT	TraesCS2D02G285200	Uncharacterized protein OS=Triticum aestivum OX=4565 PE=4 SV=1	1.77823	3.018885e-06	MATADGQSQPAATEPSPSPAKRKTDTDSEVSPLDPPAKAARPGADEEAAAEAKARVADKGKGKMVVDEEEEGDEESDEEEDDEEVEGDGDESDGLCEDPLSEVDLNNILPSRTRRCAPAQPGAYLVPPEEAAEDDEDDEDADVDMAPGEESGDGEESD
tr|A0A3B6B702|A0A3B6B702_WHEAT	TraesCS2A02G504000	UDPGT domain-containing protein OS=Triticum aestivum OX=4565 PE=3 SV=1	5.86163	2.931715e-08	MPQIVQDRASRTCAVRMGQYGRKPEARGLLINTYERLEARAVTALREGACVPGRPTPPVYCIGPLIVKGEAAAQAQGACLSWLDEQPERSVVFLCFGSLGAMSAAQLKEIARGLENSGHRFLWVVRSPPEDPAKYFLPRPEPDLDALLPDGYLKRTQGRGLVVKMWAPQVEVLGHAATGAFVTHCGWNSVLEAASAGVPMLCWPQYAEQRANKVFVVDEMKLGVVMEGYDEELVKAEEVEKKVRLVMESDEGGKLRGRLALAKEKAAEALADGGPSRTAFAEFLKDL
tr|A0A3B6QD96|A0A3B6QD96_WHEAT	TraesCS6D02G161800	Uncharacterized protein OS=Triticum aestivum OX=4565 PE=4 SV=1	1.65249	2.65762e-06	MASPPEGVEPAVIHAWSAPRSLSTSLMYSFSERDDMDVLDEPLYANFLRVTGVDRPYRQELLSKMDPDGNKVVKEVIFGPGEKAYRYCKHIAKQRLPNLTGDLMKKGKHFILIRNPMNILPSFDKVVPPSFLELGVAELVAIYSELCELGSPPPVIDADDLQRDPEAVLSGLCEDLGIPFQPQMLKWKAGPRDFDGIWAPWWYESVHTSTGFSKSRRYPMTFPFAFYDLLEQSLPFYNMLKRQVRRTTGSLLPPPPDPPLPVPENKKILVWVGDELLPRDSARVSVFDSVVQGGDAVWEGLRIYDGKVFKLEEHLDRLFDSTKAMAFSNVPSRDWIKDAIFKTLNANGMFNNAHIRLTLTRGKKVTSGMSPAFNLYGCVLIVLAEWKPPVYDNSHGIKL…
tr|A0A3B6GMX4|A0A3B6GMX4_WHEAT	TraesCS3D02G124600	Ubiquitin carboxyl-terminal hydrolase OS=Triticum aestivum OX=4565 PE=3 SV=1	1.64248	9.54253e-06	MDLLRANLHKVRIPEPTNRIHKDECCVSFDTPRSEGGLYVDMNSFLGFGREHVAWNFEKSENPVYLHIVQRRKPEPDETDRPLKKPTLLAIGVEGGFGEQEPEYDVTYEIVILPEFVSLPFPSVDLPEKVRLAVDKVILAESADRKQQLASWVADKKIISAHAMDLQQLDNGVIVPPTGWKCSKCDKTENLWLNLTDGMILCGRWVWDGTGGNNHAVEHYQQTKYPLAVKLGTITADLEGADVYSYPEDDSVEDPILAQHLSHFGIDFSSLQKTEMTTAERELDHNTNFDWNRIQESGKDAEPLYGPGYTGLVNLGNSCYMASVMQVMFSTHPFISRYFEKQSLKAVFAISQADPTLDLNMQMTKLAHGMLSGKYSAPSQEQRAGYSLVKWVELPRDKY…
tr|A0A3B6FLV0|A0A3B6FLV0_WHEAT	TraesCS3B02G219800	PCI domain-containing protein OS=Triticum aestivum OX=4565 PE=4 SV=1	2.04398	2.068099e-09	MGSDADMEDYGFEYSDDEPEEQDVDIENQYYNSKGMVETDPEGALAGFDAVVRMEPEKAEWGFKALKQTVKLYYKLGKYKEMMDAYREMLTYVKSAVTRNYSEKCINNIMDFVSGSASQHFNLLQEFYQTTLKALEEAKNERLWFKTNLKLCKIWFDMGEYGRMSKILKELHKSCQKEDGSDDQKKGTQLLEVYAIEIQMYTETKNNKKLKELYQRALSIKSAIPHPRIMGIIRECGGKMHMAERQWADAATDFFEAFKNYDEAGNPRRIQCLKYLVLANMLMESEVNPFDGQEAKPYKNDPEILAMTNLIAAYQKNDIMEFEKILKSNRRTIMDDPFIRNYIEDLLKNIRTQVLLKLIKPYTRIRIPFISQELNVPEKDVEQLLVSLILDNRVQGHID…
tr|A0A3B6C5U5|A0A3B6C5U5_WHEAT	TraesCS2B02G285600	PCI domain-containing protein OS=Triticum aestivum OX=4565 PE=3 SV=1	1.73605	2.031874e-06	MSAMQSSYLPATTESIAMAQEAKDASESILILYRVLEDPSSSSDAVRTKEVAITNLTNYLTKENRAQELRNLLTQLRPFFALIPKAKTAKIVRGIIDAVSKIPGTSDLQISLCKEMVEWTRAEKRTFLRQRVEARLAALLLESQEYTEALTLLSGLIKEVRRLDDKLLLVDIDLLESKLHFSLRNLPKAKASLTAARTAANAIYVPPAQQGTIDLQSGILHAEEKDYKTAYSYFFEAFEGFNALDDPKAIFCLKYMLLCKIMVNQADDVAGVISSKAGLKYVGPDVDAMKAVADAYSKRSLKYFETALGDYKAQLEEDPIVHRHLSSLYDTLLEQNLCRLIEAYSRVEIAHVAEMIELPIEHVEKKLSQMILDKKFAGTLDQGAGCLIIFEDAKTEAIF…
tr|H6BHN3|H6BHN3_WHEAT	TraesCS3D02G440400	Putative non-tir-NBS-LRR resistance gene analog (Fragment) OS=Triticum aestivum OX=4565 PE=4 SV=1	2.17094	2.646301e-08	GMGGLGKTTLVTNVYEREKVNFQTSAWMVVSQTYTLDALLRKLLEKVTEQPSSPNIDRMDVHDLKKEIKRKLKDRKCLIVLDDVWNKEVYSQMRDAFQNSDASRIIITTRNNHVASVAHLTRRIDLKPLGNAHAFELFCRRVFYIKEDHEYECPSHLMKTARSIVDGCQGLPLALKV
tr|W5HFJ0|W5HFJ0_WHEAT	TraesCS7D02G243500	Uncharacterized protein OS=Triticum aestivum OX=4565 PE=3 SV=1	1.55808	5.094716e-06	MADKKGGAPRKEEVVTREYTVNLHKRLHGCTFKKKAPNAIKELRKFAQKAMGTTDVRIDVKLNKLIWSSGIRSVPRRVRVRIARRRNDEEDAKEELYSLVTVAEVPAEGLKGLGTKVVDDTE
tr|A0A3B6GPH9|A0A3B6GPH9_WHEAT	TraesCS3D02G025700	BOWMAN_BIRK domain-containing protein OS=Triticum aestivum OX=4565 PE=3 SV=1	2.09404	7.593218e-08	MGMKRCVVVASILLMLALLVAGDEVGAILLPSEAKAEGLQLQTKQPWPWRRPRGRGSAATGPCAPGRSRRSAPACMDEFFECPSTCKACRPSIHGPSRHVCQDQYVGDPGPICRPWECCDLPSCTRSYPPTCRCMDEVDKCAPTCKSCLPSRSRPSRRVCIDSYFGPFPPACTPKVVAAGGN
tr|A0A3B6FHK1|A0A3B6FHK1_WHEAT	TraesCS3B02G025200	Fructose-bisphosphate aldolase OS=Triticum aestivum OX=4565 PE=3 SV=1	1.5256	2.076919e-06	MVTAKLSSPAAARLAPSAGSARRASRVRVRASGGSYADELVSTAKTVASPGRGILAIDESSATCGKRLASIGLDNTEVNRQAYRQLLLTTAGLGEYISGAILFEETLYQSTTDGKTFVDVLKDQNIMPGIKVDKGLVPLPGSNNESWCQGLDGLASRCAEYYKQGARFAKWRTVVSIPCGPTALAVKEAAWGLARYAAIAQDNGLVPIVEPEILLDGDHGIERTLEVAEKVWSEVFFYLAENNVLFEGILLKPSMVTPGAEHKEKASPEAIAKNTLTMLRRRVPPAVPGIMFLSGGQSELEATMNLNAMNQSANPWHVSFSYARALQNSVLKTWQGQPENIEAAQKALLVRAKANSLAQLGSYTGEGESDEAKKGMFQKGYTY
tr|A0A3B6SH12|A0A3B6SH12_WHEAT	TraesCS7B02G128800	AB hydrolase-1 domain-containing protein OS=Triticum aestivum OX=4565 PE=4 SV=1	3.13317	2.745532e-08	MASDGVITHRSVEVNGVRLHVAEAGPAGAPVVLLLHGFPELWYTWRHQMPALAAAGYRAVAPDMPGYGDSEAPSAGPDQYTALHIVGDLVALIDSLGQERVFVVGHDWGAIIAWSLCLFRPDRVKALVALSVPFIPRSPAVKPVDAVRALYGDDFYICSFQEPGAIEAEFKRLGTELVLRKFFADRTPGPLFIQKSGWGSPDDEVPLPSWITEEDLKYYTTQFDKSGFTGGFNYYRALNKTWELTSPWTGAEIMVPTKFTVGNLDLTYNIAGAKVFINKGGLKKFVPLLDDVVIMKDVGHFINEEKPEEISALIIGFIKKFN
tr|A0A3B6ASP4|A0A3B6ASP4_WHEAT	TraesCS2A02G090000	AAA domain-containing protein OS=Triticum aestivum OX=4565 PE=3 SV=1	1.93001	3.606129e-07	MGQGTPGGMGKQGGAPGDRGKPGGDGDKKDKKFEPPAAPSRVGRKQRRQKGPEAAARLPGVAPLSKCRLRLLKLDRVKDYLLMEEEFVAAQERLRPTEEKTEEDRSKVDDLRGTPMSVGSLEEIIDESHAIVSSSVGPEYYVSILSFVDKDQLEPGCSILMHNKVLSVVGILQDEVDPMVSVMKVEKAPLESYADIGGLDAQIQEIKEAVELPLTHPELYEDIGIRPPKGVILYGEPGTGKTLLAKAVANSTSATFLRVVGSELIQKYLGDGPKLVRELFRVADELSPSIVFIDEIDAVGTKRYDAHSGGEREIQRTMLELLNQLDGFDSRGDVKVILATNRIESLDPALLRPGRIDRKIEFPLPDIKTRRRIFQIHTAKMTLSDDVNLEEFVMTKDEF…
tr|A0A3B6C6H4|A0A3B6C6H4_WHEAT	TraesCS2B02G295300	PKS_ER domain-containing protein OS=Triticum aestivum OX=4565 PE=4 SV=1	1.5619	3.494049e-05	MATPTTTPATMRAVQYDACGGGAAGLKHVEVPVPSAKKNEVLLKLQAATINPVDWKIQKGDLRPLLPRRLPFIPVTDVAGVVVDVGPGVKGVTVGDQVVAMLNSFNGGGLAEYAVASANLTVKRPAEVSAAEGAGLPIAAGTALQALRSIGAKFDGTGKPLNVLVTAASGGVGLYAVQLAKLANLHVTATCGARNMDLVKSLGADEVMDYRTPEGASLQSPSGRKYDGVVHCTVGVSWSFFQPLLSDAGRVIDITPNLSAILTSALHRVTFSKKRLVPLLLSPNKADLEFLVGLLKEGKLKTVIDSKFPLSDAGKAWQSSIDGHATGKIVVEMES
tr|A0A077RTW4|A0A077RTW4_WHEAT	TraesCS3B02G294200	Serine/threonine-protein phosphatase OS=Triticum aestivum OX=4565 GN=TRAES_3BF011700090CFD_c1 PE=3 SV=1	1.55936	9.118546e-06	MDLDLWISKVKEGQHLAEHELQTLCEYVKEILIEESNVQPVNSPVTVCGDIHGQFHDLMKLFATGGHVPETNYIFMGDFVDRGFNSLEVFTILLLLKARYPAHITLLRGNHESRQLTQVYGFYDECQRKYGNANAWRYCTDVFDYLTLSAIINGTVLCVHGGLSPDVRTVDQIRTIDRNCEIPHEGPFCDLMWSDPEEIETWAVSPRGAGWLFGSRVTTEFNHVNNLDLVCRAHQLVQEGLKYMFQDKGLVTVWSAPNYCYRCGNVASILSFDENMDRDVKFFTETEENNQMRGPRTAVPYFL
tr|A0A3B6BZH1|A0A3B6BZH1_WHEAT	TraesCS2A02G086400	AAA domain-containing protein OS=Triticum aestivum OX=4565 PE=3 SV=1	2.55038	3.40899e-08	MSAAAVAPSPAAPLPSAPPPSYPAAPPAPSAEDDDDLYGRLKSLQRHMEFVEIQEEYVKDEQKNLKRELLRAQEEVKRIQSVPLVIGQFMEMVDGNNGIVGSTTGSNYYVRILSTINRELLKPSASVALHRHSNALVDVLPPEADSSISLLASSEKPNVLYSDIGGCDIQKQEIREAVELPLTHHELYKQIGIDPPRGVLLYGPPGTGKTMLAKAVAHHTTAAFIRVVGSEFVQKYLGEGPRMVRDVFRLAKENAPAIIFIDEVDAIATARFDAQTGADREVQRILMELLNQMDGFDQTVNVKVIMATNRADTLDPALLRPGRLDRKIEFPLPDRRQKRLVFQVCTAKMNLSDEVDLEDYVSRPDKISAADITAICQEAGMHAVRKNRYVILPKDFEKG…
tr|A0A3B6A134|A0A3B6A134_WHEAT	TraesCS1D02G395700	Uncharacterized protein OS=Triticum aestivum OX=4565 PE=4 SV=1	1.85902	2.425726e-07	MDPAAEMDTGELDALLRAAADFASYPGTHGEDTVRQFLEQFPLPKLLGVLQSQADLPETVETVAACLDKVFSSRYGASLLPSYGEFIQAGLLTNSNSIKQLACKAVVHLLDKAGDIAVAVDTFVQHNLYPLLINCLVEGDEEISAIVLDAIKRLAEIPTGTDIIFPPDGQGLQLNKVAAQSSSMARIRILSLIAKLFGASSCTATAIRDSNLLSLFEDEIKDRKDMLKTLSALEVLYELAEHPHSNMFLLKTSLLQHITDVINDPSADSIVRSRASLISGRLLSSADAFMTIEKSCVTNLLLAIDKILRTEESQNTDEIESALETLGLIGTTTQGACLLLSDPPNIARHVVEMSFDRQGRGKHLAALHALGSICGVDRQEDQMKLDDPQAEEFLKRLVY…
tr|W5ASA4|W5ASA4_WHEAT	TraesCS2A02G245900	Genome assembly, chromosome: II OS=Triticum aestivum OX=4565 GN=CAMPLR22A2D_LOCUS2419 PE=3 SV=1	1.97432	2.35933e-06	MADVDVDTEVAAGAQPKKRTFRKFSYRGVDLDALLDMSTDDLVQMFPARARRRFKRGLKRKPMALVKKLRKAKKDAPAGEKPEPVRTHLRNMIIVPEMIGSLIGVYNGKTFNQVEIKPEMIGHYLAEFSISYKPVKHGRPGIGATHSSRFIPLK
tr|A0A3B5Z1W3|A0A3B5Z1W3_WHEAT	TraesCS1B02G314100	Na_H_Exchanger domain-containing protein OS=Triticum aestivum OX=4565 PE=4 SV=1	5.53448	5.237851e-05	MTDTLPGGGDVTAPMEQAAAAVGVTGSGAAAAAVVCYSPMKVTTYGIWEGVNPLEFSLPIFILQTAVIVGTTRLLVLLLKPFRQPRVIAEILAGVILGPSVMGQVGTWAGTVFPGRSLLTLETVAHLGLLYFLFLVGLEMDVNVIKRSGKKAVIIAVAGMALPFCIGTATSFIFRHQVSKNVHQASFLLFLGVALSVTAFPVLARILAEIKLLNSELGKIAMSAAIVNDMCAWILLALAIAISDVNSTPFSSLYVLLSGVAFVLACFYVVRPVMWWIVRRIPEGETISDVQVTLILTGVMISGVCTDAIGIHSVFGAFVYGLVIPSGELGVVLIEKLEDFVMGLLLPLFFAISGLRTNVTRVSDPVTAGLLVLVFVMASFAKIMGTILIAISYTMTFRD…
tr|A0A3B6NM50|A0A3B6NM50_WHEAT	TraesCS6A02G122000	Protein kinase domain-containing protein OS=Triticum aestivum OX=4565 PE=4 SV=1	2.95137	7.897207e-06	MNLCVTALLFYMFQLIHGQPDYLGFISIDCGIEVNSTYQDSVSNMIYVSDYSFVTTGENHGISSDYVKPSLVKRYLNLRFFPHGARNCYTLRSLVMGNKYLVRAAFYYGNYDGLGKPPVFDLYLGTNYWHEVSLSDAGAFNWMDIIVVAPDDYLQVCLVNKGMGNPFISGLDLRPMKNTLYPEVNATQSLVLVNSNRFHMGPTDGSVIRYPSDSHDRIWTTYNAIPNCIQISATSVIQNNLRDVYDVPSSVMQNAVTANSSRIDFSWNPSDPSVNISSKYFFIFYFAELQTVGSNAVRQFDIIINSKTWNKQPYTPTFQVTDYFSGILHGMENYSVSLVATKNATLPPILNAMEMYLVKPITAVATDPGDARAMMAIQDDFGVIKNWMGDPCIPKASIW…
tr|A0A3B6N3B9|A0A3B6N3B9_WHEAT	TraesCS5D02G568300	Importin N-terminal domain-containing protein OS=Triticum aestivum OX=4565 PE=3 SV=1	1.75014	9.060007e-05	MWLQVVHILQNSQNLNTKFFALQVLESVIKYRWNALPVEQRDGIKNYISDVIVQLSSNEVSFRQERLYVNKLNIILVQVLKHEWPARWTSFIPDLVAAAKSSETICENCMAILKLLSEEIFDFSRGEMTQQKIKELKSSLNSEFRLIHELCLYVLSATQSSELIRATLATLHAFLSWIPVGFIFESPLLETLLKFFPMAAYRNLTLQCLTEVAALQFGDFYNVQYVKMYTFFMLQLQAILPPGTIPNAYANGSNEEQAFIQNLALFFTAFFKNHIRILEASAENRAALLVGLEYLIGISYVDDTEVFKAQMIPGVDGTGTAVHQRRQLYASPLSKLRMLMICRMAKPEEVLIVEDENGNIVRETMKDNDVLVQYKIMRETLIYLSHLDHEDTEQQMLKK…
tr|A0A3B6NMR2|A0A3B6NMR2_WHEAT	TraesCS6A02G116500	26S proteasome non-ATPase regulatory subunit 2 homolog OS=Triticum aestivum OX=4565 PE=3 SV=1	2.18321	4.263206e-09	MSPPENPNGGAAAAAPSEPAPPAKPSSSKGKKKDDKKDDDLSEEDLALKEQLELYVVRAQDVDPGVQRLALESMRQEIRSATSSMTSVPKPLKFLRPHYGTLKSYYETMPESELKKYMADILSVLALTMSAEGERESLRYRLLGSEGDIGSWGHEYVRNLAGEIAQEFQKRQGDDMPIDELMELVQQIVSFHMKVEDLDLLVEHVDSTNYKRTCLYLTSSSRFLPSPDDTLALDIAYTIYMKFEDLASALRIALLLDNKYVKQVYTATDDLVLKKQFSYIIARHGLAMEIDDEIAADENDKEMLQEIVNNTKLSEGYLTLARDIEVMEAKSPEDIYKVHLIDGRGASSSLDSARQNLAATFVNAFVNAGFGQDKLMTAPSDSSSSGSSGNWLFKNKEHG…
tr|A0A3B5Y5L2|A0A3B5Y5L2_WHEAT	TraesCS1A02G364100	Uncharacterized protein OS=Triticum aestivum OX=4565 PE=3 SV=1	8.45129	2.450037e-08	MASNQNQASYAAGETKARTEEKTGQMVGTTKDKAGQATETTKQKAGEAKDKTAQTAQAAKDRAAESKDQTGSYLGEKTEAAKQKASETAQYAQERSSDAAQYTEESAVAGKDKTGNVLQQAGETVANAVANTLGMGSPLAPQRTAPPRRSPGITRRMHTSNLC
tr|A0A3B6FG18|A0A3B6FG18_WHEAT	TraesCS3B02G038800	Aldo_ket_red domain-containing protein OS=Triticum aestivum OX=4565 PE=4 SV=1	1.60925	0.00765259	MPAREQGTAAKVLKLSNGHEMPAVGLGVWRMDAPAIRGLIHSAIRAGYRHFDCAAKYQNEAEVGDALAEAFEIGLIKREDLFITTKLWNSDHGHVVEACKDSLKKLQLDYLDLYLIHFPVATKHTGIGKTASALGDDGVLDINTTISLETTWHGMEDLVSMGLVRSIGISNYNILLTRDCLAYAKIKPAVNQIETHPYFQRDSLVKFCQKHGICVTAHTPLGGSTANTELFGSVSCLDDPVIKSLAEKYGKTPAQLVLRWGLQRNTVVIPKTSKVERLQENLAVVDFDISSEDMEKIKALDRNYRTNQPAKFWGIDIYA
tr|A0A3B6RDA2|A0A3B6RDA2_WHEAT	TraesCS7A02G107100	Ubiquitin-like modifier-activating enzyme 5 OS=Triticum aestivum OX=4565 PE=3 SV=1	2.20672	5.293793e-08	MEEELHALLRDLDALKQLPDPASIDRMRDRVVKMMGPSGAAAATRSKIKDMSAEVVDSNPYSRLMALQRMGIVDNYERIRDYSVAIVGVGGVGSVAAEMLTRCGIGRLLLYDYDTVELANMNRLFFRPDQVGMTKTDAAVQTLSEINPDVVLESYSLNITTVKGFETFLGSLKARSSNGRSTGVDLVLSCVDNYEARMVVNQACNELRQTWMESGVSEDAVSGHIQLLVPGETACFACAPPLVVASGVDERTLKRDGVCAASLPTTMGVVAGLLVQNSLKYLLKFGQVSPYLGYNSLKDFFPTMEMRPNPQCSNPACLERQKEYMQSKPARDAAAKAKMEAEASAAIEYPVHVDNEWNISVLDDSDTATSSVQRAAADILPEGLVRELPDEDSYVEPPA…
sp|P04464|CALM_WHEAT	TraesCS1D02G308100	Calmodulin OS=Triticum aestivum OX=4565 PE=1 SV=3	1.73139	1.910456e-09	MADQLTDEQIAEFKEAFSLFDKDGDGCITTKELGTVMRSLGQNPTEAELQDMINEVDADGNGTIDFPEFLNLMARKMKDTDSEEELKEAFRVFDKDQDGFISAAELRHVMTNLGEKLTDEEVDEMIREADVDGDGQINYEEFVKVMMAK
tr|A0A0C4BK41|A0A0C4BK41_WHEAT	TraesCS6D02G326400	AAA domain-containing protein OS=Triticum aestivum OX=4565 PE=3 SV=1	3.24089	1.658034e-09	MAPEPEDDIMAEKNPRPLDEDDIALLKTYGLGPYSTSIKTAEKEIKELAKRINDLCGIKESDTGLAPPSQWDLVSDKQMMQEEQPLQVARCTKIINPNTDDAKYMINVKQIAKFVVGLGDKVSPTDIEEGMRVGVDRNKYQIQIPLPPKIDPSVTMMTVEEKPDVTYNDVGGCKEQIEKMREVVELPMLHPEKFVKLGIDPPKGVLCYGPPGTGKTLLARAVANRTDACFIRVIGSELVQKYVGEGARMVRELFQMARSKKACIIFFDEVDAIGGARFDDGAGGDNEVQRTMLEIVNQLDGFDARGNIKVLMATNRPDTLDPALLRPGRLDRKVEFGLPDLEGRTQIFKIHTRTMNCERDIRFELLARLCPNATGADIRSVCTEAGMYAIRARRKTVTE…
tr|A0A3B6TTS2|A0A3B6TTS2_WHEAT	TraesCS7D02G333000	Uncharacterized protein OS=Triticum aestivum OX=4565 PE=4 SV=1	1.53161	6.779861e-08	MADSADPTPSPPPPEASPAAAKPVSVDPAPESASPAAKPVSADPVPPQAPEAATPAPAAKTVSADPVPHQAPEAATPAAAAAAAGPDLDGPPRRSATAGKLKKPFTDKLRAAAEERLARIPVDLRLRPLDPPPPSISNHEAALRALGLLDFARFDPGSEPPRPDLVAQLIAYYDRINQRSFVWDTRVSLNRTELANAFSLPKKTVGPPAPPRGFKTAALVSAALEFMRVCIHPWFTDCTLPQEVAGGEQTVKDGSPHKVNWAGIIWGIIEKEIHELPGRDDGVCQYGAYLQQLIRVQKPLLFELPQKEEAGKLVRKVPSDLVKDERDGDADARNKGLQELEPRDADADASSKGPKESELEGVSLTSKSLDESGPADADASGNDLKELESGDVRSNILEE…
tr|A0A3B6AVX7|A0A3B6AVX7_WHEAT	TraesCS2A02G174600	Uncharacterized protein OS=Triticum aestivum OX=4565 PE=4 SV=1	1.9597	2.834975e-05	MGRWLKPDVYPLIGAMSLVTGMCIFQLTRNVFLNPDVRVSKSNRQSAVPENEEEGERYSQHAFRRFVSAHRPEVFPAINRFFSGFSAK
tr|A0A3B6ASP6|A0A3B6ASP6_WHEAT	TraesCS2A02G079500	Oxoglutarate dehydrogenase (succinyl-transferring) OS=Triticum aestivum OX=4565 PE=3 SV=1	1.79564	2.800326e-09	MTWLRAATGLARHAARRAALARATIPTPGARSAGFHTSALRRRAAAPAPRAVPLSRLTDSFLDGTSSVYLEELQRAWEADPASVDESWDNFFRNFLGQAASPTAGLSGQTIQESMQLLLLVRAYQVNGHMKAALDPLGLDDRAVPEDLDLALYGFTEADLDREFFLGVWMMAGFLSENRPVLTLREILSKLERAYCGPIGFEYMHIPDRDKCNWLREKIETVAPREYPKDRRLVMLDRLIWSTQFENFLATKWATAKRFGLEGGETLIPGMKEMFDRSADLGVENIVIGMPHRGRLNVLGNVVRKPLSQIFSEFAGGTRPVEGEDGLYTGTGDVKYHLGTSYDRPTRGGKRIHLSLVANPSHLEAVDPVVIGKTRAKQFYSNDDDRTKNMGILIHGDGS…
tr|A0A3B6NIG8|A0A3B6NIG8_WHEAT	TraesCS6A02G006400	Uncharacterized protein OS=Triticum aestivum OX=4565 PE=3 SV=1	2.04488	6.943298e-07	MASPFGAASSCGLKAAAPSGFATRKQLSLVSPPLVSLPQRARPGRKCSFRVNAAKELYFNKDGSAIKKLQTGVNKLADLVGVTLGPKGRNVVLESKYGSPRIVNDGVTVAKEVELEDPVENIGAKLVRQAAAKTNDLAGDGTTTSVILAQGMIAEGVKIVAAGANPVQIARGIEKTTKALVSELRKMSKEVEDSELADVAAVSAGNNYEIGNMIADAMSKVGRQGVVTLEEGKSAENNLYVVEGMQFDRGYISPYFVTDSEKMSVEYENCKLLLVDKKINNARDLITLLEDAIKGGYPILIIAEDIEQEALATLVVNRLRGALKIAAIKAPGFGERKSQYLDDIATLTGGTVIREEIGLSLDKADKEVLGNAAKVVITKDSTTIVGDGTTQEEVTKRVT…
tr|A0A3B6LYL8|A0A3B6LYL8_WHEAT	TraesCS5B02G554700	Uncharacterized protein OS=Triticum aestivum OX=4565 PE=3 SV=1	1.90529	9.445644e-06	MTAAVLARPTPGNVQCFGRKKTAVAVAHCKPGRGLIKALEPILLAGKSRFKGIDMRICVSGGGKVSQVYSIRQAIARALVAYNQKYVDEAAKKEVKEILGRYDRTLLVADPRCCEPKKFGGRGARARFQKSYR
tr|W0C8U3|W0C8U3_WHEAT	TraesCS1B02G329992	High-molecular-weight glutenin subunit 1By15 OS=Triticum aestivum OX=4565 GN=Glu-B1 PE=3 SV=1	1.60279	6.980497e-05	MAKRLVLFATVVITLVALTAAEGEASRQLQCERELQESSLEACRQVVDQQLAGRLPWSTGLQMRCCQQLRDVSAKCRPVAVSQVVRQYEQTVVPPKGGSFYPGETTPLQQLQQVIFWGTSSQTVQGYYPSVSSPQQGPYYPGQASPQQPGQGQQPGKWQELGQGQQGYYPTSLHQSGQGQQGYYPSSLQQPGQGQQTGQGQQGYYPTSLQQPGQGQQIGQGQQGYYPTSPQHPGQRQQPGQGQQIGQGQQPGQGRQIGQGQQSGQGQQGYYPTSPQQLGQGQQPGQWQQSGQGQQRYYPTSQQQPGQGQQGQYPASQQQPGQGQQGQYPASQQQPGQGQQGQYPASQQQPGQGQQGQYPASQQQPAQGQEGQYPASQQQPGQGQQGHYPASEQQPGQGQ…
tr|A0A3B6RBX7|A0A3B6RBX7_WHEAT	TraesCS7A02G176600	Uncharacterized protein OS=Triticum aestivum OX=4565 PE=3 SV=1	1.58071	0.000416793	MGRFGWLRLASRSLARRSGEASAQRSAWIRPSTPCTSSGADRCYGRSTFISSVPSRFFHSTGQRYSMDKDYYKVLGVTKDASQDDIKKAFQSLAKKYHPDTNRGNTAAKRMFQEVRDAYETLRDPSKRQQYDMLFSGGSAANSTRGRGEFDGSYQDPFSRFNKQNDDPFAQFYRQNDGPFSNQFYKVFSEVFQHDVDVHASDIEIELNLSFGEAAKGCTKEVPFSAKNLCYSCDGRGYLANARKYVCPSCKGAGKVSMYPFTSICTTCRGFGKVIKDHCLTCKGAGVVDGMKYANVIIPAGVDSGDTIHVREAGNSGGRGAIPGSLYIKLRVASDPVFVRDGADVHVDKKISFTQAMLGGKIEVPTLDGKTEIKIPKGVQPGQVVVLRGKGLELPNQAG…
tr|A0A3B6JIU4|A0A3B6JIU4_WHEAT	TraesCSU02G068100	Splicing factor U2af large subunit OS=Triticum aestivum OX=4565 PE=3 SV=1	1.64039	1.048508e-05	MLPGSSIPGMFPNMLPFAVGQFNPLVMQPQAMTQQATRHARRVYVGGLPPSANEQSVAIYFNQVMAAIGGNTAGPGDAVLNVYINHDKKFAFVEMRSVEEASNAMALDGILFEGAPVKVRRPTDYNPSLAAALGPSQPSSNLNLAAVGLTPGSAGGLEGPDRIFVGGLPYYFTEAQVRELLESFGPLRGFDLVKDRETGNSKGYAFCVYQDLNVTDIACAALNGIKMGDKTLTVRRANQGSAQPRPEQENILLQAQQQVQLQKLVYQVGALPTKVVCLTQVVTADELKDDEEYEDIMEDMRLEAGKYGNLVKVVIPRPHPSGEPVSGVGKVFLEYADVDGSTKAKTAMHGRKFGGNPVVAVFYPENKFADEDYDAAA
tr|A0A3B6LWA6|A0A3B6LWA6_WHEAT	TraesCS5B02G485100	Uncharacterized protein OS=Triticum aestivum OX=4565 PE=3 SV=1	2.30503	0.0139924	MGEKALESLPQGQEEAPRKQEDAAAYGPPAFAELATGNKGRGDVRQNKIVITEMDEFVLGLQLNAETRKREAHDVFADEDGGIVSSSTLVKDDTNGSAGRKKIAGTGDQVKDGEEGAVKPDKVLHEAEIGKGLAGALKLLKDRGTLDEGGNKTSDKKKSKPVGIKDKPKEIHIERTDEFGRVMTMKEAFRELSHKLHGKGPGKTKQEKRQRKYQDELKTKRMKSSDTPLMSAKKMREAQARSKTPYLVLSGNAKSRHAG
tr|A0A0C4BKL3|A0A0C4BKL3_WHEAT	TraesCS7D02G375500	AAA domain-containing protein OS=Triticum aestivum OX=4565 PE=3 SV=1	1.92828	2.237913e-08	MAEADDAAAARRRTVITEYRNKLLNCRELETRVRTGRENLKKAKKDYDKTEDDLKSLQSVGQIIGEVLRPLDSERFIVKASSGPRYVVGCRSKVDKEKLTAATRVVLDMTTLTIMRTLPREVDPVVYNMLHEDPGNVSYSAVGGLSDQIRELRESIELPLMNPELFLRVGIKPPKGVLLYGPPGTGKTLLARAIASNIDANFLKIVSSAIIDKYIGESARLIREMFNYAREHQPCIIFMDEIDAIGGRRFSEGTSADREIQRTLMELLNQLDGFDELGKVKMIMATNRPDVLDPALLRPGRLDRKIEIPLPNEQSRTEVLKIHAAGIAKHGEIDYEAVVKLAEGFNGADLRNVCTEAGMAAIRAERDYVIHEDFMKAVRKLNDAKKLESSAHYSADFGKD
tr|A0A3B6PQV3|A0A3B6PQV3_WHEAT	TraesCS6B02G346800	RRM domain-containing protein OS=Triticum aestivum OX=4565 PE=4 SV=1	1.802	0.000511363	MEAADVDMTAAGDDAAKELDEMKRRLKEMEEEAAALRDMQAKVAKEMQGGDANASTAEAKEQVDYACTPEEVQQHFQACGTVNRVTILTDKFGQPKGFAYVEFLEQEAVQEALNLNESELHGRQIKVSPKRTNVPGMKQRPPRGFNPYHAYPYRSYGAPYFPPYGYGRVPRFRRPTRYRPYF
tr|A0A3B5YYW4|A0A3B5YYW4_WHEAT	TraesCS1B02G264900	Pyruvate, phosphate dikinase OS=Triticum aestivum OX=4565 PE=3 SV=1	1.55084	1.351311e-06	MAPAQCARVQRVFHFGKGKSEGNKAMKDLLGGKGANLAEMASIGLSVPPGFTVSTEACEQYQAAGKALPPGLWEETLEGLKWVEEYMGARLGDPARPLLLSVRSGAAVSMPGMMDTVLNLGLNDEVAAGLAAKSGDRFAYDSYRRFLDMFGNVVMDIPHALFEEKLEAMKAAKGVDNDTDLTANDLRELVGQYKNVYVEAKGEQFPSDPKRQLQLAVLAVFDSWDSPRANKYRSINQITGLRGTAVNVQCMVFGNMGNTSGTGVLFTRNPSTGEKKLYGEFLVNAQGEDVVAGIRTPEDLDAMRDHMPEAYTELVENCEILESHYKEMMDIEFTVQENRLWMLQCRSGKRTGTGAVKIAVDMVNEALVDRNTAIKMVEPGHLDQLLHPQFANPEAASYK…
tr|A0A3B6HT79|A0A3B6HT79_WHEAT	TraesCS4A02G182300	Clathrin heavy chain OS=Triticum aestivum OX=4565 PE=3 SV=1	1.56512	1.420692e-06	MAAANAPIAMREALTLTSLGIAPQFVTFTHVTMESDRYICVRETSPQNSVVIIDMAMPSQPLRRPITADSALMNPNTRILALKAQIAGTTQDHLQIFNIEAKTKVKSHQMPEQVVFWKWITPKLLGLVTQTSVYHWSIEGDSEPTKMFDRTANLANNQIINYRCDPAEKWLVLIGIAPGAPERPQLVKGNMQLFSVDQQRSQALEAHAASFATFKVPGNENPSTLICFASKATNAGQITSKLHVIELGAQPGKPGFSKKQADLFFPPDFQDDFPVAMQISQKYGLVYVITKLGLLFVYDLETAAAVYRNRISPDPIFLTAESSTTGGFYAINRRGQVLHATVNDATVVPFVSGQLNNLELAVNLAKRANLPGAENLVVQRFQELFSQTKYKEAAELAAE…
tr|A0A3B6CBD9|A0A3B6CBD9_WHEAT	TraesCS2B02G440200	Uncharacterized protein OS=Triticum aestivum OX=4565 PE=4 SV=1	1.57027	4.84212e-07	MKDMTEAENKQTLQHNSLQEAQRSLTEKDKELADATQSLSELGSELEISKQRIQEIEAELSSSADKLHKLEELKDERSLHAAQEAKRAAELDKMLEMAQLNMKEMENQISNLQEEIKGHQDKAVDHQQVEESLNTTMSQFKMVQEALELSKSQVDDLEQKLASQDADISKLTEELSLHCSSEESLKEKSLKLETELATVNEELQAKLLSLQEMEMKLEEHAKEKETSEATLEKQQAQILNLQSVLDELKDEHETLKGTLVDSESKLSERDSMLRQAEEEHAKAQLLLSEALSHKEVLEVNLKSINEQHGESKAVAEDANGKILELEAQIQALHAAEEALKSHLEEASMNVEVAEKKCSALEQRLSESESKLATSSEQVKLLEEQVQQEAASSAEKEKEL…
tr|A0A1D5UNY7|A0A1D5UNY7_WHEAT	TraesCS2D02G383500	Genome assembly, chromosome: II OS=Triticum aestivum OX=4565 GN=CAMPLR22A2D_LOCUS3843 PE=3 SV=1	1.64532	5.199579e-06	MRAWWVCGFLPFLAAAAAAADPAKGNWEPLIRLPTEKGDAPAPAASAAEDGVTKWAVFVAGSSGYGNYRHQADVCHAYQILRKGGLKEENIVVFMYDDIAKNDLNPRPGVIINHPKGEDVYAGVPKDYTGKQVTAKNFFAVLLGNKTAVTGGSGKVINSKPKDHIFIYYADHGGPGVLGMPNRPYIYAGDFIKVLREKHASKSYSKMIIYVEACESGSIFEGLLPEDLNIYVTTASNAVENSWGAYCPGMKSSPPAEYDTCLGDIYSVSWMEDSETHNLKKETLKQQYEVVKTRTSKSKEFDKGSHVMEYGDKTFKDEKLFLYQGFDPANSNVANRLLLPELEGAINQRDADILFMWKRYEKLNGGSEEKQRVLREIKETVVHRKHLDSSIDFIGKLVF…
tr|A0A3B6HYL5|A0A3B6HYL5_WHEAT	TraesCS4A02G324000	Uncharacterized protein OS=Triticum aestivum OX=4565 PE=3 SV=1	1.81146	4.621084e-08	MPAGRKRPAPSPFAGFSPFARSLLFSPASGFSRLPLTNAGPAAKPHQDTADMPPPPPKRAKQAEPTSDEEERPSSDADEELSGSDGDSDSSLECSSSDDDDASQEMETVQADFAFFDPKPTDFHGVRLLLKTYLDSKPWDLTGFVDLVLEQTTVGTVVKMAEDEDEDGEANGGDKSDTGDDDEDLFGLITVLNLGRYGENRCIKDLKEYLLAVCGDKDTKKKLKSLLEDKASTVGLLVCRRFVNFPYEMVPKMYDSLFDEVAWATEDEPTQELQDSFRFKQYLLLVRILERKTPPKQKAKNSKDEDEPVIYPKLEDEIFRELSSWSFTFPIRAEQSAQQELKNYKEMGLVMCVKAEAIPKFRKKLEALVSE
tr|A0A3B6SSA0|A0A3B6SSA0_WHEAT	TraesCS7B02G412400	Uncharacterized protein OS=Triticum aestivum OX=4565 PE=4 SV=1	1.76914	1.176075e-09	MEGDGRKEGETPAAAVRGVASFGASVQEWGQHMKASVVGVWRKATARSEQEAAEADLRAAKEQVEATDEAEAKKKRLAG
tr|A0A3B5ZRD1|A0A3B5ZRD1_WHEAT	TraesCS1D02G087700	Carboxypeptidase OS=Triticum aestivum OX=4565 PE=3 SV=1	2.45562	2.481401e-11	MYSGYITVNESAGRSLFYLLQEAPEEAQPAPLVLWLNGGPGCSSVAFGASEELGAFLVKPRGAGLVLNEYRWNKVANVLFLDSPAGVGFSYTNTSSDIYTSGDNRTAHDSYTFLAKLFERFPHYKYLDFYIAGESYAGHYVPELSQLVHWRNKGIENPVINFKGFMVGNGLIDDYHDYLGTFESWWNHGIISDNTYRRLKASCLNDSFIRPSPACDAAVDVATAEQDNIDMYSLYTPVCNITSSSSSRRRPRGRYPWMTGSYDPCTAGCSTAYYNRRDVQRALHANVTGAMDYTWATCSHTINTHWHDTPRSMLPIYKELIAAGLRIWVFSGDTDAVVPLAATRHSIGALGLPTTTSWYPWYDDQEVGGWSQVYKGLTLVSIRGAGHEVPLHRLRQALV…
tr|Q0GNG0|Q0GNG0_WHEAT	TraesCS1D02G000200	Low molecular weight glutenin (Fragment) OS=Triticum aestivum OX=4565 GN=lmw-gs PE=4 SV=1	1.62584	4.354054e-07	MKTFLVFALLTVAATSAIAQMETRCIPGLERPWQQQPLPPQQTFPQQPLFSQQQQQQLFPQQPSFSQQQPPFWQQQPPFSQQQPILPQQPPFSQQQQLVLPQQPPFSQQQQPVLPPQQSPFPQQQQQHQQLVQQQIPVVQPSILQQLNPCKVFLQQQCSPVAMPQRLARSQMLQQSSCHVMQQQCCQQLPQIPQQSRYEAIRAIIYSIILQEQQQVQGSIQSQQQQPQQLGQCVSQPQQQSQQQLGQQPQQQQLAQGTFLQPHQIAQLEVMTSIALRILPTMCSVNVPLYRTTTSVPFGV
tr|A0A3B6RNU1|A0A3B6RNU1_WHEAT	TraesCS7A02G538600	Uncharacterized protein OS=Triticum aestivum OX=4565 PE=4 SV=1	1.52257	0.000143809	MSSSSSTVVYEGWMVRHGRRKIGRSFIHMRYFVLETRLLSYFKRKPQHKMPKLPIKSLHIDGNCRVEDRGLKMHHGHMLYVLSVYNKREKHHRITMAAFNIQEALIWKEKIEMVIDQQQGVVSPDGNTAFSSSQQNAGVENGRKSSSSDRDSQYSHEEEEEEEDNHRSLMRRTTIGNGPPESLHDWTRGNDTGISDQGSPAQVFSRGHWRLVRCQNGLRIFEELQDVDYLARSCSRAMKAVGVVEASCEAIFQLVMSMDTTRFEWDCSFQYGSLVEEVDGHTAILYHRLQLDWFSAFTWPRDLCYVRYWRRNDDGSYVVLFQSREHPNCGPQPGFVRAHIESGGFNISPLKSRNGRVRTQVQHLMQIDLKGWGVGYLPSFQQHSLLHMLNSVAGLREWF…
tr|A0A077RQ51|A0A077RQ51_WHEAT	TraesCS1D02G232900	Histone H2B OS=Triticum aestivum OX=4565 GN=TRAES_3BF067800300CFD_c1 PE=3 SV=1	1.87482	0.0271686	MAPKAEKKPAAKKPAEEEPAAEKKPKAEKRDGDKKGKKKAKKSVETYKIYIFKVLKQVHPDIGISSKAMSIMNSFINDIFEKLAGEAAKLARYNKKPTITSREIQTSVRLVLPGELAKHAVSEGTKAVTKFTSS
tr|W5FIY8|W5FIY8_WHEAT	TraesCS5B02G478900	RRM domain-containing protein OS=Triticum aestivum OX=4565 PE=4 SV=1	1.52533	1.13703e-06	MAAASLRKGNARLPPEVNRALFVRNLPFNISSEEMYDIFGKYGAIRQIRLGNAKDTRGTAYVVYEDIYDAKNAVDHLSGFNVANRYLIVLYSQLNRMSKKTDIKKKEDEITRLQEKYGVGSKTPSANDA
tr|A0A219TZZ7|A0A219TZZ7_WHEAT	TraesCS1B02G290600	Delta-1-pyrroline-5-carboxylate synthase OS=Triticum aestivum OX=4565 GN=P5CS PE=3 SV=1	1.7423	5.706128e-06	MAGADPNRSFMKDVKRIIIKVGTAFITKNDGRLALGRIGALCEQVKDLNAQGYEVIMVTSGAVGVGRQRLRYRKLVNSSFADLQKPQMELDGKACAAVGQSGLMALYDMLFTQLDVSSSQLLVTDSDFDNSNFRERLRETVESLLELRVIPIFNENDAISTRKAPYEDSSGIFWDNDSLAGLLALELKADLLVLLSDVDGLYSGPPSEPSSKLIHTYIKEKHYHEITFGDKSRVGRGGMTAKVQAAVWASTGGVPVVITSGCASQSLVKVLRGEKIGTLFHKNASLWEPSKDTSVREMAVAARDCSRRLQNLTSKERKKILLDVADALEANEDLIRSENEADLAAAHEAGYESALVSRLTLKPGKIASLAKSVRTLANMEDPINEILKRTEVADGLVLE…
tr|B1GXL6|B1GXL6_WHEAT	TraesCS7B02G431200	Puroindoline b-like protein 2v2 OS=Triticum aestivum OX=4565 GN=pinBv2 PE=2 SV=1	2.38378	1.418173e-06	MKTLFLLALLSLVVSTTFAQYKEVGGSYENGGRGFGSQNCPPEKTKLDSCKDYVMERCLAVKGFSIARLLKWWKGACEQEALDQCCQQLRPVVKKCRCEAIWRAVQGNLGGVFGFQQGKITKQIQRAMMLPSKCKMDSSCKFVHTNGYYY
tr|A0A3B5YSU3|A0A3B5YSU3_WHEAT	TraesCS1B02G090500	Glutamate--cysteine ligase OS=Triticum aestivum OX=4565 PE=3 SV=1	1.51014	1.301307e-10	MAVASRLAVVRVVQPDGGAAGGSRKGRQGFAVVGLPAAGRRGRRRGGAVAASPPTEEAAKLTEPLTKEDLVAYLASGCKPKENWRIGTEHEKFGFDVETLRPITYDQISAILNGLSERFEWDKIMEENHVIGLKQGKQNISLEPGGQFELSGAPLETLHQTCAEVNSHLYQVKAVGEELGVGFLGMGFQPKWALADIPIMPKGRYEIMRNYMPKVGTLGLDMMFRTCTVQVNLDFSSEQDMIRKFRASLALQPIATAIFANSPFKEGKPNGFLSLRSHIWTDTDNNRSGMLPFVFDDSFGFEQYVDYALDVPMYFVYRNKTYIDCTGMSFRDFMAGKLPQVPGELPTLNDWENHLTTIFPEVRLKRYMEMRGADGGPWRRLCALPAFWVGLLYDDESLQ…
tr|A0A3B6TDT1|A0A3B6TDT1_WHEAT	TraesCS7D02G248900	UVR domain-containing protein OS=Triticum aestivum OX=4565 PE=4 SV=1	1.53363	1.779181e-05	MASQDGGWGDGGDSLFEGMVLFAPADPAAAEAEEAPEPPKPPTPPPAAAAASDAESSATSQPLDEDLFSDLTLLAPQPPLDQDQHPQPQAQDQNHRPASPVAVTPPPAAAALSRQPSSSSLRKKKRAVRIGYGRSPQTAPALPPTVPIANTAAPAAAAATATVLRTTSSSSSLSDASTYDAIPPIPIQYLDQLGNDDERDAAVVDPDANSLDAISVNSLDAKQEAKEEDGGKDAGEAVVAVVGIEERLALLRSQISSKLDSIQQSAAAVAAKRRQLAGRQRKVAEDVGSAASRHKDLERELEEACEAEDFERAERISDSLAALEKDKDRLLTALRDAELDYDSVDLELQDVLESRIAVEEEAAALLEQFAKDATEHADSVSKQAEEMSSKEIEGWQTSM…
tr|A0A3B6B2Q2|A0A3B6B2Q2_WHEAT	TraesCS2A02G358900	Uncharacterized protein OS=Triticum aestivum OX=4565 PE=4 SV=1	1.63406	0.00257165	MACYAALLHQPPASPSPCTSGRAGSCRVRPPPLLQRRAPPLSARARISPRCSYAAAGGSAGAGAGEQPAAALRRVLETPGAHQAPACYDALSARLVERAGFRACFTSGFSISAARLGLPDVGLISYGEMIDQGRLITEAVSIPVIGDADNGYGNCMNVKRTVKGFINAGFAGIILEDQVSPKACGHTQGRKVVSREEAIMHIKAAVDARKESGSDIVIVARTDSRQALSLDEALWRARAFADAGADVLFIDALASREEMMAFCAVSPGVPKMANMLEGGGKTPILSPLELEEIGYKIIAYPLSLIGVSMRAMEDVLVAIKGGRIPPPSSLPSFEEIKDTLGFNRYYEEEKRYVASPAQSSFGSASSSGDTKSRTEKSQEPIIDILPQLYDPGSAGGRGP…
tr|A0A4D6K428|A0A4D6K428_WHEAT	TraesCS1A02G007405	Gamma gliadin storage protein OS=Triticum aestivum OX=4565 PE=4 SV=1	1.64418	2.001352e-06	MKTLFILTILAMATTIATANMQVDPSGQVQWPQQQPFRQPQQPFYQQPQKTFPQPQQTFPHQPQQQFPQPQQPQQQFPQPQQPQQPFPQPQQAQLPFPQQPQQPFPQPQQPQQPFPQSQQPQQPFPQPQQPQQSFPQQQQPLIQPYLQRQMNPCKNYLLQQCNPVSLVSSLVSMILPRSDCQVMQQQCCQQLAQIPRQLQCAAIHSVVHSIVMQQEQQQGIQILRPLFQLVQVQGIIQPQQPAQYEVIRSLVLRTLPNMCNVYVRPDCSTINAPFASIVAGISGQ
tr|D3UAL7|D3UAL7_WHEAT	TraesCS1B02G011600	Low molecular weight glutenin subunit B3-2 (Fragment) OS=Triticum aestivum OX=4565 PE=4 SV=1	1.98996	7.11496e-06	IPFVHPSILQQLNPCKVFLQQQCSPVAMPQSLARSQMLQQSSCHVMQQQCCQQLPQIPQQSRYEAIRAIIYSIILQEQQQVQGSIQSQQQQPQQLGQCVSQPQQQSQQQLGQQPQQQQLAQGTFLQPHQIAQLEVMTSIALRTLPTMCRVNVPLYRTTTSVPFG
tr|A0A3B6RJF0|A0A3B6RJF0_WHEAT	TraesCS7A02G291600	CS domain-containing protein OS=Triticum aestivum OX=4565 PE=3 SV=1	1.67942	1.289469e-06	MSRHPEVRWAQRIDKVYITVQLPDAKDAKVNLEPDGVFSFFATAGTDGNSYESKLDLNDKVNVEASKVSVGVRSIFCILEKADAKWWNKLVRDDQKAPHFVKVDWDKWVDEDDDGADVNVDGMDFSNMGGMGGMPGMEGLGGMGGMGGMPGMEGLGGMGGLAGMMGGMGGMGGMGMPPGMEGLGGMGMDDFEDESDDEGEVSKPQDAGKSDAAEISEVEGKAGTAAQSN
tr|A0A3B6AY87|A0A3B6AY87_WHEAT	TraesCS2A02G234800	Uncharacterized protein OS=Triticum aestivum OX=4565 PE=4 SV=1	1.51962	2.260854e-05	MTSPASTSSWFSGIVRTASGNPPSSAMPPAGGVTSAPVSLPDTPAAVSGKGGVVAPVATTGVCARRKQLQGTLFKYGPKSAQVAFRTRDFTRQVIFIGGLADGLLATDYLEPLSLALEVEKWSLVQPLLSSSYTGYGISSLEQDALELDQLIGYLINKDNSEGVILLGHSTGCQDIIHYMQTNFACSKAVSGVILQAPVSDREYRATLPETGEMIDLAAKMISAGRGMDLMPREANSDAPITAYRFHSLCAYMGDDDMFSSDLSEDQLKQRLGHMSTTQCLVIFSMADEYVPEYVDKKALVDRLCRALGDSEKVEIKWGNHALSNRVQEAVEVIVDFVKREGPKGWDDPWS
tr|A0A3B6I054|A0A3B6I054_WHEAT	TraesCS4A02G278900	Germin-like protein OS=Triticum aestivum OX=4565 PE=3 SV=1	1.55266	0.00676895	MVYSKTIACMFTMLLLAPAIMATDPDPLQDFCVADLDDNAVRVNGYPCVPQSEAGDDFLFSSKLARGGNTSTPNGSAVTRLDVTEFPGENTQGISMNRVDFAPGGTNPPHIHPRATEIGLVVKGELLVGIIGSNESGNRLYSRVVRAGENFLIPRGLMHFQFNTGDTVATMFVSFNSQNPGIVFVPLTLFGSDPPIPTPVLTRALRVDAGVVELLKSRFAGGS
tr|A0A3B6TC30|A0A3B6TC30_WHEAT	TraesCS7D02G191300	Uncharacterized protein OS=Triticum aestivum OX=4565 PE=4 SV=1	1.82042	1.110149e-06	MATAYNLRSRDEPDDFDEFDSTPYGGGYDLFVTFGRPLPPSDETCYPCSAPSTSYDAPHYAAEEPSPYAHHQKPQPAYGFRPQNEQQQQPSYGREDDDSGYVSKPKPKPQPAYGFRPQAEEEQRPSYGGGGEEDDSGYGSKPQPAYGFRPQQEEQPAYGSGYGSKPQRSQEDTYGSGYGRKPQQEEPAYGSGYGSGYGRKPQAEESYGSGYGNTTQPEEGYGSGYGSKPQVEQTYGGSEYGSGYGRKPQVEESYGSGYGSRPQGGEEYGSAGYGGRKTEEEGYGGSGYGSGRKVQEEDEGAYGSGGYQKPKPYGEETQASYGGGYEKPSYGGGNYGRKKQDDDSDDEKKNRYAKRDDSDDEKERYEKHHHHRRHNYDD
tr|A0A3B6INS5|A0A3B6INS5_WHEAT	TraesCS4B02G072100	Uncharacterized protein OS=Triticum aestivum OX=4565 PE=4 SV=1	2.40508	3.892456e-07	MGNHQKILNFLRSDPAAVAACSPRSFSSSSASVSDDDGYSCSSYPTTDGDASPSRYGGSSTPPTPKSPWAHLPGLGAGGAVAEPGATGLIASLVKEDGHVYSLAATGDVLYTGTNSPNVRVWRDQRELAGFRTASGLVKAIVVADDGRIFTGRQDGKVRVWRADADNPAVHRQVGSLPKLKDYLKCAVNPTSYVETQRRGRQRAVWLRHSDAVSSLSLDEGAGLLYSASWDRTFKVWRVSNSKCLESVSAHDDAVNTVAAAGFDSVVFTGSADGTVKVWRREMAAKGDATKHVLKTVLRKGEGAVTAIAVSPEDRVVYVGSSDGLVTYWHWVDGEARYGGVLKGHKTAVMCLAVAGNVVVSGSADRTLCVWGRDGAEHVGLGVLAGHTGPVKCVAMDEE…
tr|A0A3B6RAC4|A0A3B6RAC4_WHEAT	TraesCS7A02G010400	Uncharacterized protein OS=Triticum aestivum OX=4565 PE=4 SV=1	1.56789	7.275125e-05	MGSDDSGRGSIAFFGTYRPPVPLDIYSCPADPPPSSRKDELHLTDGVSYNQNGRAIPAPALKELLTFLGKKNPALAAECGATPDDAEKGRVAGLVFVSERDKGLETLHVALVRPKGEGGAVKVLSLGDVYGADTFGGSRMEDSGCIAGGFKVGARTVGHSLVYVSTKEPVTRRRTPWTVVYRTNLADGKTERLTPPGQYDVSPAVSPSGKMVAVANFRGNKWTGEIERLNTDIAVMNVDKTAQGGLRRRILIRDGGWPTWGSDNVIFFHRGTGESPTNWAVFRYDIATKETVRVTPEAIDAMTPAAISETRVAVAAIRQKSRQAAMTTPREEAQYRHIEIFDVASPDRPAVQISQKIRPKGDHYNPFVADGGSRIGYHRVRTDDLVIGNNLSAPTKSFD…
tr|A0A3B6MTB1|A0A3B6MTB1_WHEAT	TraesCS5D02G253700	Glucose-6-phosphate isomerase OS=Triticum aestivum OX=4565 PE=3 SV=1	2.22947	1.873096e-10	MASISGAAAPPSSSSACRLRLRRQLLMRPSHLRLRAPHSIADLSRSSHSHAPAPPLASRAPAQGGGAVEKDPIKLWDRYVEWLYQHKQLGLFVDVSRMGFTDDFLQRMEPLMQRAFVAMGELEKGAIANPDEGRMVGHYWLRDPGLAPNSFLRTKIEKTVDHILAFSQDIVSGKIKPPSSQVGRFTQILSIGIGGSSLGPQFVSEALAPDNPPLKIRFIDNTDPAGIDHQIAQLGEELKSTLVIVISKSGGTPETRNGLLEVQKAFRDAGLDFSKQGVAITQENSLLDNTARIEGWLDRFPMFDWVGGRTSELSAVGLLPAALQGIDVKEMLVGAALMDEETRNTVVKENPAALLALSWYWATDGIGSKDMVVLPYKDSLLLLSRYLQQLVMESLGKEY…
tr|A0A3B6C720|A0A3B6C720_WHEAT	TraesCS2B02G311100	Ferredoxin OS=Triticum aestivum OX=4565 PE=3 SV=1	2.87371	1.677827e-08	MATTFAAPILCNLRANPRLNHSTRQQPRHLHLSSARMAPTLTGSRARSDFRAAAVYKVKLIGPEGKESVIEVAEDSYILDAAEEAGVELPYSCRAGACSTCAGKVLEGGVDQSDQSFLDDAQVSAGYALTCVAYPTSDLVIQTHKESDLY
tr|A0A1G4P1V3|A0A1G4P1V3_WHEAT	TraesCS1A02G317311	HMW glutenin x-type subunit 1Ax21 OS=Triticum aestivum OX=4565 GN=Glu-1Ax PE=3 SV=1	1.52474	0.000712066	MTKRLVLFAAVVVALVALTAAEGEASGQLQCERELQEHSLKACRQVVDQQLRDVGPECQPVGGGPVARQYEQQVVVPPKGGSFYPGETTPPQQLQQSILWGVPALLRRYYLSVASPQQVSYYPGQASSQRPGQGQQEYYLTSPQQSGQWQQPGQGQPGYYPTSPQQPGQKQPGYYPTSPWQPGQLQQTTQGQQRQQPGQGQQLRQGQQGQHPGQGQPRYYPTSSQQPGQVQQLVQGQQGQQPERGQQGQQSGQGQQLGQGQQGQQPEQKQQSGQGQQGYYPTSLQQLGQGQQSGQWQQGYYPTSPQQSGQGQSGYYPTSLQQSGQLQQLTQGHQLGQEQQDQQSGQGRQGQQSGQRQQDQQSGQGQQPGQRQPGYYSTSPQQLGQGQPRYYPTSPQQPG…
tr|A0A3B6EDF0|A0A3B6EDF0_WHEAT	TraesCS3A02G122900	Ubiquitin carboxyl-terminal hydrolase OS=Triticum aestivum OX=4565 PE=3 SV=1	2.46017	2.761782e-08	MDLLRANLHKVRIPEPTNRIHKDECCVSFDTPRSEGGLYVDMNSFLGFGREHVAWNFEKSENPVYLHIVQRRKPEPDETDRPLKKPTLLAIGMEGGFGEQEPEYDVTYKIVILPEFLSLPFPSVDLPEKVRLAVDKVILAESADRKQQLASWVADKKIISAHAMDLQQLDNGVIVPPTGWKCSKCDKTENLWLNLTDGMILCGRWVWDGTGGNNHAVEHYQQTKYPLAVKLGTITADLEGADVYSYPEDDSVEDPILAQHLSHFGIDFSSLQKTEMTTAERELDHNTNFDWNRIQESGKDAEPLYGPGYTGLVNLGNSCYMASVMQVMFSTHPFISRYFEKQSLKAAFAISKADPTLDLNMQMTKLAHGMLSGKYSAPSQEGQEGIRPRMLKSVIAASH…
tr|A0A3B6EAX7|A0A3B6EAX7_WHEAT	TraesCS3A02G022800	Uncharacterized protein OS=Triticum aestivum OX=4565 PE=4 SV=1	1.73482	1.791874e-06	MATSKKVVTREEWEGKLRDVKIRKEDMNRLVMNFLVTEGFVDAADRFRVESGTRPEIDLATITDRMEVKKAVQSGNVQEAIEKINDLNPTILDTNPEIYFHLQQQKLIELIRVGKIHEALEFAQEELAPRGEENIAFLEEIEKTVALLVFEDVKNCPYGELLDVSQRLKTASEVNAAILTSQSHEKDPKLPSLLKMLIWAQNQLSEKAAYPQINNLSTADLEDPAI
tr|A0A3B5XV61|A0A3B5XV61_WHEAT	TraesCS1A02G076100	Uncharacterized protein OS=Triticum aestivum OX=4565 PE=3 SV=1	2.10871	1.052255e-07	MEGVACLVGECRLLLQAVCQVLSRTRGVRSNSSTEILQGLLEMGIRGVTVSDVRGYGAQGGSTERYEGSEFSEDTFIAKVKMEIVVCKEQVEPVIDKIIEKARTGEIGDGKIFLIPVADVVRVRTGERGVHAERMIGGLSDKLPPVITIS
tr|A0A3B6EPW4|A0A3B6EPW4_WHEAT	TraesCS3A02G484500	Histone H3 OS=Triticum aestivum OX=4565 PE=3 SV=1	2.55469	6.770274e-06	MARTKQTARKSTGGKAPRKQLATKAARKSTPTTGGVKKPHRYRPRTVALREIRKYQKSTELLIRKLPFQRLVREIAQDFKTDLRF
tr|A0A5B9Y471|A0A5B9Y471_WHEAT	TraesCS1D02G001100	Gamma-gliadin OS=Triticum aestivum OX=4565 PE=4 SV=1	2.61485	3.655253e-10	MKTLLIVTILAMATTIATANMQVDPGYQVHWPQQQPFLQPQQPFCQQPQQTIPQPHQTFHHQPQQTFPQPQQTYPHQPQQQFPQTQQPQQPFPQPQQTFPQQPQLPFPQQPQQPFPQPQQPQQQFPQSQQPQQPFPQPQQQFPQPQQPQQSIPQQQQPLIQSSLQQQMNPCKNFLLQQCNPVSLVSSLVSLILPRSDCQVMQQQCCQQLAQIPHHLQCAAIHSVAHSVIMQQQQQQGIQILRPLFQIVQGQSIIQQQPAQLEVIRSLVLKTLPTMCNVYVRPDCSNIRTPFASTIAGIGGQ
tr|A0A3B6KQ24|A0A3B6KQ24_WHEAT	TraesCS5A02G460900	RRM domain-containing protein OS=Triticum aestivum OX=4565 PE=4 SV=1	1.8271	3.739741e-06	MAFLQKVGNALKRSAGSGSAMLQAVRSMSSAKVFVGGISYGTDDQSLADAFSNYGQVVESKVIMDRESGRSRGFGFVTYTSAEEAGAAITGMDGKDLQGRIVRVSYAHDRGSRPSFGGGGGYGSGGGYGGADGGYGGGGGSYGGGGGYSGGGGYGGGGRGGGGGGYNSGGNYNSGYNSGGNYGAPQGGQGGYGGDAGFTGVGGGGYNAAPANNYGGDSLNQGGGAPPAFGGRNFGAGNDSYANDAPVDLPPGKLDDLLKDLKFDVGGKEDGAVEGDADTKRSEGQDDFLDDDFSKDEDDYANKRS
tr|I6QF63|I6QF63_WHEAT	TraesCS3A02G033900	Small heat shock protein OS=Triticum aestivum OX=4565 GN=Mds1 PE=3 SV=1	1.58369	3.985715e-06	MSIVRRSSVFDPFADLWADPFDTFRSIIPAISGGNSETAAFANARMDWKETPEAHVFKADLPGVKKEEVKVEVEDGNVLVVSGERTKEKEDKNDKWHRVERSSGKFVRRFRLPEDAKVEEVKAGLENGVLTVTVPKAQVKKPEVKAIQISG
tr|A0A3B5Y6B4|A0A3B5Y6B4_WHEAT	TraesCS1A02G402800	Eukaryotic translation initiation factor 3 subunit D OS=Triticum aestivum OX=4565 PE=3 SV=1	1.6821	3.306408e-10	MGFDVGVVPFNPDGWGPPDAPGAAPLLGGAVATASIPFAPFSRSDKLGRIADWTRNPGHPGAHGHHAAAASRDSVFDFSSADDSLAAAAEDSSFSLVDAKPPPKHPRFGPKWRFNQRPQLPQRRDEEVEAKRREAEKERARRERHYQNHRSHHHQGFRGNQQNTAKPSVDIQPDWTILEQIPFANFTKLSFAVNDQPEDLLVCGAVDSYDRTYDRVNPKTARRLERFKNRQFFKITTTDDPIIRRLAEEDKATVFATDAILAALMCTPRSILSWDIVVQRVGNKLFFDKREGSQLDLLTVNETAQEQLPENKDDINSAPALAVEATYINQNFSQQVLVRDGEKVTFDEPNPFASENEEAAPVCYRYRRWKLDDDISIIARCEVHAAGVDPTGARQFLTL…
tr|A0A3B6PL49|A0A3B6PL49_WHEAT	TraesCS6B02G177400	Ubiquitin receptor RAD23 OS=Triticum aestivum OX=4565 PE=3 SV=1	1.52645	1.843724e-07	MKLTVKTLKGTHFEIRVQHNDTIMAVKKNIEEIQGKDSYPWGQQLLIHNGKVLKDESTLDENQVSEDGFLVVMLSKSKASASSGASSAQPSSTPVTSQAPPVAQPQAPQPQTPSSTVDLAASDLLSGSNLDTMINQIMEMGGGSWDRDKVQRALRAAYNNPERAIDYLYSGIPVTAEVAVPVVGQGANTTDAAPGETGFSGIPNTAPLDLFPQGASHAGGAAGGGSLDFLRNNQQFQALREMVHTNPQILQPMLQELSKQNPQLLRLIQENNDEFLQLLNETFDGGDGDFLDQADQDEMPHAISVTPEEQEAIGRLEAMGFERARVIEAFFACDRNEQLAANYLLEHAGDEE
tr|A0A3B6JEF0|A0A3B6JEF0_WHEAT	TraesCS4D02G070200	Dihydrolipoyllysine-residue succinyltransferase OS=Triticum aestivum OX=4565 PE=3 SV=1	1.51292	3.185984e-06	MASRLASRLLLRRPAAVLSLLQSSRHARHFSTQLLEGVPRLPKPTCERYFLRNASPYQIWSRSFASENGDLVEAVVPFMGESVTDGTLANFLKKPGDRVEADEAIAQIETDKVTIDVSSPEAGVIEKFIASEGDTVTPGTKVAVISKSAAPSEAHVAPSEETSQKETPPPPPAEKPKVEAKSPKVESVKPQASKLASPSEPQLPPKERERRVSMPRLRKRIANRLKDSQNTFALLTTFNEVDMTNLMKLRTDYKDEFVKKHGVKLGLMSCFVKAAVSALQNQPIVNAVIDGDDIIYRDYIDVSVAVGTSKGLVVPVIRDTEGMNFADIEKGINSLAKKATEGALSIDEMAGGTFTISNGGVYGSLISTPIINPPQSAILGMHSIVQRPVVVDGSILARP…
tr|A0A3B5Z5F1|A0A3B5Z5F1_WHEAT	TraesCS1B02G432200	Eukaryotic translation initiation factor 3 subunit D OS=Triticum aestivum OX=4565 PE=3 SV=1	1.9007	4.980255e-09	MGFDVGVVPFNPDGWGPPDLPGAAPLLGGAVATASIPFAPFSRSDKLGRIADWTRNPGHPGAHGHHGAAAVSRDSVFDFSSADDSLAAAAEDSSFSLVDAKPPPKHPRFGPKWRFNQRPQLPQRRDEEVEAKRREAEKERARRERHYQNHRSHHHQGFRGNQQNTAKPSVDIQPDWTILEQIPFANFTKLSFAVADQPEDLLVCGAVDSYDRAYDRVNPKTARRLERFKNRQFFKITTTDDPIIRRLAEEDKATVFATDAILAALMCTPRSILSWDIVVQRVGNKLFFDKREGSQLDLLTVNETAQEQLPENKDDINSAPALAVEATYINQNFSQQVLVRDGEKVTFDEPNPFASENEEAAPVCYRYRRWKLDDDISIIARCEVHAAGVDPSGARQFLT…
tr|A0A1D6BYQ7|A0A1D6BYQ7_WHEAT	TraesCS7D02G157200	AAA domain-containing protein OS=Triticum aestivum OX=4565 PE=3 SV=1	1.92637	8.059023e-08	MAPEPEDDFLNEKNPRPLDEDDIALLKTYGLGPYSNSIKKVEKEIKEMAKKINDLCGIKESDTGLAPPSQWDLVSDKQMMQEEQPLQVARCTKIISPNTDDAKYVINVKQIAKFVVGLGDKVSPTDIEEGMRVGVDRNKYQIQIPLPPKIDPSVTMMTVEEKPDVTYNDVGGCKEQIEKMREVVELPMLHPEKFVKLGIDPPKGVLCYGPPGTGKTLLARAVANRTDACFIRVIGSELVQKYVGEGARMVRELFQMARSKKACIVFFDEVDAIGGARFDDGAGGDNEVQRTMLEIVNQLDGFDARGNIKVLMATNRPDTLDPALLRPGRLDRKVEFGLPDLEGRTQIFKIHTRAMNCERDIRFELLARLCPNSTGADIRSVCTEAGMYAIRARRKTVTE…
tr|A0A3B6JP09|A0A3B6JP09_WHEAT	TraesCS4D02G265700	PCI domain-containing protein OS=Triticum aestivum OX=4565 PE=3 SV=1	1.72778	9.44416e-09	MDVQMGEPQAAPPPAAAAAAPAPSTIQHLKEIAAVIEAGSVTKEVRRISRAVRLTVALRRRLAARDVSAFLAFALPANSDAYARLTPLLPKEDEAEMDIDAAAPATQISIKHGLPEIEIYCSLLVLIFLIDQKKYDEAKACATGSIARLKNLNRRTVDVLASRLYFYYSYVYELTNTLAEIRGNLLGLHRMATLHHDELGQETLLNLLLRNYLHYNLYDQAEKLRSKAPRFEAHSNQQFCRYLFYLGKIRTIQLEYTDAKESLLQAARKAPAAARGFRIQCNKWAIIVRLLLGEIPERTVFMQKGMKEALAPYFELTNAVRIGDLELFRAVADKFASTFSADRTHNLIVRLRHNVIRTGLRNISISYSRISLADIAKKLRLDTENPVADAECIVAKAIR…
tr|Q08837|Q08837_WHEAT	TraesCS1D02G067100	Triticin (Fragment) OS=Triticum aestivum OX=4565 PE=2 SV=1	1.6427	0.000172288	MAATSFASLSFYFCILLLCHSSMAQLFGMSFNPWQSSHQGGFRECTFNRLQASTPLRQVRSQAGLTEYFDEENEQFRCTGVFAIRRVIEPRGYLLPRYHNTHGLVYIIQGSGFAGLSFPGCPETFQKQFQKYGQSQSVQGQSQSQKFKDEHQKVHRFRQGDVIALPAGIVHWFYNDGDAPIVAIYVFDVNNYANQLEPRHKEFLFAGNYRSSQLHSSQNIFSGFDVRLLAEALGTSGKIAQRLQSQNDDIIHVNHTLKFLKPVFTQQRDAESRTLNMRKGNLRQNTLRKSNLKWGSHRKSNLKWGSHRESSLKWGSLRQSTQGEQPQMGWSQAKHSQGDQPEEGQGGQSQQEQSQAGPYPGCQPHAGRSHASQSTYGGWNGLEENFCDHKLSVNIDDPS…
tr|Q6Q7J1|Q6Q7J1_WHEAT	TraesCS1B02G329711	High-molecular-weight glutenin subunit 1Bx23 OS=Triticum aestivum OX=4565 PE=3 SV=1	1.6123	0.00820849	MAKRLVLFAAVVVALVALTAAEGEASGQLQCERELEACQQVVDQQLRDVSPGCRPITVSPGTRQYEQQPVMPSKAGSFYPSETTPSQQLQQMIFWGIPALLRRYYPSVTSSQQGSYYPGQASPQQSGQGQQPGQGQQPEQRQQDQQPGQRQQGYYPTSPQQPGQGQQLGQGQPRYYPTSQQPGQKQQAGQGQQSGQGQQGYYPTSPQQSGQGQQPGQGQSRYYPTSPQQSGQWQQPGQGQQPGQGQQLGQGQQGQQPGQGQRPGQGQQGYYPTSPQQPGQGQQSGQGQPGYYPTSLRQPGQWQQPGQGQQPGQGQQGQQPGQGQQPGQGQGGYYPTSLQQPGQGQQPGQGQSGYYPTSQQSEQGQQPGQGKQPGQGQQGYYPTSSQQSGQGQQLGQGQP…
tr|A0A3B6JNG2|A0A3B6JNG2_WHEAT	TraesCS4D02G339500	Uncharacterized protein OS=Triticum aestivum OX=4565 PE=3 SV=1	2.12467	2.451179e-07	MPAGHGLRSRTRDLFARPFRKKGYIPLTTYLRTYKVGEHVDVKVNGAVHKGMPHKFYHGRTGRVCNVTKRAIGVEINKQVGNRIIKKRIHVRVEHVQPSRCNEEFLQRKLNNDKLKAEAKARGEVISTKRQPAGPKPGFMVEGTTIETVTPIPYDVVNDLKGGY
tr|A0A5B9Y1T4|A0A5B9Y1T4_WHEAT	TraesCS1D02G001000	Gamma-gliadin OS=Triticum aestivum OX=4565 PE=4 SV=1	1.51635	1.372313e-05	MKTLLILTILAMAITIGTANMQVDPSSQVQWPQQQPVPQPHQPFSQQPQQTFPQPQQTFPHQPQQQFPQPQQPQQQFLQPQQPFPQQPQQPYPQQPQQPFPQTQQPQQLFPQSQQPQQQFSQPQQQFPQPQQPQQSFPQQQPPFIQPSLQQQVNPCKNFLLLQCKPVSLVSSIVSLILPRSDCQVMQQQCCQQLAQIPQHLQCAAIHSVVHSIIMQQQQQQQQQGLQILRPLFQIIQGQSIIQQQSTQLEVIRSLVLKTLPTMCNVYVRPDCSTIRTPFASTVDGIGGQ
tr|A0A3B6DIW5|A0A3B6DIW5_WHEAT	TraesCS2D02G427700	26S proteasome non-ATPase regulatory subunit 1 homolog OS=Triticum aestivum OX=4565 PE=3 SV=1	1.99561	3.8821e-11	MAAVATVSSAGGILAMLHEPAEELKLHALASLNSVVHLFYPEISTSIPTIESLYEDEEFDQRQLAALVVSKVFYYLGELNDALLYALGAGPLFDVSEDSDYAHALLAKALDEYASFKTRASKATEEEENVDPRLEAIVERMLEKCVLDGKYQQAMGMAVECRRLDKLEEAIVRCDNIHGALSYCINLSHQYVSHREYRCEVLRCLVKIYQTLPHPDFLSICQCLMFLGEPETVANILDTLISGSKDDALLAYQIAFDLVENENQAFLLNVRNRLDSQTPEPAGDVQMGDDTTTANGNAHPVDPNEAAHADKLAKLKGILSGEKSIQLTLQFLYSHNRSDLLILKTIKQAVEMRNSVCHSATICSNAIMHAGTTVDTFLRENLEWLSRATNWAKFSATAG…
tr|A0A3B6TSI9|A0A3B6TSI9_WHEAT	TraesCS7D02G317400	Uncharacterized protein OS=Triticum aestivum OX=4565 PE=4 SV=1	2.63524	8.888821e-09	MADSDASAPPPEVATEMKIPVVDLTDAVQEDAASDPAAAAPTQEEAPSEVADAEGDHKRKLEEVDAGAEANGAGEDAKRPRVEGNGADAVQNSESSEKPEEPVAVITEGAADAEVAPTGDLQTSSEVKPQETATQALPQQQEGDATGALQETTRLIDVPNTKVGVLIGKAGETIRNLQMSSGAKIQITKDADVPSDATTRPVELVGTNESIDKAEQLIKSVIAEAEAGGSPALIAKGFGSGQSGSEQFEMLVPDNKVGLIIGKGGETIKNLQTRSGARIQLIPQHPPAGTTLTERTVRVTGNKKQIEAAKELIKQAMSQTFPRNTTQSGGYGPQHHHPQGHGPASQWGPRSQPQQYGYPPRGPPQNAPYSQPPYGGYPQQPPPRGGMGWDQRQGPPPHQ…
tr|A0A3B6KCD0|A0A3B6KCD0_WHEAT	TraesCS5A02G015800	WAT1-related protein OS=Triticum aestivum OX=4565 PE=3 SV=1	2.2285	0.00020508	MDWKPTVMMIAVVIMYAVLNVLTKMAFNEGMHTTVFIVLRLLVAALFLSPIAYFKERKSRPKLTMEIFVYLFFSALLGASLIQWLFFLGLRYTTATFASAFNNTTPMFTFLLALAFKVEKIDVASRSGAAKLTGTAVGLAGAAVLALYHGPTLMGAPSGDHMDSTATHGGARRWAVGSVALLGFSASWSLWFILQSKIGTKYPALYSGTAWMFVLSFIQMATVGAATEKMNLQIWVPRTALQAVTVVFAGVGSSGLGFLVMSWCVERRGPVFTTAFMPLIQIVTAGLDVTVLHEQLHLGSVVGSAVVVVGLYLVLWGKSNEASIGSKLPA
tr|A0A3B6QNG6|A0A3B6QNG6_WHEAT	TraesCS6D02G356600	Uncharacterized protein OS=Triticum aestivum OX=4565 PE=3 SV=1	1.59611	6.428051e-08	MLLSCVLLHALLAGPAEGLVRVPLTKRPVDEDGPVVAGEDAQRLLAWRHGLVYNADVPTTGEKGHAVALKNHLNAQYYGEVGVGTPPQNFTVIFDTGSADFWVPSSKCFLSIGCYLHASYKASKSATYKKNGKRVALRYGTGAISGYLSQDNVQVGGVVVKNQDFIEATREPSITFMFRKFDGILGLGFKEIARGGVEPVWYNMVNQHLVGSPVFSFWFNRHAGEGHGGEIVFGGIDPKHHKEEHKYVPVTKKGYWQFDMGDVLIGGKSTGLCTSRCAAIADSGTSLLVGPTAIITQINEKIGAPGIFSQECKEVASQYRQRILDLLLNEIDPTKICPSVGLCTHSGTQGVSFGIRTVVDDETGRSNDAVCHVCEMAVMWAKNQLAQDQTRDLILKYIN…
tr|A0A3B6MT71|A0A3B6MT71_WHEAT	TraesCS5D02G258900	HATPase_c domain-containing protein OS=Triticum aestivum OX=4565 PE=3 SV=1	1.73505	1.513727e-09	MAPALSRTLGPSSVAALRPSPSRGLLRAALAPQGRRPAGARGVRWEAGRGRLVGARCASAVAEKTAGEEEEAAGEKFEYQAEVSRLMDLIVHSLYSHKEVFLRELVSNASDALDKLRFLSVTDPSVLADGGDMEIRIKPDPDAGTITITDSGIGMTKDELKDCLGTIAQSGTSKFLKALKENKELGADNGLIGQFGVGFYSAFLVAEKVVVSTKSPKTDKQYIWEAEANSSSYVIREETDPEKMLTRGTQITLFLREDDKYEFADPTRIQGLVKNYSQFVSFPIFTWQEKSRTVEVEEEESKEAEETAEGEKEKKKKTITEKYWDWELANETKPIWMRNPKEVEETEYNEFYKKAFNEFLDPLAHAHFTTEGEVEFRSVLYIPGMAPLSNEEIMNPKTK…
tr|A0A1D5YNP5|A0A1D5YNP5_WHEAT	TraesCS5A02G554700	Small nuclear ribonucleoprotein Sm D3 OS=Triticum aestivum OX=4565 PE=3 SV=1	2.00018	2.914815e-06	MSRSLGIPVKLLHEAAGHVVTVELKTGEVYRGSMIECEDNWNCQIENITFTAKDGKVSQLEHVFIRGSRVRFMIIPDMLKNAPMFKRLEARIRGKGSAIGVGRGRAVAMRARAAGGRGGGPPVGGGRGGAPPVRR
tr|A0A3B6NX30|A0A3B6NX30_WHEAT	TraesCS6A02G372500	Uncharacterized protein OS=Triticum aestivum OX=4565 PE=3 SV=1	2.51257	8.52478e-07	MAAAGHLMLLSCVLLHALLANPAEGMVRVALTKRPVDEVDGPVVAGEDAQRLLAWRHGLVYNADVVPTKGAESHVVALKNHLNAQYYGEVGVGTPPQNFTVILDTGSADFWVPSSKCFLSIGCYLHASYKASKSTTYKKNGKRIALRYGTGAISGYLSQDNVQVGGVVVKNQDFIEATREPSITFMFRKFDGILGLGFKEIARGGVEPVWYNMVNQHLVGSPVFSFWFNRHAGEGQGGEIVFGGIDPKHHKEEHEYVPVTKKGYWQFDMGDVLIGGKSTGLCTSRCAAIADSGTSLLVGPTAIITQINEKIGAPGIFSQECKEVASQYGQRILDLLLNEIDPTKICPSVGLCTHSGTQGVSFGIRTVVDDETERSNDAMCHVCEMAVMWAKNQLAQDQT…
tr|W5HXT5|W5HXT5_WHEAT	TraesCS7D02G335000	Uncharacterized protein OS=Triticum aestivum OX=4565 PE=3 SV=1	1.61354	0.000293313	MARGVAAATKGGAGAGKKKGSVTFVIDCTKPVDDKIMEIASLEKFLQERIKVAGGKAGNLGDSVTVARDKSKVTVTSDGAFSKRYLKYLTKKYLKKHNVRDWLRVISSNKDRSVYELRYFNIAENEGEEED
tr|A0A3B6H360|A0A3B6H360_WHEAT	TraesCS3D02G394300	WPP domain-containing protein OS=Triticum aestivum OX=4565 PE=4 SV=1	1.53391	1.78581e-10	MASAAQDFQPRTFSIKLWPPSESTRLMLVERMTKNLSSESIFSRKYGLLGKEEAHKNAKRIEEMCFASADEHFKKEPDGDGSSAVQLYAKETSKLMLEVLKKGPVTTAEPEAPVIDTPIEPADTVFDISGGKRAFIEADEAKELLSPLTEPGNSYSRICLSNRSFGIGAANVAGPILESIKSQLKEVDISDFVAGRPEDEALDVMRIFSKALAGSVLRYLNISDNALGEKGVRAFTELLKSQGDLEELYVMNDGISGEAAKALSELIPSTEKLKVLHFHNNMTGDEGAMFIAEMVKRSPNLESFRCSATRIGSDGGVALAEALGTCTRLKKLDIRDNLFGVEAGVALSETLPKLGDLVELYLSDLNLENEGTIAIVNVLKESAPQLEILEMAGNEITAE…
tr|A0A3B6MXE8|A0A3B6MXE8_WHEAT	TraesCS5D02G343300	B box-type domain-containing protein OS=Triticum aestivum OX=4565 PE=4 SV=1	3.09431	5.686489e-09	MWCELASMCAGDGTRERCACALCGAAADVHCEADAALLCAPCDAQVHGVNFLASRHRRTRVWRPMGVDVLSRTATTSRSCVSTADSATTAALRGRGTTPPARRRGARGEAVLEGWARRMGLEAGAAHRRAAAASRAIRVQVAAAAPRVPLRVAMAAALWSEVAAHGVHEPGEALRRLEACAHVPMRLLVEVAAVSTMGDARAKKRTAAVDADEDSWGECSIVSLDKTPSSPRHELLLFV
tr|S5W634|S5W634_WHEAT	TraesCS2D02G069500	Glycerol-3-phosphate dehydrogenase OS=Triticum aestivum OX=4565 PE=2 SV=1	1.69167	0.00370312	MANSDVVPMIAPSSGVHIVLPDYYSPEGMGLIVPKTKDGRVVFMLPWLGRTVAGTTDSSTAITMLPEPHEDEIQFILDAICDYLNVQVRRSDVLSAWSGIRPLAMDPSAKNTESISRDHVVFEDYPGLITITGGKWTTYRSMAEDAVNAAIRSGNLKPANGCVTDHLHIVGGYGWDPASFTVLAQNYKRMKKTYGGKVIPGAMDSAVSKHLSHAYGTLAERVAAIAQNEGLGKRLAHGYPFLEAEVAYCARHEYCESAVDFVARRCRLAFLDTDAAGRALPRIIEILASEHKWDKARRKLEQQKGIEFLETFKSSKNAQFRDGKHNGQ
tr|W5D2J1|W5D2J1_WHEAT	TraesCS3D02G178500	Importin subunit alpha OS=Triticum aestivum OX=4565 GN=TRAES_3BF077900050CFD_c1 PE=3 SV=1	1.50416	5.657215e-09	MSVRPSERADARRNRYKVTVDADEGRRRREDNMVEIRKNRREESLLKKRREGLQAQAPIPAAGVEKKLESLPAMVGGVYSEDNNLQLEATTQFRKLLSIERSPPIEEVIQSGVVPRFVQFLTREDFPQLQFEAAWALTNIASGTSENTKVVIDHGAVPIFVKLLASGSDDVREQAVWALGNVAGDSPKCRDLVLANGALMPLLAQLNEHAKLSMLRNATWTLSNFCRGKPQPAFDQTKPALPALARLIHSNDEEVLTDACWALSYLSDGTNDKIQSVIDAGVCPRLVELLLHPSPSVLIPALRTVGNIVTGDDSQTQCIIDHQALGCLLSLLTQNHKKSIKKEACWTVSNITAGNKDQIQAVITAGIIGPLVHLLQTAEFDIKKEAAWAISNATSGGSH…
tr|A0A3B5XV46|A0A3B5XV46_WHEAT	TraesCS1A02G075100	Uncharacterized protein OS=Triticum aestivum OX=4565 PE=4 SV=1	1.70186	2.464079e-07	MRSPRLRRQPAPAPARDPHPAEPTEVFPLGEAVEVLPDEGAYRGAHLPAVVARFDPDLRSYAVEYDALAISGASGRALPETVPASQVRPRPPPPSPAPHAEHAPVDALRDGAWWLGVALLGGGRADGKVAVRFPATREEAEFDAADVRPHLEWVAGEWRSPEDMETSKRTPYAKGTHIEVARLEADSVVAWFPAIVAKPIWKNNLLVEYPFGKGSELCNEIINIKHIRPCPPRASVISFCVNDDVEGFQDDGWWPGKITEIHPKLTYTFKLATSGKKVQLHQNTLRLRYDWTDDQWKQVAQNLSGTKFTGGDRVEVSSDEEGFNGAWFQGTVVKSVGHKFLVEYDALKDDDEITPLKETIGEEHIRPSPPAIPVTNGFKVLDEIDAYTNDGWWVGVISE…
tr|A0A3B5YUE8|A0A3B5YUE8_WHEAT	TraesCS1B02G144300	60S ribosomal protein L11 OS=Triticum aestivum OX=4565 PE=3 SV=1	1.86419	4.111226e-05	MIKVQKLVLNISVGESGDRLTRAAKVLEQLSGQSPVFSKARYTVRSFGIRRNEKIACYVTIRGEKAMQLLESGLKVKEYELLRRNFSDTGCFGFGIQEHIDLGMKYDPSTGIYGMDFFVVLERAGYRVSRRRRCKARVGIHQRVTKEDAMKWFQVKYEGVILNKSHAS
tr|A0A3B6AZG4|A0A3B6AZG4_WHEAT	TraesCS2A02G284400	Oxoglutarate dehydrogenase (succinyl-transferring) OS=Triticum aestivum OX=4565 PE=3 SV=1	1.75363	1.105049e-08	MGLFRAASGLARVALRRSLSRAPASPFAGPAPRYFHSTLPRRYAAPEPRAVPLSRLTDSFLDGTSSVYLEELQRAWEADPTSVDESWDNFFRNFVGQAATSPGISGQTIQESMRLLLLVRAYQVSGHMKAKLDPLGLEQRAVPDVLDPAFYGFSESDLDREFFLGVWRMAGFLSENRPVQTLRSVLGRLEQAYCGTIGYEYMHIPDREKCNWLRERIETVNPREYTYDRRQVMLDRLIWSTQFENFLAQKWTTAKRFGLEGAETLIPGMKEMFDRAADLGVESIVIGMPHRGRLNVLGNVVRKPLRQIFSEFSGGTKPVNEGEGLYTGTGDVKYHLGTSYDRPTRGGKHIHLSLVANPSHLEAVDPVVAGKTRAKQYYSNDLDRTKNLGVLLHGDGSFS…
tr|G0Z6F1|G0Z6F1_WHEAT	TraesCS3B02G213500	26S proteasome regulatory subunit RPN11 OS=Triticum aestivum OX=4565 GN=TRAES_3BF102700120CFD_c1 PE=2 SV=1	1.7943	1.023279e-08	MERLQRIFGAGGMGQPPSDSPLLDSSEQVYISSLALLKMLKHGRAGVPMEVMGLMLGEFVDDYTVRVVDVFAMPQSGTGVSVEAVDHVFQTNMLDMLKQTGRPEMVVGWYHSHPGFGCWLSGVDINTQQSFEALNPRAVAVVIDPIQSVKGKVVIDAFRLINPQTMMLGQEPRQTTSNVGHLNKPSIQALIHGLNRHYYSIAINYRKNELEEKMLLNLHKKKWTDGLILKKFDAHSETNEQTVQEMLSLAIKYNKAVQEEDELSPEKLAIANVGRQDAKKHLEEHVSNLMSSNIVQTLGTMLDTVVF
tr|A0A3B6PEF0|A0A3B6PEF0_WHEAT	TraesCS6B02G012500	Uncharacterized protein OS=Triticum aestivum OX=4565 PE=4 SV=1	1.56214	6.599988e-07	MQIFVKTPTDRTITLDVESSNTIDNVKAKIHEKEGIPPYQQCLIFIGKHLEDNRTLADYDIKKEFTIYLFPRLEGGMGISVETLYGKVITLQVDPSDTIQAIMAKINDEYGIHPAQQRLIFNKQKLECRYPLMYYDIQNGSTLDLVVCQRPKLMQIFVRNLSGKTLVFQVRSSDTVYSVKEKIHQVEGIDPNEQRLTYGIQLEDDLTLADQDIEEHCTLHLNLRLLSCINCTTNNHSTARKMCHK
tr|A0A3B6PK14|A0A3B6PK14_WHEAT	TraesCS6B02G198600	EF-hand domain-containing protein OS=Triticum aestivum OX=4565 PE=4 SV=1	2.44749	6.643163e-09	MEVAPDLSAVSALALQVDLLQLPPEIPAPGAPALRGVLDHLFAHWLSLPDTVALVSCLAQKAKANGAGFAGGAMLPSMMMQGGANVPPLSPRSPRLSRKPSGVGGHSNRCASPLRPATARAVKEVIPQFYFRDGRPLPYEQKRQCISIVEQLFAGHSNGLRIQEFRMVTRELCKLPSFFTTVLFGKIDKDNTEFVSRDAFMDFWVNSNMMTMDSATQVFTILKQPDHDYLTKEDFKPVLRDLLDNHPGLEFLKSTPEFQERYAETVVYRIFYCLNRIGNGLLSLRELKRGNLLDSLRHADDEEDINKVLRIVDRIFSEVPRKFTSKIPGKMCYEDFVHFILSEEDKSSEPSQDYWFKCIDLDGNGILTHIELQYFFEEQLHRMECMAQEPVLFEDILCQ…
tr|E2F4X3|E2F4X3_WHEAT	TraesCS1D02G285300	30S ribosomal protein S8, chloroplastic OS=Triticum aestivum OX=4565 PE=3 SV=1	1.63369	9.458751e-05	MVRVSVLNDALKSMYNAEKRGKRQVMIRPSSKVIIKFLIVTQKHGYIGEFEYVDDHRSGKIVVELNGRLNKCGVISPRFDVGVKEIEGWTARLLPSRQFGYIVLTTSAGIMDHEEARRKNVGGKVLGFFY
tr|W5FWF5|W5FWF5_WHEAT	TraesCS5A02G170200	Uncharacterized protein OS=Triticum aestivum OX=4565 PE=3 SV=1	1.81067	7.515697e-06	MATVPAPAAETAASTARTVKDVNPHEFVKAYSAHLKRSGKMELPEWVDIVKTARFKELPPSDADWYYIRAASMARKIYLRQGIGIGGFQKIYGGRQRNGSRPPHFCKSSGAVSRNILQELQKMGIIDVDPKGGRLITSQGRRDLDQVAGTVPAEF
tr|A0A1D6CXF2|A0A1D6CXF2_WHEAT	TraesCS7B02G170000	Proteasome subunit alpha type OS=Triticum aestivum OX=4565 PE=3 SV=1	1.51213	1.685294e-05	MARYDRAITVFSPDGHLFQVEYALEAVRKGNAAVGVRGVDTVVLGVEKKSTPKLQDSRSVRKIASLDTHIALACAGLKADARVLINRARVECQSHRLTVEDPVTVEYITRYIAGLQQKYTQSGGVRPFGLSTLIVGFDPYTEKPALYQTDPSGTFSAWKANATGRNSNSMREFLEKNYKETSGKETIKLTIRALLEVVESGGKNIEIAVMTHKDGLRQLEEEEIDEYVAEIEAEKAAAEAAKKGGPKDT
tr|A0A3B6RPJ9|A0A3B6RPJ9_WHEAT	TraesCS7A02G434500	Histone H4 OS=Triticum aestivum OX=4565 PE=3 SV=1	1.91869	2.266539e-05	MSSRGKGGKGLGKGGAKRHRKVLRDNIQGITKPAIRRLARRGGVKRISGLIYEETRGVLKIFLENVIRDAVTYTEHARCKTVTAMDVVYALKRQGRTLYGFDG
tr|C0KEI1|C0KEI1_WHEAT	TraesCS1B02G041928	Omega-gliadin (Fragment) OS=Triticum aestivum OX=4565 PE=4 SV=1	1.9934	1.729217e-05	ARELNPSEQELQSPQQPVPKEQSYPQQPYPSHQPFPTPQQYSPYQPQQPFPQPQQPTPIQPQQPFPQQPQQPQQPFSQPQQQLPLQPQQPFPQPQQPIPQQPQQSFPQQPFPQPLQRPEQQFPQQPQQIIPQQTQQPFPLQPRQPFPQQPQRPFAQQPEQIISQQPFPLQPQQPFSQPQQPFPQQPEQIIPQQPQQPSPLQPQQPFSQQPQRPQQPFPQQPQQIIPQQPQQPFPLQPQQPVPQQPQRPFGQQPEQIISQRPQQPFPLQPQQPFSRPQQPFPQQPGQIIPQQPQQPFPLQPQQPFPQQPPQQPEQIISEQPQQPFPLQPQQPSPQQPPHQQLPFPQPPQPFVVVE
tr|A0A7D5RE50|A0A7D5RE50_WHEAT	TraesCS6D02G000200	Monomeric alpha-amylase inhibitor OS=Triticum aestivum OX=4565 GN=MAI PE=3 SV=1	1.54272	0.00559689	MWMKTGFWGLLVFMLVATTMAVEYGARSHNSGPWSWCDPATGYKVSALTGCRAMVKLQCVGSQVPEAVLRDCCQQLADINNEWCRCGDLSSMLRSVYQELGVREGKEVLPGCRKEVMKLTAASVPEVCKVPIPNPSGDRAGVCYWAAYPDV
tr|A0A3B6RNL6|A0A3B6RNL6_WHEAT	TraesCS7A02G403300	TBCC domain-containing protein 1 OS=Triticum aestivum OX=4565 PE=3 SV=1	1.53995	6.293453e-06	MPSQADEEAHQLSYLQKHMANVLTLLADSVDGEGDESMVLTMETFEHLGFLLQFSEGTPLSQAAPFFANSDLDMPAAPVPATQVHDWILQNIASSLEYTAEKAITKENNQRSVSDPDVAMADAVTNTRIQSSSSTGASVQNNPGYYRNTSFVEGISKTSVVKHGSDIKGHSIKVLNCHDSVIYILAPLKYATVYGCSDTTVVLGAIGKVVKVEHCERVQIVAASKRIFIANCRECIFYLGVNHQPLIVGDNHKLQVAPFNTYYPQLGEHLAQVGVDPNVNKWDQPFVLGVVDPHDSLSHPAGVSDVQAESATCLDPDLFTDFMIPSWFEAEGPTKYNPFTLPEVYWASQRKKNASLEDIQKNIRELELDDNRKKELACALHAQFKDWLYAFDLTPSLF
tr|A0A2X0S6V5|A0A2X0S6V5_WHEAT	TraesCS2B02G329100	Genome assembly, chromosome: II OS=Triticum aestivum OX=4565 GN=CAMPLR22A2D_LOCUS3122 PE=3 SV=1	1.79413	6.982201e-05	MESSYLPATTESIAMAQEAKDASESISILYRVIQDPSSSADALRTKELAITNLTNYLTEESRAEELRNLLTQLRPFFSLIPKAKTAKIVRGIIDAVSKIPGTSDLQISLCKEMVEWTRAEKRTFLRQRVEARLAALLLENQEYTEALTLLTGLIKEVRRLDDKLLLVDIDLLESKLHFSLRNLPKAKASLTAARTAANAIYVPPAQQGTIDLQSGILHAEEKDYKTAYSYFFEAFEAFNALDDPRAIFSLKYMLLCKIMVNQADDVAGIISSKASLKYVGPDVDAMKAVADAYSKRSLKYFETALRDFKAQLEEDPIVHRHLSSLYDTLLEQNLCRLIEPYSRVEIGHVAQMIELAVDDVEKKLSQMILDKKFAGTLDQGAGCLIIFEDQKTEAIFPAT…
tr|W5AVS5|W5AVS5_WHEAT	TraesCS2A02G495800	MPN domain-containing protein OS=Triticum aestivum OX=4565 PE=3 SV=1	1.86507	1.050426e-08	MDVVKAAQLSGRTLEKVVVHPLVLLSIVDHYNRVARDTRKRVVGVLLGTSSRGVVDVTNSYAVPFEEDDKDPRIWFLDHNYHESMFSMFKRINAKEHVVGWYSTGPKLKENDLDVHALFTNYVPNPVLVIIDVQPKELGIPTKAYYAVEEVKENATQKSQKVFVHVPSEIAAHEVEEIGVEHLLRDVKDTTISTLATEVSSKLAALKGLDARLTEIRGYLDLVIEGKLPLNHEILYHLQDVFNLLPNLNVNELIKAFAVKTNDMMLVIYLSSLIRSVIALHNLINNKMLNKEHEKAEDLKPAAVPTAAGS
tr|A0A3B6BY18|A0A3B6BY18_WHEAT	TraesCS2B02G053100	Eukaryotic translation initiation factor 3 subunit M OS=Triticum aestivum OX=4565 PE=3 SV=1	1.6862	1.12054e-07	MATIVNTTEEEPTLAVVRSTAQLAWADAGAEVADPEVARLCAEAQQHALAGRWLDMASLMLANADLLLLAPTAPDKDLECVLTVICNLVTKAGSEDEALEIARLICAKLAHQPGDKPTLRIKVLFSLYNLLPSLSGKALVYRKALELAAAGKAADCVVPTFKNIDAFVAYWGIGKPEQRDLFLAVTRILKDHKGMTKEYFKFLNKYLATFDGSADDADAIGAAKEEAAAAIIEFVKSSDLYQCDLLDMPAVAQLEKDEKYQPVYELLKIFLTQRLDSYLAFQTANSSLLQGYGLVHEECITKMRLMSLLDLSGHCSGEIPYSAITKALEINDDEVEYWIVKAISSKILDCKVDQLNQLVIVRYFMSTRLSWSMLQCYAFLFG
tr|A0A1D6BRH1|A0A1D6BRH1_WHEAT	TraesCS7A02G545400	Uncharacterized protein OS=Triticum aestivum OX=4565 PE=3 SV=1	1.57623	7.83222e-10	MAVDLTPRQPAKAYGGEGGAYYEWSPAELPMLGVASIGAAKLSLAAGGMSLPSYSDSAKVAYVLQGKGTCGIVLPEATKEKVVAVKEGDAMALPFGVVTWWHNTPGSATELVILFLGDTSKGHRPGQFTNFQLTGASGIFTGFSTEFVGRAWDLKQNDAAKLVSSQPASGIVKLSAGQKLPEPVAEDRKDMALNCLEAKLDVDIPKGGRVVVLNTANLPLVKEVGLGADLVRIDAHSMCSPGFSCDSAYQVTYIVRGSGRVQVVGPDGKRVLETRIEGGSLFIVPRFHVVSKIADASGMEWFSIITTPNPIFSHLAGKTSVWKAISPEVLEASFNTTPEMEKLFRSKRLDSEIFFAPN
tr|D0EVP3|D0EVP3_WHEAT	TraesCS1D02G007400	LMW-m glutenin subunit OS=Triticum aestivum OX=4565 PE=4 SV=1	1.66658	6.099051e-06	MKTFLVFALLAVVATSAIAQMETSCIPGLERPWQQQPLQQKETFPQQPPSSQQQQPFPQQPPFLQQQPSFSQQPLFSQKQQPVLPQQPAFSQQQQTVLPQQPAFSQQQHQQLLQQQIPIVYPSILQQLNPCKVFLQQQCSPVAMPQHLARSQMWQRSSCNVMQQQCCQQLPRIPEQSRYEAIRAIIFSIILQEQQQGFVQPQQQQPQQSVQGAYQPQQQSQQQLGQCSFQQPQQQLGQQPQQQQVQKGTFLQPHQIARLEVMTSIALRTLPTMCSVNVPLYSSITSAPLGVGSRVGAY
tr|A0A341P2T8|A0A341P2T8_WHEAT	TraesCS1A02G228700	Histone H2B OS=Triticum aestivum OX=4565 PE=3 SV=1	1.58961	0.00802816	MAPKAEKKPAAKKPAEEEPTTEKAEKAPAAKKPKAEKRLPAGKTASKEGGEKRGRKKGKKSVETYKIYIFKVLKQVHPDIGISSKAMSIMNSFINDIFEKLAGEAAKLARYNKKPTITSREIQTSVRLVLPGELAKHAVSEGTKAVTKFTSS
tr|A0A3B6LW24|A0A3B6LW24_WHEAT	TraesCS5B02G477400	Histone H2A OS=Triticum aestivum OX=4565 PE=3 SV=1	2.8301	7.13598e-07	MGAPVYLASVLEYLAAELLELAGNAAKDNKKSRIIPRHLLLAIRNDQELGKLLAGVTIAHGGVLPNINPVLLTKKTAEKEPKSPKKTAEKEPKSPKKTAEKEPKSPKKA
tr|A0A3B6APJ1|A0A3B6APJ1_WHEAT	TraesCS2A02G017400	Uncharacterized protein OS=Triticum aestivum OX=4565 PE=3 SV=1	1.54612	3.904303e-05	MADNSKEKLGSGAAHTINLETFSRRLNVFYDHWNENKSDLWASSDAIAIATPPPSEDLRHLKSTALDVWFLGYDEFPETIIVFMQKQIHFLCSCFGSDIVLHVKSKNGDGIDLMDDNTAKVICWICVQLADVTHGFPEIFAVEGATKIICVKKTACLTSSLMKNFVVPTMEKVIDEERKVSHLSLMYDTEKVIIDPLKAKENGGKFDLRPGASSNDDYLYYDPASIIICATGSRYSNYCSNVARTFLTLLKAQEASLAACKPGNQMSAVFKAAVAVFDDKTAEILTNCSKAVKDVAYSFNDEEENVNDVPYSRELVIQVDQRNEGVLLPIYGSMIPFHVSTVKTTSNSERREYLACHSQMFDKAQGAIYLKMITLRSKDPRHSSEVVQQIKTLRRQVAS…
tr|Q8L804|Q8L804_WHEAT	TraesCS7B02G198400	Putative 40S ribosomal protein S3 OS=Triticum aestivum OX=4565 PE=1 SV=1	1.56613	0.00011519	MATQISKKKKFVSDGVFYAELNEMLTRELAEDGYSGVEVRVTPMRTEIIIRATRTQNVLGEKGRRIRELTSVVQKRFNFLENGVELYAEKVVNRGLCAIAQAESLRYKLLGGLAVRRACYGVLRFVMESGAKGCEVIVSGKLRAQRAKSMKFKDGYMISSGQPVNEYIDAAVRHVLLRQGVLGIKVKIMLDWDPKGKLGPTTPLPDLVTIHPPKEENELRPPALVEV
tr|A0A3B5ZS22|A0A3B5ZS22_WHEAT	TraesCS1B02G168600	Cyanate hydratase OS=Triticum aestivum OX=4565 GN=CYN PE=3 SV=1	1.70883	1.884637e-07	MEESGASAAAVVPRLLAAKEESGKSFSDIAAETGLTNVYVAQLLRRQAQLKPDMAPAFRAAVPALTDELVELMMRPPFRSYHPDIVHEPAIYRLNEAVMHFGESIKEIINEDFGDGIMSAIDFYCSVDKIQGADGKDRVVVTFDGKYLPYTEQRSEHMMSRLNRNAS
tr|A0A3B6LVN2|A0A3B6LVN2_WHEAT	TraesCS5B02G468500	S5 DRBM domain-containing protein OS=Triticum aestivum OX=4565 PE=3 SV=1	2.26761	4.650374e-05	MADRGGERGVDRGGFGRGFGRGGRGDRGGRRGGRRGPRQEEEKWVPVTKLGRLVKEGRFTKMEEIYLHSLPVKEHQIVETLCPGLKDEVMKITPVQKQTRAGQRTRFKAFVVVGDSNGHVGLGVKCAKEVATAIRGAIILAKLSIVPVRRGYWGNKIGLPHTVPCKVTGKCGSVTVRMVPAPRGSGIVAARVPKKVLQFAGIDDVFTSSRGSTKTLGNFVKATFDCLMKTYGFLTPDFWRETTFTKAPYQEFTDILAKPTKALMLDAPAEKVEA
tr|A0A3B6C6H6|A0A3B6C6H6_WHEAT	TraesCS2B02G296700	Eukaryotic translation initiation factor 3 subunit H OS=Triticum aestivum OX=4565 PE=3 SV=1	1.60256	1.529457e-06	MANPLAAGGKSFLQAMSTVTEEAAVPLRVVQMEGLAVLKIIKRCEEFAPALVTGQLLGLDVGSVLEVTNCFPFPIREDDEEADADGANYQLEMMRCLREVNVDNNTVGWYQSCLLGSFQTVELIETFMNYQENIRRCVCIVYDPSRSSQGVLALKALKLTDSFMDLYRNNGLTGEKEKKLSWVDIFEEIPIKVSNSALVSAFMKELEPESPVSQCDFDRLKLSTAPFMERNLEFMIGCMDGLSSEQNKFQYYYRNLGRQQSQQQAWLQKRRQENMSRKAAGEEPLPEEDPSNPIFKPLPEPSRLEGYLVTNQISSYCNHINGVAGQSFNRLYLMKALQED
tr|A0A3B6HWQ2|A0A3B6HWQ2_WHEAT	TraesCS4A02G178700	SOR_SNZ domain-containing protein OS=Triticum aestivum OX=4565 PE=3 SV=1	2.40021	5.211266e-06	MASDGVVALYGNNKAVVEPSAKPAAATFSVKVGLAQMLRGGVIMDVVTAEQARLAEEAGACAVMALERVPADIRAQGGVARMSDPALIRDIKRAVTIPVMAKARIGHFVEAQILEAIGVDYVDESEVLTLADDAHHINKHNFRVPFVCGCRDLGEALRRIREGAAMIHTKGEAGTGNVVEAVRHVRSVMGAVRALRNMDEDEVFSYAKQIAAPYDLVMQTKQLGRLPVVQFAAGGVATPADAALMMQLGCDGVFVGSGIFKSGDPARRARAIVQAVTHYSDPEILANVSAGLGEAMVGINLSDPNVERFAARSQ
tr|A0A060AER5|A0A060AER5_WHEAT	TraesCS1B02G329992	High-molecular-weigh glutenin subunit 1By15 OS=Triticum aestivum OX=4565 GN=HMW-GS 1By15* PE=3 SV=1	1.67676	0.000300355	MAKRLVLFATVVITLVALTAAEGEASRQLQCERELQESSLEACRQVVDQQLAGRLPWSTGLQMRCCQQLRDVSAKCRPVAVSQVVRQYEQTVVPPKGGSFYQGETTPLQQLQQVIFWGTSSQTGQGYYPSISSPQQGPYYPGQASPQQPGQGQQPGKWQELGQGQQEYYPTSLHQSGQGQQGYYPSSLQQPGQGQQTGQVQQEYYPTSLQQSGQGQQIGQGQQGYYPTSPQHPGQRQQPGQGQQIGQGQQPGQGRQIGQGQQSGQGQQGYYPTSPQQLGQGQQPGQWQQSGQGQQGYYPTSQQQSGQGQQGQYPASQQQPGQGQQGQYPASQQQAAQGQQGQYPASQQQPGQGQQGQYPASQQQPGQGQQGHYPASQQQPGQGQQRHYPASLQQPGQGQ…
tr|A0A3B6RS92|A0A3B6RS92_WHEAT	TraesCS7A02G529900	HATPase_c domain-containing protein OS=Triticum aestivum OX=4565 PE=3 SV=1	1.63913	4.388197e-06	MRKWALSCALLLVLLLTTLPDPAKKLQVNAEESSDEVGDFPKVEEKLGAVPHGLSTDSEVVQRESESISRKTLRNSAEKFEFQAEVSRLMDIIINSLYSNKDIFLRELISNASDALDKIRFLTLTDKEALGEGDTAKLEIQIKLDKENKILSIRDRGVGMTKEDLIKNLGTIAKSGTSAFVEKMQTGGDLNLIGQFGVGFYSVYLVADYVEVVSKHNDDKQYVWESKADGSFAISEDTWNEPLGRGTEIKLHLRDEAKEYLEEGKLKDLVKKYSEFINFPIYLWATKEVDVEVPADEEESSEEEESTTERTEEEETEDDEEKKPKTKTVKETTTEWELLNDMKAVWLRSPKEVTEEEYAKFYHSLAKDFGDDKPMTWSHFSAEGDVEFKALLFVPPKAP…
tr|A0A077RVM7|A0A077RVM7_WHEAT	TraesCS3B02G065200	Uncharacterized protein OS=Triticum aestivum OX=4565 GN=TRAES_3BF098300020CFD_c1 PE=3 SV=1	1.60889	0.00240704	MYSNFKEQAIEYVKQAVQEDNAGNYVKAFPLYMNALEYFKTHLKYEKNPKIKEAITAKFTEYLRRAEEIRAVLDEGGGGPPGAPNTKGKDGGGDGAGGDDSDQSKLRAGLNSAIITEKPNIKWNDVAGLESAKQALQEAVILPVKFPQFFTGKRRPWRAFLLYGPPGTGKSYLAKAVATEADSTFFSISSSDLVSKWMGESEKLVANLFQMARENAPSIIFIDEIDSLCGTRGEGNESEASRRIKTELLVQMQGVGHNDDKVLVLAATNTPYALDQAVRRRFDKRIYIPLPDAKARQHMFKVHLGDTPHSLSESDFEVLGRRTEGFSGSDVAVCVKDVLFEPVRKTQDAMYFFKIDGDMWMPCGPKQPGAVQTTMQDLASKGLASQILPPPISKNDFEK…
tr|W5EWD3|W5EWD3_WHEAT	TraesCS5B02G226600	Uncharacterized protein OS=Triticum aestivum OX=4565 PE=3 SV=1	1.64213	0.000136704	MVQRLTYRKRHSYATKSNQTRVVKTPGGKLVYQYTKKRASGPKCPVTGKKIQGIPHLRPTEYKRSRLSRNRRTVNRPYGGVLSGTAVRERIIRAFLVEEQKIVKKVLKIQKTKDKTTSK
tr|A0A3B5Y4G7|A0A3B5Y4G7_WHEAT	TraesCS1A02G344000	ATP-dependent 6-phosphofructokinase OS=Triticum aestivum OX=4565 GN=PFK PE=3 SV=1	1.67032	1.847768e-08	MASHIILPPDGDDDEQQRREDEENDGGGSGSGGDGEQQQQGGGNAKAALPFSAMCVRISRDSYPNLRALRNASHASLTDAAYVKISEGDFGYVLDDVPHLADYIPDVPTYPNPLQDHPAYSTVKQYFVNEDDTVPQKVVVQKNSRRGVHFRRAGPRQRVNFESDEVKACIVSCGGLCPGLNTVIRELVCGLAHMYNVNNIFGIQNGYKGFYSSNYVAITPKTVNDIHKRGGTVLGTSRGGHDTKKIVDNIQDRGINQVYIIGGDGTQKGAYEIYKEIRKRGLKVAVAGVPKTIDNDIAIIDKSFGFDSAVEEAQRAINSAHVEACSAENGIGLVKLMGRYSGFIAMYATLASRDVDCCLIPESPFYMDGEGGLLQYVERRLKENKHMVIVVAEGAGQDI…
tr|A0A3B6GKR5|A0A3B6GKR5_WHEAT	TraesCS3D02G013000	Sucrose-phosphate synthase OS=Triticum aestivum OX=4565 PE=3 SV=1	9.57955	4.650394e-13	MVGNDWINSYLEAILDAGGAAGEISAASAAPGGSAAEKRRDKSSLMLRERGRFNPARYFVEEVISGFDETDLYKTWVRTSAMRSPQERNTRLENMSWRIWNLARKKKQIEGEEASRSSKKRLEREKARRDAAADLSEDLSDGEKGEHINESSIHAESTRGHMPRIGSTDAIDVWANQHKDKKLYIVLISIHGLIRGENMELGRDSDTGGQVKYVVELARALGETPGVYRVDLLTRQISAPDVDWSYGEPTEMLSPRNSENLGDDMGESSGAYIVRIPFGPREKYIPKEQLWPHIQEFVDGALVHIMQMSKVLGEQVGNGQPVWPVVIHGHYADAGDSAALLSGALNVPMVFTGHSLGRDKLEQLLKQGRQTRDEIDATYKIMRRIEAEELCLDASEIVI…
tr|A0A3B5Z5P9|A0A3B5Z5P9_WHEAT	TraesCS1B02G473400	DNA damage-binding protein 1 OS=Triticum aestivum OX=4565 PE=3 SV=1	1.66695	2.64653e-10	MSTWNYVVTAHKPTSVSHSCVGNFTGPHQLNLIVAKCTRIEIHLLTPQGLQPMLDVPIYGRIATIELFRPHNEAQDFLFVATERYKFCVLQWDAEKSELLTRSMGDVSDRIGRPTDNGQIGIIDPDCRLIGLHLYDGLFKVIPFDNKGQLKEAFNIRLEELQVLDIKFLYGCLRPTIVVLYQDNKDARHVKTYEVALKEKDFVEGPWSQNNLDNGAGLLIPVPAPLGGVIIIGEETIVYCNANSTFKAIPIKQSITRAYGRVDPDGSRYLLGDNSGILHLLVLTQERERVTGLKIENLGETSVASSISYLDNGVVYVGSRFGDSQLVKLNLQPDATGSFVEILERYVNLGPIVDFCVVDLDRQGQGQVVTCSGAFKDGSIRVVRNGIGINEQASVELQG…
tr|W5FPA7|W5FPA7_WHEAT	TraesCS5A02G104000	30S ribosomal protein S4, chloroplastic OS=Triticum aestivum OX=4565 PE=3 SV=1	1.79093	0.000180781	MVHVNFYRNYGKTFKKPRRPYEKERLDAELKLVGEYGLRCKRELWRVQYALSRIRNAARHLLTLDEKNPRRIFEGAALLRRMNRYGLLAEGQDKLDYVLALTAENFLARRLQTLVFKAGMAKSIHHARVLIRQRHIRVGRQIVNVPSFMVRVESEKHIDFSLTSPFGGGPAGRVKRKNQKKASGGGDAGGDEEEE
tr|W5FSM8|W5FSM8_WHEAT	TraesCS5B02G167100	Uncharacterized protein OS=Triticum aestivum OX=4565 PE=3 SV=1	1.94616	5.849198e-07	MVKYSTDPANPTKSAKAMGRDLRVHFKNTRETAFALRKMSLNKAKRYLEDVLAHKQAIPFRRYCRGVGRTAQVKNRQPNGQGRWPAKSAKFVLDLLKNAESNAEVKGLDVDALYISHIQVNQAQKQRRRTYRAHGRINPYMSNPCHIELILSEKEEPVKKEAESQIARKA
tr|A0A077RW85|A0A077RW85_WHEAT	TraesCS3B02G365900	Uncharacterized protein OS=Triticum aestivum OX=4565 GN=TRAES_3BF027700130CFD_c1 PE=4 SV=1	1.69189	1.208723e-09	MADQLSEEQIGEFKEAFSLFDKDGDGSITTKELGTVMRSLGQNPTEAELQDMINEVDADGNGTIDFPEFLNLMARKMKDTDSEEELKEAFRVFDKDQNGFISAAELRQVMTNLGEKLSEEVEEMVREADVDGDGQINYDEFVKVMMAK
tr|A0A3B6JRQ6|A0A3B6JRQ6_WHEAT	TraesCS4D02G349100	PCI domain-containing protein OS=Triticum aestivum OX=4565 PE=3 SV=1	1.53088	5.160906e-05	MSSAMESSYLPATTESIEKAQEAKDASESISILYRVIQDPSSSADALRTKELAITNLTNSLTKENRAEDLRNLLTQLRPFFSLIPKAKTAKIVRGIIDAVAKIPGTSDLQISLCKEMVEWTRAEKRTFLRQRVEARLAALLLENQEYTEALTLLTGLIKEVRRLDDKLLLVDIDLLESKLHFSLRNLPKAKASLTAARTAANAIYVPPAQQGTIDLQSGILHAEEKDYKTAYSYFFEAFEAFNALDDPRAIFSLKYMLLCKIMVNQADNVAGIISSKASLKYVGPDVDAMKAVADAYSKRSLKYFETALRDFKAQLEEDPIVHRHLSSLYDTLLEQNLCRLIEPYSRVEIEHVAQMIELPVDHVEKKLSQMILDKKFAGTLDQGAGCLIIFEEQKTEAI…
tr|A0A3B6SF99|A0A3B6SF99_WHEAT	TraesCS7B02G136800	COP9 signalosome complex subunit 6 OS=Triticum aestivum OX=4565 PE=3 SV=1	1.73365	1.816538e-08	MSTPSDPAASAQPPSTAATSSSGLTFKLHPLVIVNVSDHYTRVKAQASFTAEAPSPGKAQASCSAEGSSAPAEPPRVFGCVIGVQRGRTVEIFNSFELVLDPVTGTLERAFLEKKLELYKKVFPEFYVLGWYSTGSDVQDTDILIHKALMDINESPVYLLLNPAINHSQKDLPVTIYESELHVIDGGPQLIFVKSNYTIETVEAERISVDHVAHLKPSDGGSAATQLAAHLTGIHSAIKMLNSRVRVIQQYLGAMQKGDFLTEYNDTLLMTYLAMFTNCSSTMNELVEKFNTTYERSPARRGGRGAFM
tr|A0A3B6QCZ0|A0A3B6QCZ0_WHEAT	TraesCS6D02G153600	Uncharacterized protein OS=Triticum aestivum OX=4565 PE=3 SV=1	1.54646	5.021289e-05	MLCYFHDVVLTNSATGMEQNGESHLKEPLLHAADGASAAAARVSPRKERTTRKVMFNVRGMSCGSCAVSIETVVAGLKGVESIQVSTLQGQAVVQYSPEETDARTIKEAIEDINFEVDELQEQEIAVCRLRIKGMACTSCSESIERALLMVPGVKKAAVGLALEEAKVHFDPNITSRDLLIEAIEDAGFGADLISYGDDVNKMHLKLEGVSSPEDTKLIQSVLETVEGVNNVEWDTSGQTVTVAYDPYVTGPRLLIQRIQDAAEPPKCFNASLYSPPKQREVERHHEIMSYRNQFLWSCLFSVPVFLFAMVLPMLPPSGDWLFYKIYNNMTVGMLLRWLLCSPVQFIIGWRFYVGAYHALKRGYSNMDVLVALGTNAAYFYSVYIIVKALTSDTFEGQD…
tr|A0A3B6H2M0|A0A3B6H2M0_WHEAT	TraesCS3D02G517900	Uncharacterized protein OS=Triticum aestivum OX=4565 PE=3 SV=1	2.28771	4.641552e-05	MPKQIHEIKDFLLTARRKDARSVRIKRTKDAVKFKVRCSRYLYTLCVHDTDKANKLKQSLPPLNVQEV
tr|A0A3B6C0D4|A0A3B6C0D4_WHEAT	TraesCS2B02G129300	Uncharacterized protein OS=Triticum aestivum OX=4565 PE=3 SV=1	1.7634	3.891955e-05	MARGTAATAAAAAKGKKKGSVSFVIDCTKPVEDKIMEIASLEKFLQERIKVAGGKAGNLGDSVTVTRDKSKVTVTSDGAFSKRYLKYLTKKYLKKHNVRDWLRVIAANKERNVYELRYFNIAENEGEEED
tr|A0A3B6PIA4|A0A3B6PIA4_WHEAT	TraesCS6B02G137700	Protein arginine N-methyltransferase OS=Triticum aestivum OX=4565 PE=3 SV=1	1.67316	1.444462e-07	MPLGQRAGDKSDSRYCGVEVLDFPAGDGLPAVLTHSLSSAFDFLLAPLVDPEYRPTPGAVLPVAASDLVLSPSQWSSHIVGKISEWIDLDSEDEQLRLDSELTLKQEIAWATHLSLQACVIPPPKRSTCANYARVVNNILQGLTNMQLWLRIPLEKSESMDEDRGKSETVDSWEWWNSFRLLCEHSSQLYVALDILSSLPSMNSLGRWFGEPVRAAILQTDAFLTNARGYPCLSKRHQTLLTGFFNHSVQVIISGRSNHNVSQVSEGVLSGDENHTEDTPTRHALSPYLEYMAYLYQRMDPLPEQERFEINYRDFLQSPLQPLMDNLEAQTYETFEKDTVKYTQYQRAIAKALVDKVSEDEVSTTRTVLMVVGAGRGPLVRASLQAAEETGRKLKVYAV…
tr|A0A3B5ZUA2|A0A3B5ZUA2_WHEAT	TraesCS1D02G161300	Katanin p80 WD40 repeat-containing subunit B1 homolog OS=Triticum aestivum OX=4565 PE=3 SV=1	1.60679	8.781343e-07	MHLQLQVSVTTLLQSLSGHTSPVESLSFDSSEVMIGAGAATGTIKIWDIKEAKVVRTFTGHRSNCASLDSHPFGEFFASGSSDTNMKIWDMRKKRCIHTYQGHTGRIDVLRFTPDGRWIVSGGADSSVKIWDLTAGKLLHDFRLHEGPINCLDFHPHEFLLATGSADKTVKFWDLETFELIGSSGPENYREYYMPASVVRSMTFNSDGKALFCGLHENLKVLSWEPIICHDAVDVGWSTLADLNVQEGKLLGCSYNQSCVGIWVVDLMKFDPYTVGSAEAFWNGTGNGPLQADNSISSMLGSLSISRRPEANETPSSTLLKRPMSMSKETSVPVSSAVRKRLSKAPGINNLRLTRAESAPLLSPRVRLKPNSTDHQKRHIANVRFKVDLSTSARMIAGN…
tr|A0A3B6DN79|A0A3B6DN79_WHEAT	TraesCS2D02G592100	Uncharacterized protein OS=Triticum aestivum OX=4565 PE=4 SV=1	1.53169	3.01913e-06	MDLSRFASPRPPGLQIGAASLRGACSLRRPRHRGGVHGGRGGNLMVASALRGSSSGLFYAAPNHGRLRLRRTGSARCQGNDSLAYVDGPLEGTKGSSDGGDDPGTTSGSDAEERARSAAVDVDDLRDLLQKARKELEVARLNSTMFEGKAQRISESAIALKDRADSAQTEVSAAVATVQEIISKEDDAKEAVRKATMALSMAEARLQLAAEALDAKRGSVGQLEVSLDDVEEEALASAQEEIKGCQASLSKCEEELGQIQGKKMELQKEVDRLTELAERALLDASKAEEDVSNIMVLAEQAVALEMEAAKRVNDAELALQKAEKAVESVVELVPAADGHMSDEEDDLSDVYDYSGDGMADISERDEVSNVERLMQISDLAAEGIEPLEPSNEMPVEERS…
tr|A0A3B6SLX4|A0A3B6SLX4_WHEAT	TraesCS7B02G355000	Uncharacterized protein OS=Triticum aestivum OX=4565 PE=3 SV=1	1.63484	4.283793e-05	MQNEVGDMADLYVPRKCSTTNRIITAKDHASVQIIIGHVDENGLYGGRFTTFALSGFVRAQVIIFLVY
tr|A0A0X9ARV2|A0A0X9ARV2_WHEAT	TraesCS1A02G317311	High molecular weight glutenin subunit OS=Triticum aestivum OX=4565 GN=Glu-Ax PE=3 SV=1	1.81858	0.000187514	MTKRLVLFAAVVVALVALTAAEGEVSGQLQCERELQEHSLKACRQVVDQQLRDVSPECQPVGGGPVARQYEQQVVVPPKGGSFYPGETTPPQQLQQSILWGIPALLRRYYLSVTSPQQVSYYPGQASSQRPGQGQQPGQGQQEYYLTPPQQSGQWQQPGQGQSGYYPTSPQQSGQEQPGYYPTSPWQPEQLQQPTQGQQRQQPGQGQQLRQGQQGQQSGQGQPRYYPTSSQQPGQLQQLAQGQQGQQPERGQQGQQSGQGQRLGQGQQGQQPGQKQQSGQGQQGYYPISPQQLGQGQQSGQGQLGYYPTSPQQSGQGQSGYYPTSAQQPGQLQQSTQEQQLGQEQQDQQPGQGRQGQQSGQRQQDQQSGQGQQPGQRQPGYYSTSPQQLGQGQPRYYPT…
tr|A0A3B6QHV5|A0A3B6QHV5_WHEAT	TraesCS6D02G203300	GrpE protein homolog OS=Triticum aestivum OX=4565 PE=3 SV=1	2.1456	1.567368e-08	MAALLRTAAALAPRPSPARESPRRPCAASLACSRRPPVRSLRAQLLTTRRAPGHVASRLRRLGATEADESAQTATQEDTETEVTGDTLADDASAGTEETLSVLITALQSYKEALMNNDEAKVAEIESFLLSIEDEKNSLMSKITALDAELTTERDRILRIGADFDNYRKRTEREKLSLMTNVQGEVVESLLPVLDNFERAKTQIKVETEREAKINDSYQSIYKQLVEILNSLGVEDVETVGKPFDPMLHEAIMREESVEYEDGVVLQEFRKGFKLGERLLRPAMVKVSAGPGPEKSGDDDTTIGEDSVGPQAFDDGEDDGFDDADAE
tr|W5B985|W5B985_WHEAT	TraesCS2A02G364000	Proliferating cell nuclear antigen OS=Triticum aestivum OX=4565 GN=CAMPLR22A2D_LOCUS3649 PE=3 SV=1	1.79598	1.742616e-11	MLELRLVQGSLLKKVLEAIKELVTDANFDCSGTGFSLQAMDSSHVALVALLLRSEGFEHYRCDRNLSMGMNLGNMAKMLRCAGNDDIITIKADDGSDTVTFMFESPNQDKIADFEMKLMDIDSEHLGIPDSEYQAIVRMPSSEFSRICKDLSSIGDTVIISVTKEGVKFSTAGDIGTANIVCRQNKTVDKPEESTIIEMQEPVSLTFALRYMNSFTKASPLSDQVTISLSSELPVVVEYKIGEMGYIRFYLAPKIEEDEEMKA
tr|A0A3B6QG76|A0A3B6QG76_WHEAT	TraesCS6D02G162700	Glycosyltransferase OS=Triticum aestivum OX=4565 PE=3 SV=1	1.76978	1.240377e-07	MGEEAPAAVTAAATSPAPHLLLICFPGQGHVNPMLRLAKRFAAKGLLVTFSSTSYVGGKITASSGVEAGGDGVPLGRGRIRFEFLDDDFDGNDLDDLMRHLETTGPVVFAELLRRQEEAGRPVTCVVGNPFLPWAIDVAHDAGIPTAVLWVQSCAVFSLYYHHVHGLVEFPPEDDLDARVNLPGLPALSVADVPSFLLPSNPYKLLTDAILKQFRTIHKASWVFVNSFYELEPDVVDALPGISPPPPPLIPVGPLVELEEEGAVRGDMIKAADDCVGWLDAQAPRSVVYASLGSVVVLSAEELAEMAHGLASTGRPFLWVVRPDCSAMLPEGYLDSVAGRGMVVPWSPQDLVLAHPSTACFLTHCGWNSTLETLAAGLPVVAFPQWGDQCTDAKYLVEE…
tr|A0A3B6SF50|A0A3B6SF50_WHEAT	TraesCS7B02G131900	Uncharacterized protein OS=Triticum aestivum OX=4565 PE=4 SV=1	1.7488	2.498411e-06	MEVLCIGTADTKLEELLFLATCLRSSLAASASVPKVKVSIVDVSTTKTVPTQDSEDIAVIARDTVLSCYPDSSQQDLPDDRGEAIALMSKALQSFLKNRYEAGTLVAAVGLGGSGGTALIAPALRSLPLGVPKLIVSTVASGNTAPYVGTSDLVLFPSVVDICGINSVSRVILSNAASAVAGMVYGILMASNESDETDTKLTVGITMFGVTTQCANAVKDRLNKEGYETLVFHATGVGGKAMEELVRGGFIQGVLDITTTEVADYIVGGIMACDETRFDAAIDKKIPLVLSVGALDMVNFGAHDTIPAAFLDRKIHIHNEQISLMRTTLEENKKFAQFIADKLNKSLSTVTVCLPQKGISAIDAPGMPFYDPEATSALLDELNTRLVKTENRQVKLLPY…
tr|A0A3B6PLL9|A0A3B6PLL9_WHEAT	TraesCS6B02G227700	Uncharacterized protein OS=Triticum aestivum OX=4565 PE=3 SV=1	2.14663	2.411035e-07	MTAPADKGKKAKTDTDVGEENEQIDGALVLSIERLQEIQDELEKVNEEASDKVLEVEQKYSEIRRPVYLRRCDIIKTIPDFWLTAFLSHPLLSELLTEEDQKMFKYLESVDVDDSKDVKSGYSITLNFSENPYFEDRKLTKSYAFADDGTTTINATSIKWKEGMEINGNAIKKKGSKRPLVEESFFTWFTDTEHKSLADGVQDEVAEIIKEDLWPNPLKYFNNEVEEFEGDDEDEEGSDGEDAEEDDDEEN
tr|A0A3B5Z300|A0A3B5Z300_WHEAT	TraesCS1B02G376800	Formylglycinamide ribonucleotide amidotransferase OS=Triticum aestivum OX=4565 PE=3 SV=1	2.23739	1.711296e-09	MLKWQQAICYVFQAFLVIWENKGVVLYPQDTHLREVSSGVNSPLIEASGDDMGLVSRIIHFYRKPFLQESEAKELLRKVQAKVSSNIIDIKTEQCFNVELEDALGSTKLATLQWLLAETYEPDNLQTGSFLEEEVSRSPYCFLVEVGPRMTFSTAFSTNAVSICKALSLMEVTRLERSRRYLLCLQPGSDPLDESQLNSFAALIHDRMTECVYPSKLTSFRSDVVPEPVSVIPVMEKGREALEEINLKMGLAFDEQDIKYYTHLFRDDIKRNPTTVELFDIAQSNSEHSRHWFFNGKLEIDGETMPSTLFQLVKSPLKANPNNSIIGFKDNSSAIKGTLVNHLRPALPGSTSPLSLMMRELGILFTAETHNFPCAVAPYPGAETGAGGRIRDTHATGKG…
tr|A0A3B6QHJ7|A0A3B6QHJ7_WHEAT	TraesCS6D02G195300	PCI domain-containing protein OS=Triticum aestivum OX=4565 PE=4 SV=1	2.18186	3.373341e-11	MDGGGGGGSTSGDDGKQEKHLVLAHKLFLLSHPDVDDLSKVDLRSDVLSAVKSDDMAPLFESLAAAGVLEPDAVLLSEMRARIDEEIRKLDEKIADAEENLGESEVREAHLAKSLYFVKVGEKEKALEQLKVTEGKTVAIGQKMDLVFYTLQIGLFYMDFDLISKSVDKAKKLFEEGGDWERKNRLKVYEGLYCMATRNFKKATSLFLDSISTFTTYELFPYDTFIFYTVLTSIISLDRVSLKQKVVDAPEILAVISKVPHLSEFLNSLYNCQYKSFFVAFSGLTEQIKLDRYLQPHFRYYMREVRTVVYSQFLESYKSVTMEAMASAFGVTVDFIDQELSRFIAAGKLHCKIDKVAGVLETNRPDERNAFYQSTIKQGDFLLNRIQKLSRVIDL
tr|A0A3B6INC2|A0A3B6INC2_WHEAT	TraesCS4B02G144200	TCTP domain-containing protein OS=Triticum aestivum OX=4565 PE=3 SV=1	1.55502	1.332961e-06	MLVYQDKLSGDELLSDSFPYRELENGVLWEVDGHWVVQGAVDVDIGANPSAEGGGDDEGVDDQAVKVVDIVDTFRLQEQPAFDKKQFISHMKRYIKNLTAKLEGDDLDVFKKNVESATKYLLSKLKDLQFFVGESMHDDGGVVFAYYKEGAADPTFLYFAHGLKEVKC
tr|A0A3B6HPW4|A0A3B6HPW4_WHEAT	TraesCS4A02G096200	tRNA (guanine(26)-N(2))-dimethyltransferase OS=Triticum aestivum OX=4565 PE=3 SV=1	1.599	1.325484e-07	MGEVEDMLKDYEIKKEGEAEILMLASNAVFFNPVQVHNRDMSIAVLRTFVAKRKEEYEELMNKRNNKSHKKGNQVETPVVNGDTALTSQHDEIGVVHEKETNQATNEIEDLSKEETKTPSRKVTRELKPPIVLEALAASGLRSLRYAREVDGLGKVVALDNDKASIEACKRNIKFNGASAISKVEAHLADARVYMLTHPKEFDVVDLDPYGSPSIFLDSAVQAVADGGLLMCTATDLAVLCGTNGEVCYSKYGSYPVKGKYCHEMALRILLACIESHANRYKRYIVPVLSVYMDFYVRVFVRVFTSASEIKNTPLKLSYVYQCAGCDSFHLQSLGRTVTKNNSLKHAPGIGPVVPQECSDCGKKFNVGGPIWSAPIHDQDWVLSTLTDVRQMKDRYPAY…
sp|P05621|H2B2_WHEAT	TraesCS1A02G368000	Histone H2B.2 OS=Triticum aestivum OX=4565 PE=1 SV=2	1.85678	2.178727e-05	MPBKKPAAENKVEKAAEKTPAGKKPKAEKRLPAGKTASKEAGGEGKTRGRKKGSKAKKGVETYKIYIFKVLKQVHPDIGISSKAMSIMNSFINDIFEKLAGESAKLARYNKKPTITSREIQTSVRLVLPGELAKHAVSEGTKAVTKFTSS
tr|A0A3B6MTR9|A0A3B6MTR9_WHEAT	TraesCS5D02G238100	Peptidyl-prolyl cis-trans isomerase OS=Triticum aestivum OX=4565 PE=3 SV=1	1.56553	1.36986e-08	MGKDGKGKEAKGKGKQAAGSSDDAGGGKGGKGKGKGGKGGDDLGTCTFVKARHVLCEKQGKINEAYKKLQEGWLDNGDKVPPAEFAKVAQEFSECPSGKKGGDLGWFPRGKMAGPFQEVAFNTPVGATSAPFKSTHGYHFILCEGRKN
tr|A0A3B6I526|A0A3B6I526_WHEAT	TraesCS4A02G481800	Acetyltransferase component of pyruvate dehydrogenase complex OS=Triticum aestivum OX=4565 PE=3 SV=1	1.57564	2.733615e-06	MALLLRHSRKLRRVHGVLDCERGSIARHFSVAAAKEDAVSSSSVHGEYGKKVGRSSIFLHRQSEKDLHTFKVSSREARGSYSSKRMPIAATGVNSLFSCGQVVSARHFSSGADLPPHEAIGMPSLSPTMTEGNIARWVKKEGGKVSPGEVLCEVETDKATVEMECMEEGYLAKIVCGDGAKEIKVGEIIAITVEEEGDIEKFKDYKASSSPSAESKPQSEPVEPKEEKKEVSKAPEPTATKTEESSQSGDRLFSSPVARKLAEDNNVPLSSLKGTGPDGRILKADIEDYLSSAAKGSKKEAAAAPGLGYVDLPNTQIRKVTANRLLQSKQTIPHYYLTVDSRVDKLIKLRSELNPMQDASGGKKISINDLVIKAAALALRKVPACNSSWMNDFIRQYHN…
tr|A0A3B6AP33|A0A3B6AP33_WHEAT	TraesCS2A02G003600	NB-ARC domain-containing protein OS=Triticum aestivum OX=4565 PE=4 SV=1	3.83005	1.394151e-08	MELLLVKATLENAARKEISGPAMEELLQRLRDSAHNAQDLLNELDYFRIHDQLHGTYNAADQHDKGGVHDLALNARHTAKAVGKSVSCCPWQRAKRRQQRSRGDSSPAPAPDANQEASGCMPKLGNLLPCSSSQDPHVREEDCGSVQETPKLEFSRVDFSQKIKDIVDKLQPVRKDVNGLLQSCGPRSVPNIAQCRPVTRGRIDEPKLYGRDRVMNSIIHDITKGQYCDKALTVLPVVGSGGMGKTTLIQHIYRSQQVLDHFPVMIWICVSLNFSLDKVLEQIKTCTSEVENEKKSSTTEELIEQRLKSKRFLLVLDDIWQISNEDDWGKLLLTLNKSQENGSMILVTTRFQAIVEKVKATGHSIKLDGLESEDFRKLFLTFVFGDEQCPRDKHFLLDT…
tr|A0A3B6DCQ5|A0A3B6DCQ5_WHEAT	TraesCS2D02G258500	Uncharacterized protein OS=Triticum aestivum OX=4565 PE=4 SV=1	1.81584	1.282297e-10	MDSSSDNFVAPVDERQDPPLPNPSEEEAGGEEKERGEEKTLERAEELFDKGSKAIEEGDFVVAVDRLSRALEIRVERYGELASECASTYYKYGCALLYKSQEETDPLGNVPKSAPDEEPAKSTTNKDSGNSKASSSNVKDDDPSSDKGGLEGQNSNEKDQEDVDGESDKDGDEMGGEEDDSDLDLAWKMLDIARAIVEKNPDNTMEKVKIFSALAEVSMEREDIDNSLGDYFKALAILEHLVEPDHRRIVELHFRICLVYELASKIADAIPYCAKAVSLCKSRLESLKKAKATLLADKGDSASTADGDSKKLSIEDELEVVTGILPDLEKKLEDLEQAMATPSSEIEEIMKSIAAKAGFMQKAGNAVAPRAASLTSSQMGGVNNGFDSPTMSTAATSGS…
tr|A0A3B6RGA3|A0A3B6RGA3_WHEAT	TraesCS7A02G199000	Uncharacterized protein OS=Triticum aestivum OX=4565 PE=3 SV=1	1.64035	8.426842e-05	MAKKRGEKRPPPPPAASSEETHSGADESEDEETIAFSRTPAPKNPPPPPQKGEESETSDEEEEEEPSHAAPNTAPKKQPPPARQSEDSDSSDEEEDGGSESDKDAPPPKPSPKQEAKAPDAKKPRLAFHRVWSTNDEVRILEALAAHQKEHGVLPQPDALVEALAGKLDNRAYSSKELQGKVKSLKHRYVSAAKKYELPTKEHDRRRFDLCKIVWSGHKYRGRAATASTAAAATAKANNHEPKGFEEMCELYPYLAEEVKKSMFKREFGKMDDDKARLLDEKIKKQRVQQMKVELRRSDLGREVTKAIMDLID
tr|A0A3B6IKX2|A0A3B6IKX2_WHEAT	TraesCS4B02G029200	Uncharacterized protein OS=Triticum aestivum OX=4565 PE=4 SV=1	1.54666	4.780271e-09	MAASPTASASGSAAAAAAAASEANDGPTLSVVTKRLRALRKKQNRIAQMEEAVAAGKTLNQEQKEVMRSKPTLAAVIDELERLRAPLAVAVAEEVSVAPAPAPAPAPEPSGSDSSVQDLLALVYFGTLFDVKPQSDFIATMVAREHERSSCITYDCVGDDTVDLLVEGDLDVVSAVAALAAARPASAVGVSHRDALQACAHHARLWLARADEPIHPGSSVTYAAVRAKLDRIMASDYYTAAAVGGGSYGAEGVQAQESMTASPEASAVEENLAAEGHKEEKEDSHATEIYNDHQSDSADVQNDREAPVNPPEEYPSVQAEQEKFDMEEQDERDAEPKEQQFQHPRRSHQNQRGGGRGRRGAYPNGRGGRGGGRGMGGGYQNGRGYQGGGGGYQGGGGGY…
tr|A0A3B6KKG1|A0A3B6KKG1_WHEAT	TraesCS5A02G247200	Glucose-6-phosphate isomerase OS=Triticum aestivum OX=4565 PE=3 SV=1	1.73707	1.601425e-07	MASISGAAAPPSSSSACRLRLRRQLLMRPSHLRLRAPHSIADLSRSSGSPHAPAPPLASRAPGQGGGAAVEKDPIKLWDRYVEWLYQHKQLGLFVDVSRMGFTDDFLLQMEPLMQRAFVAMGELEKGAIANPDEGRMVGHYWLRDPGLAPNSFLRTKIEKTVDHILAFSQDVVSGKIKPPSSQAGRFTQILSIGIGGSSLGPQFVSEALAPDNPPLKIRFIDNTDPAGIDHQIAQLGEELKSTLVIVISKSGGTPETRNGLLEVQKAFRDAGLDFSKQGVAITQENSLLDNTARIEGWLDRFPMFDWVGGRTSELSAVGLLPAALQGIDVKEMLVGAALMDEETRNTVVKENPAALLALSWYWATDGIGSKDMVVLPYKDSLLLLSRYLQQLVMESLGK…
tr|A0A3B6RP07|A0A3B6RP07_WHEAT	TraesCS7A02G415500	Dolichyl-diphosphooligosaccharide--protein glycosyltransferase 48 kDa subunit OS=Triticum aestivum OX=4565 PE=3 SV=1	1.51047	6.733805e-05	MAAPRVLLLLAAAALLAVASLGDASGEGPRGRKLLVLVDDLAVRSSHSAFFGSLQARGLDLEFRLADDPKLSLHRYDHSASDLIRGIATECGVDFDEDPEAMVIDHINYASSEVEGDHTLIAGDDLIQSDVILGSKKIEAPVLFRGIGHAANPSNSLVLKVLSASPSAYSANPEAKLASVPSLTGSAISLVSVMQARNNARVLISGSLDLFSNRFLKSGVQKAGSKMSHDKAGNEQFVTETSKWVFHERGHLKAVNVKHHKVGETNEPSMYRINDDLEYSVEIYEWSGTSWKPYVADDVQIQFFMMSPYVLKNMSTDKTAVYSASFKVPDVYGVFQFKVEYQRLGYTGLSLAKQIPVRPYRHDEYERFITSAFPYYAASFSTMGAFFIFSVAYLYHK
tr|A0A3B6R826|A0A3B6R826_WHEAT	TraesCS7A02G065500	PCI domain-containing protein OS=Triticum aestivum OX=4565 PE=3 SV=1	1.6656	6.422732e-07	MDPKLVEVTQLFDRFKAAFKASNFDVCSTLLSQLKVLLTKFPSLPPLFQQTPNAVEELKLAREIYEQAVILSVKMEDQDAFERDFCQLKPYYMDTCGIIPPSSEEYPIMGANLLRLLVQNRIAEFHTELELLPAKALDNAYIKHGVELEQSFMEGAYNRVLSARQTAPHETYIYFMDLLVKTVRDEIAGCSEKGYDYLSINDAKQMFKFSSDKELQQYIAEEHPEWDVKDGRVLFQKAKESQPCKEIPAAPVINQTLGYARELERIV
tr|A0A3B6IPP5|A0A3B6IPP5_WHEAT	TraesCS4D02G133600	SOR_SNZ domain-containing protein OS=Triticum aestivum OX=4565 PE=3 SV=1	1.93452	3.86697e-07	MASDGVVALYGNNKAVVEPSAKPAAATFSVKVGLAQMLRGGVIMDVVTAEQARLAEEAGACAVMALERVPADIRAQGGVARMSDPALIRDIKRAVTIPVMAKARIGHFVEAQILEAIGVDYVDESEVLTLADEAHHINKHNFRVPFVCGCRDLGEALRRIREGAAMIRTKGEAGTGNVVEAVRHVRSVMGAVRALRNMDEDEVFSYAKQIAAPYDLVMQTKQLGRLPVVQFAAGGVATPADAALMMQLGCDGVFVGSGIFKSGDPARRARAIVQAVTHYSDPEILANVSAGLGEAMVGINLSDPGVERFAARSQ
tr|A0A3B5YWW1|A0A3B5YWW1_WHEAT	TraesCS1B02G210900	PCI domain-containing protein OS=Triticum aestivum OX=4565 PE=3 SV=1	1.80503	1.188333e-08	MALQYVEAQRQARPDLADWYADLADLYQRKLWHQLTLKLDQFLQIPAAQTGDTLIQLYNNFISDFETKINLLKLAQFAVIASRQYPDKDAAITFLEGIITKLRETRELRINEPILHVKMQIAAIHLDKGNHKECKNLLEEGKTTLDGMTDVDPTVHASFYWISSQYHKSLQEFAEFYKNALLYLAYTTVGSLSESFKLDLAFDLSLAALLGDNIYNFGELLAHPIINSLIGTKVEWVYHMLQAFNTGNLALYQELCGVHNAALSAQPALVQNEQKLLEKINILCLMEIIFSRPSEDRTIPLSVIAKQTKLSTSEVECLLMKSLSVHLIEGIIDEVDSTVHVSWVQPRVLGIPQVKALRERLDSWVGKVHTTLLSIEAETPDLVAA
tr|A0A3B6PE52|A0A3B6PE52_WHEAT	TraesCS6B02G008200	AAI domain-containing protein OS=Triticum aestivum OX=4565 PE=3 SV=1	2.64964	0.02308	MWMKTMFLVLLLCMLVATPMAAEYGVGSHNSGPWMWCDPAMGHRVSPLTGCRAMVKLQCVGNQVPEAIQRDCCQELANITNDWCRCHDLGSMLNSVYQELGAREGTEVFPGCRKEVMKLTAASVPAVCKVPIPNARGGEGVCYWA
tr|A0A3B6Q8W4|A0A3B6Q8W4_WHEAT	TraesCS6D02G009100	Uncharacterized protein OS=Triticum aestivum OX=4565 PE=3 SV=1	2.32428	1.47569e-07	MASPFGGASTCGLKGATPSGFATRKQLSLVSPPLVSLPQRARPGRKCSFRVNAAKELYFNKDGSAIKKLQTGVNKLADLVGVTLGPKGRNVVLESKYGSPRIVNDGVTVAKEVELEDPVENIGAKLVRQAAAKTNDLAGDGTTTSVILAQGMIAEGVKIVAAGANPVQIARGIEKTTKALVGELRKMSKEVEDSELADVAAVSAGNNYEIGNMIAEAMSKVGRQGVVTLEEGKSAENNLYVVEGMQFDRGYISPYFVTDSEKMSVEYENCKLLLVDKKINNARDLITILEEAIKGAYPILIIAEDIEQEALATLVVNRLRGALKIAAIKAPGFGERKSQYLDDIATLTGGTVIREEIGLSLDKADKEVLGNAAKVVITKDSTTIVGDGTTQEEVTRRVT…
tr|V9P7D3|V9P7D3_WHEAT	TraesCS1D02G007400	LMW-m glutenin subunit 17 (Fragment) OS=Triticum aestivum OX=4565 GN=Glu-3 PE=4 SV=1	2.10535	7.89508e-07	METSCIPGLERPWQQQPLQQKETFPQQPPSSQQQQPFPQQPPFLQQQPSFSQQPLFSQKQQPVLPQQPAFSQQQQTVLPQQPAFSQQQHQQFPQQQIPVVQPSVLQQLNPCKVFLQQQCSHVAMSQRLARSQMWQQSSCHVMQQQCCQQLPQIPEQSRSEAIRAIVYSIILQEQQQGFVQPQQQQPQQSGQGVSQHQQQPQQQQQLGQCSFQQPQQLQQLGQQPQQQQIPQGIFLQPHQISQLEVMTSIALRTLPTMCGVNVPLYSSTTIMPFSIGTGVGAYKG
tr|A0A7H4LNA5|A0A7H4LNA5_WHEAT	TraesCS2D02G469500	Genome assembly, chromosome: II OS=Triticum aestivum OX=4565 GN=CAMPLR22A2D_LOCUS4722 PE=4 SV=1	1.69982	0.0022238	MVSFVPYMTATNIMLQIIQKLAKDDENYIRDDVDRKFKYQIRGKKYLLVVDGEVSSTEWKNILPNLKLGAKGSRIVHITQYKPEEPSVSYHHEIIKLECLGQKKAIELFHKRLLHIDVHDENLHEHHQVMHKITEGLPLGIVLLSGLVQTKESQSEWNNVFDYLKSNQSKRLHRIISMCFDDLPPELKCCFLYFAALPTNIKIESHILVCMWMAEGFLRPSVGKTMEKLGYIYLNELIARNLVKPVNMDEEDTSSAGKIFVAIQNKVHEFLQFQAQEASFVEVHSGDDIPTLTSARRLSLQNSVDEHVSLQNSTDKYSVLASYLPKLRSIFSHFEQDPKEPKEDKTYLCCSPQIRKISKWKRNKYIKSHIQGLLDRSEFLRVINLQGIEIGKRLPDEIG…
tr|A0A3B6IWU9|A0A3B6IWU9_WHEAT	TraesCS4B02G265700	PCI domain-containing protein OS=Triticum aestivum OX=4565 PE=3 SV=1	2.47852	3.234925e-06	MDVQMGEPQAAPPSAAVEAAPAPSTLHHLKEIAAVIEAGSLSKEVRRISRAVRLTVALRRRLAARDVSAFLAFALPVSSDAYARLTPLLPKEDEAEMDIDAAAPATQISIKHGLPEIEIYCSLLVLIFLIDQKKYDEAKACATGSIARLKNLNRRTVDVLASRLYFYYSYVYELTNTLAEIRGNLLGLHRMATLHHDELGQETLLNLLLRNYLHYNLYDQAEKLRSKAPRFEAHSNQQFCRYLFYLGKIRTIQLEYTDAKESLLQAARKAPAAARGFRIQCNKWAIIVRLLLGEIPERTVFMQKGMKEALAPYFELTNAVRIGDLELFRAVADKFASTFSADRTHNLIVRLRHNVIRTGLRNISISYSRISLADIAKKLRLDTENPVADAECIVTKAIR…
tr|A0A3B6KFF3|A0A3B6KFF3_WHEAT	TraesCS5A02G168400	Protein phosphatase 2A structural subunit OS=Triticum aestivum OX=4565 PE=4 SV=1	2.53746	1.546151e-07	MAMVDEPLYPIAVLIDELKNEDIQLRLNSIRRLSTIARALGEERTRKELIPFLSENNDDEDEVLLAMAEELGVFIPYVGGVEHAHVLLPPLETLSTVEETCVRDKAVESLCRIGAQMKENDIVDYFIAVVKRLAAGEWFTARVSSCGLFHIAYPSATDPLKTELRTIYGQLCQDDMPMVRRAAASNLGKFAATVEQSHLKTEIMSIFDDLTQDDQDSVRLLAVEGCAALGKLLEPQDCVAHILPVIVNFSQDKSWRVRYMVANQLYELCEAVGPEPTRADLVPAYVRLLRDNEAEVRIAAAGKVTKFCRILSPQLAIQHILPCVKELSSDSSQHVRSALASVIMGMAPVLGKDEFPDVRLNIISKLDQVNQVIGIDLLSQSLLPAIVELAEDRHWRVRL…
tr|A0A3B6JMX2|A0A3B6JMX2_WHEAT	TraesCS4D02G298100	Eukaryotic translation initiation factor 3 subunit K OS=Triticum aestivum OX=4565 PE=3 SV=1	1.67398	1.770213e-09	MANEQPAETYTVEELVAVNPYNPDILNDLEVFVNDQVSSKTYNLDANLSLLRLYQFEPERLSVQIVARILIKALMAMPAPDFSLCLFLIPEHVQMEEQFKTLIVLSHYLETGRFRQFWDEASKSRNILDVVPGFEQAIQSYAIHVLSLTYQKVPRPVLAEAINIEGLALDKFMEYHAANSGWVIEKGSRSQLIVLPRNEFNHPELKKNTADTVPFEHVTRIFPILS
tr|A0A3B6N4I9|A0A3B6N4I9_WHEAT	TraesCS5D02G565400	ATP-dependent DNA helicase 2 subunit KU80 OS=Triticum aestivum OX=4565 PE=3 SV=1	1.57174	3.834688e-05	MARNKEGLVLLLDVGPTMHRALQEVKNVCTTLLRKKLVFHRSDEVGVVLFGTKETHNDLARELGGYKHVLVKHDIKVVDEETKDALENLPRGTAPGDFLDAIVVGLDMLIKRFGDTKAKQRLCLITDAQHLLRDPPQGTKEDQVDTIADQMKKHDIKMDCIVFRESGVQHNSVMDENDRLLYHFRDRSVAKVVQVDTPTALLGALKTRNVLPVTIFRGDLEVSSTFKIKVWAYKKTSEEKFPTLKKYSDKAPPSDQFASHEVKVDYEYKSILEPDTVVPPDQRIKGYLYGPQVVPISSAEWEAVKFKPEKGVKLLGFADRSSIPRSYFMKDVNSFVPEPGNTKAIVAVSALARAMQEMNKVAILRCVWRQNQANVAFGVLTPNISSVNNVPDSFYFNIL…
tr|W5C3E3|W5C3E3_WHEAT	TraesCS2D02G010700	Pyruvate dehydrogenase E1 component subunit alpha OS=Triticum aestivum OX=4565 GN=CAMPLR22A2D_LOCUS100 PE=4 SV=1	1.57166	7.30489e-07	MAAASFTAAKFLAPAAARSGGDRAPFPAPSAFSMRSLRHRPARRLSSVLAVSSDVLKAAPAAAAYPAVTREEALELYEDMILGRNFEDMCAQMYYRGKMFGFVHLYNGQEAVSTGFIKQLNQPDCVVSTYRDHVHALSKGVPARAVMAELFGKATGCCRGQGGSMHMFSEPHNLLGGFAFIGEGIPVATGAAFAAKYRHEVLKQSSPDGLDVTLAFFGDGTCNNGQFFECLNMAQLWKLPIIFVVENNLWAIGMSHLRSTSDPEIWKKGPAFGMPGVHVDGMDVLKVREVAKEAIDRARRGEGPTLVECETYRFRGHSLADPDELRRPDEKSHYAARDPITSLKKYIIEQNLASEAELKNIEKKIDDVVEEAVEFADASPLPPRSQLLENVFADPKGFG…
tr|A0A3B6TLP3|A0A3B6TLP3_WHEAT	TraesCS7D02G134800	AAA domain-containing protein OS=Triticum aestivum OX=4565 PE=3 SV=1	1.97132	3.302883e-06	MSSPAPAAAAPMAVDDAEDDQMASMSVEDVGRASRLLDNETRVLKDELQRTNLEVETFESKTKENQEKIKLNKQLPYLVGNTVEVLEMNPEDEAEEDGANIDLDSQRKGKCVVLKTSTRQTIFLPVAGLVDPDTLKPGDLVGVNKDSYLIIDTLPSEYDSRVKAMELDEKPTEDYNDVGGLEEQIQELVEAIVLPMTHKDRFQKLGIRPPKGVLLYGPPGTGKTLMARACAAQTNATFLKLAGPQLVQMFIGDGAKLVRDAFQLAKEKAPCIIFIDEIDAIGTKRFDSEVSGDREVQRTMLELLNQLDGFSSDDRIKVIAATNHADILVPALLRSGRLDRKIEFPHPSEEARARILQIHSRKMSVNPDVNFEELARSTDDFNGAQLKAVCVEAGMLALR…
tr|A0A3B5XW32|A0A3B5XW32_WHEAT	TraesCS1A02G067000	Uncharacterized protein OS=Triticum aestivum OX=4565 PE=4 SV=1	2.60951	0.00331361	MPRRSRQAGGAAHSLHLRHPDELLLPRASSGPRACLIWPPPKDRPQTNEIVASTVLKCLCCAKRTDEAVNVLIHRMSDLGCVPNEFSYKTVLKSLCEDSRSQRALDLLRVMAKGDGCSPCVVSYSTVIYGFFKEGKVGKACNLFHEMTQQGVVSDVVTYNSIIDALCKARAMDKAELFLRQMVDDDIRPNGVTYNAMIHGYSTLGQWKKATQMFREMTSRGLVPDTVTWNSCMASLCKHGRSREAAELLYSMAAKGHKPNVVSYSTLLHGYANEGCFADMVNLFNSMVGKGIVPDHHVFNIFINAYAKCGMMDEVMHMLTEMREQGMSPDVCTYATIIAALCRMGRLADAVDNFNQMIGKGVQPSKVVYRSLIQGFCTHGDLVKAKEFIFEMTDKCICR…
tr|A0A3B6DFJ1|A0A3B6DFJ1_WHEAT	TraesCS2D02G341500	PCI domain-containing protein OS=Triticum aestivum OX=4565 PE=4 SV=1	3.50416	1.006472e-07	MDGGGEEGNQQPQLVLAHKLFLLSQPDVDDLAKVGLRDDVLAAVKSDDMAALYESLAADGVLEMDAALLAEMRGRIEEETKKLDEKITDAEENLGESEVREAHLAKSLYFIRVGEKEKALEQLKVTEGKTVAVGQKMDLVFYTLQIGLFHMDFDLISKSVDKAKILFEEGGDWERKNRLKVYEGLYCMATRNFKKATSLFLDSVSTFTTYELFPYDTFIFYTVLTSVITLDRVSLKQKVVDAPEILAVISKVPHLSEFLNSLYNCQYKSFFVAFSGLTEQIKLDRYLQPHFRYFMREVRTVVYSQFLESYKSVTMEAMAASFGVTVDFIDQELSRFIAAGKLHCKIDKVAGVLETNRPDARNAFYQSTIKQGDFLLNRIQKLSRVIDL
tr|A0A3B5ZPK2|A0A3B5ZPK2_WHEAT	TraesCS1D02G029400	PUM-HD domain-containing protein OS=Triticum aestivum OX=4565 PE=4 SV=1	1.95676	6.757191e-06	MVTEMATRGGGDAVCGGGEEGERGDFELFRSGSAPPTVEGAMAMASGGGGEVLLDDELRADPAYQSYYYSNAHLNPRLPPPLLSKEDWRSAQHRLRSSSSSSAAAGLGGIGDGRRAPGDGLVSLPGIDHPRQRGFSGIFQEDSNQRDMDRQGANHNRNDFLDSSGMQYALHRETGAMSGLQRESNEQTMADIRNNELSSHAYASILGPSLSRSASPDPELVRRVPSPCLPPIGVKVGAYDKKSNGGSSSFRRSSSAVGEPDDLVAALSGMNLSSSRAGNGQAMDQSKLYQDVDNANRFLFDQTSGNQQHSFMKRPEQGHFRAPEGYSANSSMMRNQMNGGNFTSSDNSLVGSGYASPRIGARSPGGTLSSRQNLAGASNYLGYNGVGSPTGAASLQMPI…
tr|A0A3B6C920|A0A3B6C920_WHEAT	TraesCS2B02G302100	Uncharacterized protein OS=Triticum aestivum OX=4565 PE=3 SV=1	1.57745	0.00130403	MDWAARRSLLLLALFMPPYYVYKLTASAAATVAPQDVAGKVVLVTGVSSGIGEQIAYQYAKKGARLALVARREGSLREVAAKATDLGSPDVLVVPGDVARPEDCKAFVQATVECFGRLDHLVNNAGLVNVCWFEEMPDVATFKQVLDVNFWGTVHPTHAALPHLTRSRGKIFVNSSAAAVLAMPRMSFYNASKAAVLSFADTLRMELGDEVGVTVATPGWIESEMTKGKHLSKGGRIEAQVGLFPVVRAERCAEAIVDAVCRGRRSVTVPLWYRALFLWRSLAPEVGDVLQRVFYRRSSGDGGRQMRARRVLEVTGAKRVLQPPSLHTSDIKRE
tr|A0A3B6TYE2|A0A3B6TYE2_WHEAT	TraesCSU02G005900	Replication protein A subunit OS=Triticum aestivum OX=4565 PE=3 SV=1	1.71953	3.70119e-06	MLGNCVAPRVEQSTNNQSYGGPYNGVHSPADPSIGRTLQPGPNNVSSGGSYGTMPAQNTMNGGNMAQPNSQRPYNGVHSPVGPSIGRTVQPGPNNVSPGGPYGAMSAQNTMNGNMVQPNSQRPLLNSHQNQRFAIPGTGGGISPPGNVYGRPAQPSYQQPPPAYTNNGPAAKNGAALRTVPISALNPYQRTWTIKARVSAKSQVKHYNNARGPGKLFNFDLRDAHGGEIRAVCFNTQLDQFYDLIEVDKVYLISRGSLKPANKQFNHLNNDYEVSLDAATTIEVCSDDDSSIPRQQFDFRQISEIANMDKDTMVDLLGVVTSVSPSSPFTRKDGVETQKRVLQLRDMSGCSVEITFWGGFCNAEGQQLQSLCDSGSNPVLALRSVRVGEFKGRNVSTIG…
tr|A0A3B6LQ01|A0A3B6LQ01_WHEAT	TraesCS5B02G296200	STI1 domain-containing protein OS=Triticum aestivum OX=4565 PE=4 SV=1	1.93941	3.171962e-10	MASDPNKDSKSEGLSEAKKGASPTAGAGLPSPFDFSNMSSLLNDPSIREMAEQIASDPVFNQMAEQLQKSAQGAGEQGVPNLDPQAYMETMTQVMQNPQFMSMAERLGNTLMQDPAMSSMLENLTSPAHKEQLEERMARIKDDPSLKPILDEIERGGPSAMVKYWNDPEILQKIGQAMSLNFPVDAATSTVLSGPQETDEEGEDDDESIVHNTASVGDAEGLKKALDGGANKDEEDLEGRRALHFACGYGELKCAEILLEAGAAVDALDKNKNTPLHYAAGYGRKECVDLLLKHGAAVTLQNLDGKTPIEVAKLNSQGEVVKLLEQDVFL
tr|A0A7H4LNV6|A0A7H4LNV6_WHEAT	TraesCS6A02G215000	Genome assembly, chromosome: II OS=Triticum aestivum OX=4565 GN=CAMPLR22A2D_LOCUS4925 PE=4 SV=1	1.61644	6.760828e-07	MRRARKKILKVINLTTRSLSQPHERMQRWKGSRRGCRLTNLSGQAAHGGAQVQADHLLRPPLEAPTTEYEKIRAKNMMRNNCIFQSLGIAALGMMETCQLNKKNRSKVKFHQKTGSRPYISHVHALKEARKGEVLTAFDLFKECHYGKKTGFS
tr|A0A077RZI5|A0A077RZI5_WHEAT	TraesCS3B02G207500	Uncharacterized protein OS=Triticum aestivum OX=4565 GN=TRAES_3BF074200070CFD_c1 PE=3 SV=1	1.54084	1.904174e-08	MDGGGGMGPVGGGVGGMVGPVGVGGGGGGSDVELVSKTLQFEHKLFYFDLKENPRGRYLKISEKTSTTRSTIIVPIAGVAWFLDLFDYYIRTDERDVFSKELRLDTKVFYFDIGENKRGRYLKVSEASVNRNRSTIIVPAGSSGEEGWEAFRNVLLEINDEASRLYVLPNHPSQQHLEPPERLPGLSDDVGAGFIAGHGSQSASVPEVDVDGPPIEEFSGMGLSKVIRADQKRFFFDLGSNNRGHYLRISEVAGADRSSIILPLSGLKQFHEMVGHFVDIMKDRLEGMTGANVRTVEPSQR
tr|A0A3B5Y5L5|A0A3B5Y5L5_WHEAT	TraesCS1A02G379300	Nop domain-containing protein OS=Triticum aestivum OX=4565 PE=3 SV=1	1.52348	6.148301e-05	MALYLLFESASGYALFHAHGIDEIGQSVDAVRSTVLDLKRFSKAVKLAGFTPFLSAVDALNQCNAISEGIMTDELRNFLELNLPKVKEGKKAKFRVGVMEPKVGSHITEATGIPCESNDYVQELLRAVRLHFDQFIDQLKPSDLEKAQLGLGHSYSRAKVKFNVNRVDNMVIQAIFLLDTLDKDVNSFSMRVREWYGWHFPELVKIVNDNYLYAKLAKFVVNKSDLSEKDIPALADLIGDEDKAKEIVEAAKASMGQDLSPVDLINVQQFAQRVMNLSEYRKNLYEYLVTKMNDIAPNLTSLIGEMVGARLISHAGSLSNLAKCPASTLQILGAEKALFRALKTRGNTPKYGLIFHSSFIGRASTKNKGRMARYLANKCSIASRIDCYSDMSSSIFGEK…
tr|Q8S3J1|Q8S3J1_WHEAT	TraesCS6D02G055400	60S ribosomal protein L13 OS=Triticum aestivum OX=4565 PE=2 SV=1	1.59873	0.000331292	MKARAGRGFTLEELKSAGIPKKLAPTIGISVDHRRKNRSLEGMQSNIQRLKTYKAKLVIFPRRARKVKAGDSTPEELANATQVQGDYMPIARGEKRSVEVVKVTEEMKEFKAYGKLRVERMNQRQLGARQKKAAEAEKEEKK
tr|A0A3B6JQ60|A0A3B6JQ60_WHEAT	TraesCS4D02G350200	PCI domain-containing protein OS=Triticum aestivum OX=4565 PE=4 SV=1	1.70716	1.244168e-08	MDVDCEVSAAAAAAVTNGLGGGEQAAAAPVSADQLDVEAYAAQYSGRTRVARLLFIAERCGVEAIQLEALRMAHDEARAREDTVLYLDAVLKINGRLGPRYRHDQAWVDSVNRRAEQRKEKLETELNGYRTNLIKESIRMGYNDIGDFFYAHGHLSEAFKSYIRTRDYCTTSKHIVQMCMHVILVSIELGQFAHVTNYVSKAEQTPDTLDAVIVAKLRAAAGLANLETKKYKLAARKFLETGPELGSNYSEVIAPQDVAVYGALCALASFDRSELKSKVIDNINFRNFLELVPEVRELVNDFYASRYGSCLEHLEKLKPNLLLDIHLREHLGTLYNDIRHKAIIQYTLPFISVDLNTMASAFKSSVSMLEKELAALITENKIQARIDSHNKILYARHAD…
tr|A0A3B6KKY9|A0A3B6KKY9_WHEAT	TraesCS5A02G261900	Eukaryotic translation initiation factor 3 subunit E OS=Triticum aestivum OX=4565 PE=4 SV=1	1.51626	2.141637e-05	MAEHDLTASVAAWMDPHLVLPVLEFLQERGVYADEEILRGKIRLLGGTNMVDYAMDIHKSLHGTDDVPADMVARRSEVVERLRALQEAVAPIVAFLSSPQLVQELHADKQYNLHMLQERHQIGPDQIEALYQYAKFQYECGMYSDAADFLSQYRALCTNSERSLSALWGKLAAEILMQNWDVAQEELNRLKEMIDSSSFTSSPVNQLHSRIWLMHWSLFIFFNHENGRNGIIDLFFQDRSRTATRIPSLNSWSACMSSMILMALSRSLSSASRLY
tr|W5CXF2|W5CXF2_WHEAT	TraesCS3A02G186600	Uncharacterized protein OS=Triticum aestivum OX=4565 GN=TRAES_3BF029700060CFD_c1 PE=4 SV=1	2.49634	3.245622e-08	MAAAAPADAKAEAAKMDLLEDDDEFEEFEIDQEWDDKEDGNEAVQQWEDDWDDDDVNDDFSLQLRKELEGGNTQKS
tr|A0A3B6HR37|A0A3B6HR37_WHEAT	TraesCS4A02G115300	Uncharacterized protein OS=Triticum aestivum OX=4565 PE=4 SV=1	1.91418	1.284389e-06	MLSGDVPPNQTVYFRNLNEKVKKEELKRSLYALCSQYGRIVDVVALKTHKLRGQAWVAFSEITAATNAFRGLQDFDFYGKKMRVQYAKTKSDCFAKADGSYAPKEKRKKQEEKAAEKKRRTEDGQQPGASAPVAPSNGTGHQPSRFAKPPQEPAAPPNNILFLQNMPDQTTSMMLQILFQQYPGFREVRMIEAKPGIAFVEYEDENQSMVAMEALQGFKISPENPMAISYAKK
tr|A0A3B6B8Q5|A0A3B6B8Q5_WHEAT	TraesCS2A02G534000	AAI domain-containing protein OS=Triticum aestivum OX=4565 PE=3 SV=1	1.58089	2.446714e-06	MARSVVLAMCVVFVVVVAGGAMPQKLVCSAKLYMLAPCDSVIKEEPWSAPSTLCCSNLRALEQEGCICPYLQDPVYYGYINRPNLLKTLTSCGIRIPPACPTI
tr|A0A3B6LP51|A0A3B6LP51_WHEAT	TraesCS5B02G267500	Uncharacterized protein OS=Triticum aestivum OX=4565 PE=4 SV=1	1.83559	0.0101221	MASQLVESHRTGAEVHKGNDICKQKTVELLKELGLPKGLFPMDDIEEVGHNCESGFVWMLQKKKNEHTFKKINQTVSYDTEVTAFVEKGKMKKVTGVKIEDLSLVEVYMDESSADKVTVKTNTGLSDTHDATVFALGE
tr|A0A3B6LIS6|A0A3B6LIS6_WHEAT	TraesCS5B02G116300	Dihydrolipoamide acetyltransferase component of pyruvate dehydrogenase complex OS=Triticum aestivum OX=4565 PE=3 SV=1	1.53474	1.381592e-05	MAGLLHLHSTLLPSASLLRQRGGAQAVPRRRRACRVEAKIREIFMPALSSTMTEGKIVAWNAAEGDRLAKGDPVVVVESDKADMDVETFHNGFLAAVLVPAGESAPVGSAIALLAESEEEIPLARSQAANFSSSAAASPPAPQETVAQEASPAPPPPPPPAPVAVSAPAPPSPATQGGARVVASPYAKKLAKELSVDLFAVTGSGPGGRVVAKDVEAAAAAPKKAAPVPAARQDVPLGSTVPFTTMQGAVSKNMVESLAVPAFRVGYTITTDALDALYKKIKAKGVTMTALLAKATAMALVQHPVVNSSCRDGQSFTYNSSINIAVAVAIDGGLITPVLQDADKLDIYSLSRKWKELVDKARAKQLQPQEYNSGTFTLSNLGMFGVDRFDAILPPGTGA…
tr|A0A0G3F720|A0A0G3F720_WHEAT	TraesCS1D02G063500	Endosperm transfer cell specific PR60 OS=Triticum aestivum OX=4565 PE=2 SV=1	1.76624	1.704426e-07	MAKLMCLCFIILTIAVVVSADECEGDRQEMIKQCAKYQQWPANPKVNPSDACCAVWQKANIPCLCAGVTKEKEKIWCMEKVAYVANFCKKPFPHGYKCGSYTFPPLA
tr|A0A0C4BKA8|A0A0C4BKA8_WHEAT	TraesCS6B02G207100	AAA domain-containing protein OS=Triticum aestivum OX=4565 PE=3 SV=1	2.2737	1.239089e-08	MATVAMDISKPPPAASGDESAKGARGGGEGLRQYYLQHIHDLQLQIRQKTHNLNRLEAQRNDLNSRVRMLREELQLLQEPGSYVGEVVKVMGKSKVLVKVHPEGKYVVDIDKSIDITKITPSTRVALRNDSYMLHLVLPSKVDPLVNLMKVEKVPDSTYDMIGGLDQQIKEIKEVIELPIKHPELFESLGIAQPKGVLLYGPPGTGKTLLARAVAHHTDCTFIRVSGSELVQKYIGEGSRMVRELFVMAREHAPSIIFMDEIDSIGSARMESGTGNGDSEVQRTMLELLNQLDGFEASNKIKVLMATNRIDILDQALLRPGRIDRKIEFPNPNEDSRGDILKIHSRRMNLMRGIDLKKIAGKMNGASGAELKAVCTEAGMFALRERRVHVTQEDFEMAV…
tr|A0A0A7AAD7|A0A0A7AAD7_WHEAT	TraesCS5A02G003300	Grain softness protein (Fragment) OS=Triticum aestivum OX=4565 GN=Gsp-1A PE=4 SV=1	3.27786	0.0258284	ALVVNTAIAQYAEVPSPAAQAPTADGSGEWVAIAPSASGSENCEEEQPKLDSCSDYVMDRCVTKDMPLSWVFPQTWGKRSCEEVQNQCCQQLRQTTPRCRCKAIWTSIQGDLSGFKGLQQGLEAKTVQTAKSLPSKCNIDPKYCNIPIT
tr|A0A3B6SFN6|A0A3B6SFN6_WHEAT	TraesCS7B02G206000	Uncharacterized protein OS=Triticum aestivum OX=4565 PE=4 SV=1	1.52119	2.547393e-09	MVGLSEGEKHFIRGGIAQDLRADGRTRLQFRALTVETGIIPQANGSARVRMGATEVIASVKAELGKPTILHPDKGKVSIYVDCSPTAAPMFEGRGSEELSAELSVALQRCLLGGKSGAACWDLYIDGLVVSSDGNLLDALAAAIKVALSDTGIPKVNVSLNNETDGEPEVDISDEEFLQFDTSGVPVIITLTKVGKHYIVDATSEEESQMSSAVSVSVNSHGQICGLTKRGGAGLDPSVIFDMISVAKNVSQRFYTLLESAIAAAEAVADE
tr|A0A159KHW5|A0A159KHW5_WHEAT	TraesCS1B02G041928	Omega-secalin OS=Triticum aestivum OX=4565 PE=4 SV=1	1.55591	6.039929e-09	MKTFLISVLAMTMSIVTTARQLNPSEQELESPQQPVLKEQSYPQQPYPSHQSFPTPQQYSPYQPQQPFPQPQQPTTIQPQRPFPQQPQQPFPQPQQQLPLQPQQPFPQPEQPIPQQPQQLFPQQPQRPQQQFPQQPQQIIPQQTQQPFPLQPQQPFPQQPQRPFAQQPEQIISQQPFPLQPQQPFSQPQQPFPQQPGQIIPQQPQQPSPLQPQQPFSQQPQRPQQPFPQQPQQIIPQQPQQPFPLQPQKPVPQQPQRPFGQQPEQIISRRPQQPFPLQPQQPFSQPQQPFPQQPGQIIPQQPQQPFPLQPQQTFPQQPEQIISQQPQQPFPLQPQQPSPQQPQLPFPQPQQPFVVVV
tr|A0A3B6GR50|A0A3B6GR50_WHEAT	TraesCS3D02G077600	XH domain-containing protein OS=Triticum aestivum OX=4565 PE=4 SV=1	1.56199	7.809917e-08	MAANQTPRAPTHADPLQAPSTGSESIHNESSEARLRRIHANLRLLDPPVAPSARALGLLDFVRLDLSSSGAPRPDLVAELIANYEPEYSKPGWSSVRGQKIEDSLDSFAQALCLPGRPRRSGPASTVVASAAKEFMNIYILAPIKASTDRKRRLPIVLDCNSSCVQYRRAHRVYWTGLLWDRVDDEMEHLIKKSTNRACYYGAYLQRLIWAQRPDLFQLPPQPFVADAPSEPVPLESHKERGINRSTINDNQNRGSEAMSENIEARSEKVKVDAALEKINAASKVMIDTALEKIDAASKVMIDAALEKIDAASKVVIDAALEKIDAASKVVIDAALEKIDAASKMIEATSKQHDARAGEQDANMQEMQSLVQMLVTKERQSNVELQRARKILIDELQKF…
tr|A0A3B5YU22|A0A3B5YU22_WHEAT	TraesCS1B02G135300	PLAT domain-containing protein OS=Triticum aestivum OX=4565 PE=4 SV=1	1.72172	5.742679e-07	MAPFCAAQEAAVRTCTYTVKVKTSCASPARTSDAVSVAFGDAYRNEAYGARLPSAPGGRAFERCGTDTFRVSGVCGYGVGYLYLRRAGRDGWAPEWVQVTEPGPGAGEKPATFYFGAPLPDGVWYGHNRCPKAKAKAAAAARTNTTSAAASPLG
tr|A0A3B6C4P9|A0A3B6C4P9_WHEAT	TraesCS2B02G253600	PCI domain-containing protein OS=Triticum aestivum OX=4565 PE=3 SV=1	1.79823	8.941923e-08	MAMDAERRQAELIEQFSAQAAALSSAPQLAALVLEATSHPALFAFSELLTLPALSKLTGTQYASSLDLLRLFAYGTLKDYKSNSSALPALLPDQARKLKQLSVLTLAESTKVLPYDQLMQELDVSNVRELEDFLINECMYSGIVRGKLDQLRRCFEVQFAAGRDLTPDQLTNMIETLSDWLGTSDNLLHHIQEKIKWADTTSELNKKHQKEFEDRVEEAKKSVKKLNNVSRQTMTYGGMTTFSLNLEE
tr|A0A3B6N0L8|A0A3B6N0L8_WHEAT	TraesCS5D02G490000	Dihydrolipoamide acetyltransferase component of pyruvate dehydrogenase complex OS=Triticum aestivum OX=4565 PE=3 SV=1	1.5315	2.258475e-05	MAASSAPLAFSASASALSARLRLAAPAASCAATTRRRRPVVVRAKIREIFMPALSSTMTEGKIVSWAAAEGDRVAKGDAVVVVESDKADMDVETFYDGIVAVVLVPAGESAPVGAPIALLAESEEDVALAVAQAQALSSGQPQQEAPALSDAAASPPPPAAPVAAAPAPVAAGTKGVATPQAKKLAKQHRVDLAKVTGTGQFGRITPADVEAAAGIQPKPKVAPTPAAAAPVAAASSVRAVPQAAVLPPVPGATVVPFTAMQAAVSKNMVESLSVPAFRVGYPILTDKLDALYEKVKPKGVTMTVLLAKAAAMALAQHPVVNASCRDGTSFTYNSSINIAVAVSIDGGLITPVLEQADKLDIYLLSQKWKELVKKARAKQLQPNEYNSGTFTLSNLGMF…

## Sheet: S5
Dataset S5 VR upregulated expression proteins relative to Pavon76
Protein_ID	Gene ID	Protein_Description	Fold change_VR-VS-PR	Ratio_VR-VS-PR	Pvalue_VR-VS-PR	Protein_Sequence
tr|A0A3B6H1H3|A0A3B6H1H3_WHEAT	TraesCS3D02G433100	Protein kinase domain-containing protein OS=Triticum aestivum OX=4565 PE=4 SV=1	1.5854	1.03273909564394|1.66998955711325|0.886574282020474|1.82258647075192|2.74174431136723|1.52255663272884|1.34225064063945|2.19093180578779|1.05923970635224	0.0122623	MVSLLVLAVLVLPPVPATTATVTTARRNCPDTCGYHLIPFPFGVGPSCSLPGFNLTCAVDKQTNDSHPMLGNSMLEVSFPSDVPDSYLFTTSISYTVKMIPGVRDYSIHWEAPARPFAISGWSNISLFVVGCGVRASLFIDNSAVEAGNCSVVCAEAQVMEKLTVGTCDAMVGLGCCFIDIQVNLRAFTLDISRINGSPSSKQVQAYMSDSMDPSFTPIGAYSGFQYSGTVQLDWSIPYQPKLPNCKRAMEDKESYACISNHSKCEDSPIGGYICYCQSGAMEGNAYVYGGCHNPPAYDSIQPRADCPTSCNNVSTPFPFGTELGCFAKPHLYLKCIPTAALPVLQLTDRTLVTDISIGGGVLQIHGILEPDDFMSDSDHPLYALSGEGERRIVKWAID…
tr|A0A3B6LLJ2|A0A3B6LLJ2_WHEAT	TraesCS5B02G236600	Alpha-amylase OS=Triticum aestivum OX=4565 PE=3 SV=1	1.57511	1.77471719889632|1.66983069894644|1.53979428065643|1.53870251682206|1.46629512158077|1.34758588315761|1.70832681290941|1.62347943853892|1.50728039876264	2.37879e-07	MGRQVAALCGLLVVLLRLTSGVNAQTEILFQGFNWDSWSKQGGWYNMLKAQVGDIAGAGVTHVWLPPPTHSVSSQGYMPGRLYDLDASKYGTAVELRSLIAAFGAKGIKCVADIVINHRCAEDKDGRGIYCIFKGGGPEGLLDWGPGMICSDDTKFSDGTGHRDTGADFAAAPDIDHLNPRVQKELSDWLNWLKSDLGFDGWRLDFAKGYSADVARTYVQNTSPGFVVAEIWNSLSYDGDGKPAVNQDGERQELVNWAKAVGGPAMAFDFTTKGILQSAVQGELWRMRDKEGNAPGMIGLLPEKAVTFVDNHDTGSSQKKWPFPADKVMMGYAYILTHPGVPCIFYDHVFDWNLKQEINALAAVRNRNGINAGSKLRILAAESDMYVATVDEKVIVKLG…
tr|A0A3B5Y1W9|A0A3B5Y1W9_WHEAT	TraesCS1A02G253200	Pyruvate, phosphate dikinase OS=Triticum aestivum OX=4565 PE=3 SV=1	1.63951	1.56945744014394|1.51162558817877|1.38214302983154|2.10833006949713|1.77303385886924|1.62303207219458|1.89101598268113|1.5445377058823|1.35241357428064	8.12436e-06	MAPAQCARVQRVFHFGKGKSEGNKAMKDLLGGKGANLAEMASIGLSVPPGFTVSTEACQQYQAAGRALPPGLWEETLEGLRWVEEYMGARLGDPARPLLLSVRSGAAVSMPGMMDTVLNLGLNDEVAAGLAAKSGDRFAYDSYRRFLDMFGNVVMDIPHALFEEKLEAMKATKGVDNDTDLIANDLRELVGQYKNVYVEAKGEQFPSDPKRQLQLAVLAVFDSWDSPRANKYRSINQITGLRGTAVNVQCMVFGNMGNTSGTGVLFTRNPSTGEKKLYGEFLVNAQGEDVVAGIRTPEDLDAMRDHMPEAYAELVENCDILESHYKEMMDIEFTVQENRLWMLQCRSGKRTGTGAVKIAVDMVNEALVDRNTAIKMVEPGHLDQLLHPQFANPEAASYK…
tr|A0A3B6PL02|A0A3B6PL02_WHEAT	TraesCS6B02G256900	Ribosomal_L14e domain-containing protein OS=Triticum aestivum OX=4565 PE=3 SV=1	1.61099	1.41737528593771|1.98067361437385|1.96858618067483|0.958975931285778|1.14967257171019|1.31678332304881|1.71498400439638|2.12725148667438|1.86460646597769	0.00134716	MPFKRFVEIGRVALVNYGKDYGRLVVIVDVVDQNRALVDAPDMVRCQMNFKRLSLTDIKIDIKRIPKKATLIKAMEEADVKTKWENSSWGKKLVVQKRRASLNDFDRFKVMLAKIKRGGAIRQELAKLKEVAA
tr|A0A159KHX4|A0A159KHX4_WHEAT	TraesCS1B02G041928	Omega-secalin OS=Triticum aestivum OX=4565 PE=4 SV=1	3.00188	2.61199003768617|2.95555046745859|2.80887162496036|2.84660088115412|3.23984020119351|3.12657253792938|3.02395939278261|3.41628215187441|2.98725511981712	1.33156e-10	MKTFLIFVLAMTMSIITTARQLNPSEQELQSPQQLVPKEQSYPQQPYPSHQPFPTPQQYSPYQPQQPFPQPQQPTPIQPQQPFTQQPQQAFPQPQQQLPLQPQQSFPQPQQPIPQQPQQSFPQQPQRPSCVTPSYTSSNMRIKERKFLSQGHCW
tr|R9XV82|R9XV82_WHEAT	TraesCS1A02G007405	Gamma-gliadin OS=Triticum aestivum OX=4565 PE=4 SV=1	1.98855	1.60341190778888|2.10888534726327|2.14919361400818|1.76083288262838|2.27480828980748|2.34543504677129|1.6077793467807|2.13042739962882|1.91617898049122	6.20144e-07	MKTLLILTILAMATTIATANMQVDPSGQVQWPQQQPFRQPQQPFYQQPQQTFPQPQQAFPHQPKQQFPQPQQPQQQFPQPQQPQQPFPQPQQAQLPFPQQPQQPFPQPQQPQQPFPQSQQPQQPFPHPQQPQQSFPQQQQPLIQPYLQQQMNPCKNYLLQQCNPVSLVSSLVSMILPRSDCQVMQQQCCQQLAQIPRQLQCAAIHSVVHSIVMQQEQQQGIQILRPLFQLVQGQGIIQPQQPAQYEVIRSLVLRTLPNMCNVYVRPDCSTINAPFASIVAGISGQ
tr|A0A3B5Y1D6|A0A3B5Y1D6_WHEAT	TraesCS1A02G237200	CW-type domain-containing protein OS=Triticum aestivum OX=4565 PE=4 SV=1	1.75953	2.24781655611208|1.78554589206901|1.65706046050884|1.41912143381699|1.14645814619806|1.05844768751271|2.54879580365349|2.04370054624449|1.9288446455751	0.000710696	MDIITENVGGNPSGMPKRKMKISSLQTAPSGKKLKVKAHKQLSNGITRKSHGEDKSVKPEKETVSSGETDNGRSDGVNDGDHKISHLNFDRSAPVPSACMTGAMESSVAVPVEPVLINEQWVCCDKCEKWRLLPYWMNPDILPKKWRCNMQSWLHGMNNCKISEDETTKALRAMPPAPENNISVDVCHDIATSGVCAATIPPTIQGDIKSIATSGTLKVDSSANTSNNLKMGEMSKSSKKLEAPTSRNPDDVDCFPKQKGKRKHIGSSDDGETVAVDRLHPESKSSRVGFDHDSLRASKKMNKEPNEPAKHHPSEFEISKSSPSVKGTPKSLHRYSGVSPSTGKYGSSSLVKCNDDKIISNGGIRTSDVGRSDVPELSIKNRKSKQRQLSKRGPDPIVS…
tr|A0A3B6AXC2|A0A3B6AXC2_WHEAT	TraesCS2A02G214700	Histone H2A OS=Triticum aestivum OX=4565 PE=3 SV=1	2.26652	2.56334048402516|2.84002289761399|2.50678508953864|1.65008275056153|1.84031416965525|1.62427335575635|2.39246292288002|2.67567172309813|2.30569978208157	3.3401e-06	MAGRGKAIGTGAAKKATSRSSKAGLQFPVGRIARFLKAGKYAERVGAGAPVYLAAVLEYLAAEVLELAGNAARDNKKTRIVPRHIQLAVRNDEELTKLLGGATIASGGVMPNIHQHLLPKKASSSKASTVDDDDN
tr|A0A077RP15|A0A077RP15_WHEAT	TraesCSU02G044500	Sucrose-phosphate synthase OS=Triticum aestivum OX=4565 GN=TRAES_3BF045200020CFD_c1 PE=3 SV=1	1.52856	2.09727611548487|1.49498233174121|1.40505775172426|1.60641523663527|1.16634644909314|1.08984170204352|2.03115592165994|1.46148976531074|1.40444401813103	0.00056167	MVGNDWINSYLEAILDAGGAAGDITAASVASAAPGGGAGSAAAEKRRDKASLMLRERGRFNPARYFVEEVISGFDETDLYKTWVRTSAMRSPQERNTRLENMSWRIWNLARKKKQIEGEEASRSSKKRLEREKARRDAAADLSEDLSDGEKGEHINESSIHAESTRGHMPRIGSTDAIDVWANQHKDKKLYIVLISIHGLIRGENMELGRDSDTGGQVKYVVELARALGETPGVYRVDLLTRQISAPDVDWSYGEPTEMLSPRNSENLGDDMGESSGAYIVRIPFGPREKYIPKEQLWPHIQEFVDGALVHIMQMSKVLGEQVGNGQPVWPVVIHGHYADAGDSAALLSGALNVPMVFTGHSLGRDKLEQLLKQGRQTRDEIDATYKIMRRIEAEELCL…
tr|A0A3B6AYW6|A0A3B6AYW6_WHEAT	TraesCS2A02G303400	GrpE protein homolog OS=Triticum aestivum OX=4565 PE=3 SV=1	1.59626	1.46403918690588|1.71186228593703|1.72871107215223|1.33957971423476|1.55967692204864|1.58640341341595|1.49965281698777|1.77143547680575|1.70501599341035	3.87954e-07	MAATYCAYPAAAAAAAANPTRRRLQTLTAPGALPAARKPSRQPPTFLSFRLPNAALPPLRVAGADPQVVNGEDFPPMNDLIRLYKKAFLDGNEDVVSDIEKAITSMEEERSKSASQFESITAEIASGKNKFLRLNADLENFRKQTEKDRAKFTSNIQVELVQSLLPLVDSFEKTNVEITLETEKEQKISASYQGIYKQLVETLKNLGVGVVETVGKPFDPVVHEAIAREESTEFKAGIVSHEVHRGFLLRERVLRPAAVKVSNGPGDQNVSSTSSEEPVEDTKEDAAV
tr|A0A3B6QB45|A0A3B6QB45_WHEAT	TraesCS6D02G090400	Uncharacterized protein OS=Triticum aestivum OX=4565 PE=3 SV=1	1.59003	1.95192033349923|1.64858278224445|1.48206503497407|1.69686932940966|1.42529749170144|1.28678864207439|1.856428938756|1.58270164643829|1.37964461287553	9.26961e-06	MMGGRAVLLLLVISALFAQIHASDPLFHESFNESFDGSWIVSGKEEYKGVWKHAKSDGHEDYGLLVSEPARKYAIIKELDYLVTLKGETVVLQFEVRLQNGLECGGAYIKYIRPQATGWNAKDFDNDTPYTIMFGPDKCGSTNKVHFILKHKNPKTGKYVEHHIKSPPSVPYDKLSHVYTAILKPDNEVRILVDGVEKSKANFLSADDFEPALVPSKTIPDPDDKKPEDWDERAKIPDPVAVKPDDWDEDAPMEIVDEEATKPEGWLDDDPEEIDDPEAAKPEDWDDEEDGEWEAPKMDNPKCEVAPGCGEWKKPMKDNPAYKGKWHAPLIDNPNYKGIWKPQEIPNPEYFELDKPDFDPIAAIGIEIWTMQDGILFDNILIADNEKVATSVREKTWKP…
tr|W5A761|W5A761_WHEAT	TraesCS1D02G260000	Uncharacterized protein OS=Triticum aestivum OX=4565 PE=4 SV=1	1.6016	1.54202220178708|1.72715297312003|1.62390179387113|1.39344601663177|1.64153141314501|1.44656424469217|1.60239885488617|1.81852841861241|1.61889152234856	1.3814e-07	MESSEPLQDIMCEFRAGKMSLEGTRVVPDTRKGLVRIGKGEEGLIHFQWLDRGQNIVEDDQIVFPDEAVFEKVTESSGRVYILKFRHDSRKFFLWMQETNADGDSQICRQVNAYINRPLDGDAISIEAEMSHEDTADDDISSRAGNLVDQSMTADMAGEVTSAAGPVRLADLQRILSSIQPSDATADPDAGLRLGDILKPDLILPLIETLPIEQLASHLPEGSWTAGDILELLQSPPLRQQLDAFTHVLQTGQIDLAQFGVDPSKYKFTVASFLEALEDSVAKASTDGGNDSKAKKDGGNDPMDES
tr|A0A3B6C7G7|A0A3B6C7G7_WHEAT	TraesCS2B02G320000	GrpE protein homolog OS=Triticum aestivum OX=4565 PE=3 SV=1	1.78661	1.48153776349688|1.75125954516806|1.7890179059626|1.58083451727086|1.81582058318844|1.8675465173169|1.82142728539016|2.12157850749673|1.85044922276973	1.52721e-07	MAATYCAYPAASAAAANPTRRHLQTLTAPGALPAARKPSRQAPTFLSFRRPNAALRPLRVAGADPQIVNGEDFPPMNDLIRLYKKAFLDGNDDVVSDIEKAITSMEEERSKAASQLESITAEIASGKNKFLRLNADLENFRKQAEKDRAKFTSNIQVELVQNLLPLVDSFEKTNVEVTLETEKEQKISTSYQGIYKQLVETLKSLGVGVVETVGKPFDPVVHEAIAREESTEFKAGIVSHEVHRGFLLRERVLRPAAVKVSTGPGDQIAGATSSEEPVEDTKEDAAV
tr|A0A3B6H2U9|A0A3B6H2U9_WHEAT	TraesCS3D02G524800	Small nuclear ribonucleoprotein Sm D2 OS=Triticum aestivum OX=4565 PE=3 SV=1	1.54439	1.22366785311685|1.79708038389605|1.75124811557093|1.07341049836768|1.58548390592103|1.54585164477333|1.26903131955916|1.87786564357885|1.77582614934825	0.000241162	MAEEAAANVKEEEEFSTGPLSLLLMSVKNNTQVLINCRNNKKLLGRVRAFDRHCNMVLENVREMWTEVPKTGKGKKKALPVNKDRFISKMFLRGDSVIIVLRNPK
tr|A0A3B5YQY0|A0A3B5YQY0_WHEAT	TraesCS1B02G043800	Subtilisin-chymotrypsin inhibitor-2A OS=Triticum aestivum OX=4565 PE=3 SV=1	3.98938	5.48117587645126|4.89952347886583|5.14640386434864|4.92531913076741|2.76021303336778|2.85118124967037|4.72936589117324|2.52372487186948|2.5875491527655	2.27972e-06	MSSMEGSVMKYPEPARGSTEASSAKTSWPEVVGMSAKKAKEIILRDKPDAQIEVIPVDVQVTQDLNLNRVRIVVAVARTPMVG
tr|L7R666|L7R666_WHEAT	TraesCS1D02G001100	Gamma-gliadin OS=Triticum aestivum OX=4565 PE=4 SV=1	1.71016	1.64207606904114|1.88605883834053|1.79730756654578|1.69648834931035|1.94026447052858|1.85609119140407|1.42001488144738|1.64503252605596|1.5081046185457	3.47151e-07	MKTFLILTILAMATTIATANMQVGSSGQVEWPQHQQLPQPQQPLYHQPQQIFPQPRQTFPHLPQQTFPQPQQTIPHQPQQQFPQTQQPLQPFPQPQQTFPQQPQQPLPQPQQPQQPFPQSQQPQQPFPQPQQQFPQPQQPQQSIPQQQQPLIRSSLQQQMNPCKNFLLQQCNPVSLVSSLVSLIFPRSDCQVMQLQCCQQLAQIPQQLQCAAIHSVVHSIMMQQEQQQPQQLAHLEVIRSLVLKTLQTVCNVYVRPDCSTIRTPFASTVAGIGGQ
tr|A0A3B6AYJ7|A0A3B6AYJ7_WHEAT	TraesCS2A02G243500	Small nuclear ribonucleoprotein-associated protein OS=Triticum aestivum OX=4565 PE=3 SV=1	1.91437	1.93376579714836|2.05354221020085|2.16792051075859|1.37616461413748|1.6779456597407|1.60668331531276|1.9948050514616|2.29097726809551|2.12755015537364	2.96587e-06	MSNPKGSKMLQFVNYRMRVTIQDGRQLVGKFMAFDRHMNLVLGDCEEFRKLPPSKSSKTTGEREERRTLGLLLLRGEEVVSMTVEGPPPPDESRAKASGGGGALSGTGVGRAAGRGVATGPLLQAQPGLSGPVRGVGGPAPGMMQPQISRPPMPNLSAPPVAYPQVVRPPPMGMPPMRPGGPPPMQMQFQRPPGPPPAPYPGGPPQQFMRGPPPMGPPPGRPGMPGMPPPPGMRPMPPLQFGQPPRHGMPPPPPGPQQPGQNPQQ
tr|A0A077RXS4|A0A077RXS4_WHEAT	TraesCS3B02G457100	AAA domain-containing protein OS=Triticum aestivum OX=4565 GN=TRAES_3BF045700010CFD_c1 PE=3 SV=1	2.17914	2.18330619879095|2.56100300742582|2.33425377693572|1.86015547098769|2.16390516583858|1.98495173254726|2.05069773576897|2.41398704364384|2.05999347225888	1.36414e-08	MSSSPTPAPDAGAAAMAVDDSSETDQLDSMSTEDIVRATRLLDNEVRVLKDELQRNNLELENVKDKIKENQEKIKLNKQLPYLVGNIVEILEMNPEDEAEEDGANIDLDSQRKGKCVVLKTSTRQTIFLPVIGLVDPDNLKPGDLVGVNKDSYLILDTLPSEYDSRVKAMEVDEKPTEDYNDIGGLEKEIQELVEAIVLPMTHKEQFQKLGIRPPKGVLLYGPPGTGKTLMARACAAQTNATFLKLAGPQLVQMFIGDGAKLVRDAFELAKEKAPCIIFIDEIDAIGTKRFDSEVSGDREVQRTMLELLNQLDGFSSDERIKVIAATNRADILDPALLRSGRLDRKIEFPHPTEEARARILQIHSRKMNVHPDVNFEELARSTDDFNGAQLKAVCVEAG…
tr|A0A3B6HTC5|A0A3B6HTC5_WHEAT	TraesCS4A02G071300	VWFA domain-containing protein OS=Triticum aestivum OX=4565 PE=3 SV=1	1.67449	1.56261558907843|1.82878161463729|1.91820831705852|1.34273799095243|1.57311517384556|1.64167092437992|1.63140073774548|1.7829525312925|1.788968124132	5.8346e-07	MVLESTMICIDNSEWMRNGDYSPSRFQAQADAVNLICGAKTQSNPENTVGVMTMAGKGVRVLVTPTSDLGKILACMHGLEVGAEANLAAAIQVAQLALKHRQNKRQQQRIIVFIGSPVTYDKKVLETIGKKLKKNNVALDVVDFGETDDEKPEKLEALIAAVNSSDSSHIVHVPPGDHALSDVLISTPIFTGEEGGSGFAASAAAAAATGATGYDFGVDPNVDPELALALRLSMEEERARQEAIAKKAAEDNKDQPSSSTDAIMAEAELTLNAPADVDADLLKDDDDAQLLQQALAMSMDEGASGAAAVADAAMAEAAADDQDLALALQMSVQDAEAAGQSDMSKVFEDRSFVTSILNSLPGVDPNDPSVKDLLASLHGQGEEEKKDKEDKPDISEDGKN
tr|A0A3B6KHF8|A0A3B6KHF8_WHEAT	TraesCS5A02G163600	Uncharacterized protein OS=Triticum aestivum OX=4565 PE=4 SV=1	1.58919	1.83788250807737|2.59643591015351|2.78601746217047|1.0418696037948|1.33055746020415|1.49960171407548|0.874738639668272|1.24741268899938|1.08816426574708	0.0202322	MVHLPHMGKLRRGLKEEAVDDDGDAAGAAGAEASPFHKRSRLAHQQQPPQQWSTGGASVSNQQSSQHDFLEEPSPLGLRLKKSPSLVDLIQMKLVQAGKAKDARHGGTASASEKLKASNFPGSILRIGSWEWVSRHEGDLVVKCYFAKHKLVWEVLDGGLKSKIEIQWSDICALKVVCPETEPGTLEIALSRQPLFFRETNPQPRKHTLWQATSDFTAGQASMHRRHFLQCAPGMMNKHVEKLVHCDPRLCSLSQQNEITLENPYFESRSSIFEDPDDVKCQNFVHNKDDDDQLTPQRFRELLQHHSASGRIDAEERQEAGTSDGLPQGFSNSVADSQVIKQDDGSSVGEPHTNILSWNGFKLPGIRRSMSKSEIANHIGHHIYRHMYSGNLPAADGGA…
tr|A0A3B6I0E9|A0A3B6I0E9_WHEAT	TraesCS4A02G329600	PCI domain-containing protein OS=Triticum aestivum OX=4565 PE=3 SV=1	1.69487	1.77191771631702|2.04326210747913|1.99205429669507|1.32904781633206|1.52091690833598|1.48376051850919|1.58373234330555|1.83789246197349|1.69123763474062	4.34195e-06	MGGSSSLDAAIESLLNTEKQCRLAGDVAGTRKAAVDIVELCFKDAAWKTLNDQIVVLSKRRGQLKQAITAVVQKAMEYIDVTPDVETRIELIKTLSSVAAGKIYVEIERARLIKRLAKIKEEQGKIDEAAEIMQEVAVETFGSMAKTEKLAFILEQVRLCLDRQDYVRAQILSRKISPRVFDADTSKDKKKPKEGDNMVQEAPADVPSLLELKRIYYELMIRYYSHNNDYLEICRCYKSIYEIPSIKEDPAKWTPILRKICWFLVLAPHDPMQSSLLNATLEDKNLSEIPNFRLLLKQVVTMEVIQWTKLWEFFKDEYENEKNLLGGALGTKAAEDLKLRIIEHNILVVSKYYSRITLKRLADLLCLSLQEAEKHISDMVNSKALIAKIDRPMGIVSFR…
tr|A0A3B6C6R8|A0A3B6C6R8_WHEAT	TraesCS2D02G285200	Uncharacterized protein OS=Triticum aestivum OX=4565 PE=4 SV=1	1.66318	1.74253754264107|1.55471373429517|1.53235297802086|1.3677516027044|1.23324667441127|1.20838221214986|2.29425606552842|2.04488025544723|1.99047921539551	0.000213281	MATADGQSQPAATEPSPSPAKRKTDTDSEVSPLDPPAKAARPGADEEAAAEAKARVADKGKGKMVVDEEEEGDEESDEEEDDEEVEGDGDESDGLCEDPLSEVDLNNILPSRTRRCAPAQPGAYLVPPEEAAEDDEDDEDADVDMAPGEESGDGEESD
tr|A0A3B6B702|A0A3B6B702_WHEAT	TraesCS2A02G504000	UDPGT domain-containing protein OS=Triticum aestivum OX=4565 PE=3 SV=1	8.11977	6.94825105376623|9.09183968512306|7.27098615468451|10|10|10|6.55967563845604|8.66424612829461|4.54290984007435	1.1654e-08	MPQIVQDRASRTCAVRMGQYGRKPEARGLLINTYERLEARAVTALREGACVPGRPTPPVYCIGPLIVKGEAAAQAQGACLSWLDEQPERSVVFLCFGSLGAMSAAQLKEIARGLENSGHRFLWVVRSPPEDPAKYFLPRPEPDLDALLPDGYLKRTQGRGLVVKMWAPQVEVLGHAATGAFVTHCGWNSVLEAASAGVPMLCWPQYAEQRANKVFVVDEMKLGVVMEGYDEELVKAEEVEKKVRLVMESDEGGKLRGRLALAKEKAAEALADGGPSRTAFAEFLKDL
tr|A0A3B6GMX4|A0A3B6GMX4_WHEAT	TraesCS3D02G124600	Ubiquitin carboxyl-terminal hydrolase OS=Triticum aestivum OX=4565 PE=3 SV=1	1.50946	1.55215129434694|1.50778328639929|1.45593861891513|1.38420428502685|1.29789314353979|1.27474944783933|1.80917489693941|1.77401578259538|1.52925052677203	8.89048e-06	MDLLRANLHKVRIPEPTNRIHKDECCVSFDTPRSEGGLYVDMNSFLGFGREHVAWNFEKSENPVYLHIVQRRKPEPDETDRPLKKPTLLAIGVEGGFGEQEPEYDVTYEIVILPEFVSLPFPSVDLPEKVRLAVDKVILAESADRKQQLASWVADKKIISAHAMDLQQLDNGVIVPPTGWKCSKCDKTENLWLNLTDGMILCGRWVWDGTGGNNHAVEHYQQTKYPLAVKLGTITADLEGADVYSYPEDDSVEDPILAQHLSHFGIDFSSLQKTEMTTAERELDHNTNFDWNRIQESGKDAEPLYGPGYTGLVNLGNSCYMASVMQVMFSTHPFISRYFEKQSLKAVFAISQADPTLDLNMQMTKLAHGMLSGKYSAPSQEQRAGYSLVKWVELPRDKY…
tr|A0A3B5XWM4|A0A3B5XWM4_WHEAT	TraesCS1A02G110300	Uncharacterized protein OS=Triticum aestivum OX=4565 PE=3 SV=1	1.50084	1.50745819144121|1.51151221780048|1.51393095639797|1.34936619982136|1.3587945375705|1.35893244868082|1.61054876507538|1.70295722499432|1.59403181041049	5.04513e-07	MGSLRXXSGGEGRNEDGGKVGLPALEVALAFPQATPASLFPPAVSDYYQLDDLLTGEEKALRKKVRAISEKEIAPIMTEYWEKAEFPFHAIPKLATLGLAGSTTKGYGCPGLSLTASAVSIAEVARVDASCSTFILVHSSLAMSTIALCGSEAQKQKYLPSLAQFKTVGCWALTEPDYGSDASSLKTSAIKVPGGWQLDGQKRWIGNSTFADVLVILARNADTKQLNGFIVKKGAPGLRATKIQNKIGLRMVQNGDILLNKVFVPEEDRLTGINSFQDISKVLAMSRIMVAWQPIGISMGVYDMCHRYLKERKQFGAPLAAFQLNQEKLVRMLGNIQAMLLVGWRLCKLYESGKMTPGHASLGKAWTSSKSREVVSLGRELLGGNGILADFLVAKAFCD…
tr|A0A159KIB1|A0A159KIB1_WHEAT	TraesCS1B02G041928	Omega-secalin OS=Triticum aestivum OX=4565 PE=4 SV=1	5.4663	5.66505077921061|5.95650919588704|5.54775535707828|4.80332130553404|5.03317449698825|6.31722564871408|4.98460725293379|6.63351533207522|4.25552832523636	4.14863e-10	MKTFLIFVLAMTMSIITTARQLNPSKQELQSPQQPVPKEQSYPQQPHPSHQPFPTPQQYSPYQPQQPFPQPQQPTPIQPQQPFPQQPQQPFPQPQQQLPLQPQQPFPQPQQPIPQQPQQSFPQQPQRPEQQFPQQPQQIIPQQTQQPFPLQPQQPFPQQPQRPFAQQPEQIISQQQFPLQPQQPFSQPQQPFPQQPGQIIPQQSQQPSPLQPQQPFSQQPQRPQQPFPQQPQQIIPQQPQQPFPLQPQQPVPQQPQRPFGQQPEQIISQRPQQSFPL
tr|A0A3B6FLV0|A0A3B6FLV0_WHEAT	TraesCS3B02G219800	PCI domain-containing protein OS=Triticum aestivum OX=4565 PE=4 SV=1	1.89497	1.98702763470247|2.19288911932051|1.93042486026229|1.80656216385518|1.98231672230655|1.75058616531197|1.77923105466707|1.97900054749595|1.64673468792092	1.90264e-08	MGSDADMEDYGFEYSDDEPEEQDVDIENQYYNSKGMVETDPEGALAGFDAVVRMEPEKAEWGFKALKQTVKLYYKLGKYKEMMDAYREMLTYVKSAVTRNYSEKCINNIMDFVSGSASQHFNLLQEFYQTTLKALEEAKNERLWFKTNLKLCKIWFDMGEYGRMSKILKELHKSCQKEDGSDDQKKGTQLLEVYAIEIQMYTETKNNKKLKELYQRALSIKSAIPHPRIMGIIRECGGKMHMAERQWADAATDFFEAFKNYDEAGNPRRIQCLKYLVLANMLMESEVNPFDGQEAKPYKNDPEILAMTNLIAAYQKNDIMEFEKILKSNRRTIMDDPFIRNYIEDLLKNIRTQVLLKLIKPYTRIRIPFISQELNVPEKDVEQLLVSLILDNRVQGHID…
tr|A0A3B6C5U5|A0A3B6C5U5_WHEAT	TraesCS2B02G285600	PCI domain-containing protein OS=Triticum aestivum OX=4565 PE=3 SV=1	1.66502	1.61170417262695|2.16741811209009|1.88185739613139|1.34094926020714|1.80201248254867|1.63438245963653|1.2388622858374|1.7058813286793|1.60212353952865	2.08674e-05	MSAMQSSYLPATTESIAMAQEAKDASESILILYRVLEDPSSSSDAVRTKEVAITNLTNYLTKENRAQELRNLLTQLRPFFALIPKAKTAKIVRGIIDAVSKIPGTSDLQISLCKEMVEWTRAEKRTFLRQRVEARLAALLLESQEYTEALTLLSGLIKEVRRLDDKLLLVDIDLLESKLHFSLRNLPKAKASLTAARTAANAIYVPPAQQGTIDLQSGILHAEEKDYKTAYSYFFEAFEGFNALDDPKAIFCLKYMLLCKIMVNQADDVAGVISSKAGLKYVGPDVDAMKAVADAYSKRSLKYFETALGDYKAQLEEDPIVHRHLSSLYDTLLEQNLCRLIEAYSRVEIAHVAEMIELPIEHVEKKLSQMILDKKFAGTLDQGAGCLIIFEDAKTEAIF…
tr|A0A3B6SL27|A0A3B6SL27_WHEAT	TraesCS7B02G324000	Ribosomal_L28e domain-containing protein OS=Triticum aestivum OX=4565 PE=3 SV=1	1.59634	1.54210119501157|1.53750391785871|1.55557546190893|1.37951450378082|1.37807604510427|1.39618329862874|1.86444422561438|1.87639737794201|1.83722214314735	5.17367e-06	MTTVRGFVVWELVKKNNCFLIKQFRNSNAKLRFSKESNNLYNVNSYKFSSLANSKTVAVQPSAGEDKAVVRSTTKTKKQNTPAKLQHKTLMRKEFRKMAKSVKN
tr|H6BHN3|H6BHN3_WHEAT	TraesCS3D02G440400	Putative non-tir-NBS-LRR resistance gene analog (Fragment) OS=Triticum aestivum OX=4565 PE=4 SV=1	1.86946	2.32506938991267|2.08032804184552|1.79487855406359|1.81812824737191|1.6515997198928|1.41935392286958|2.13050953875927|1.92457196095953|1.68068207660991	1.79879e-06	GMGGLGKTTLVTNVYEREKVNFQTSAWMVVSQTYTLDALLRKLLEKVTEQPSSPNIDRMDVHDLKKEIKRKLKDRKCLIVLDDVWNKEVYSQMRDAFQNSDASRIIITTRNNHVASVAHLTRRIDLKPLGNAHAFELFCRRVFYIKEDHEYECPSHLMKTARSIVDGCQGLPLALKV
tr|A0A3B5ZNL1|A0A3B5ZNL1_WHEAT	TraesCS1D02G036900	Uncharacterized protein OS=Triticum aestivum OX=4565 PE=4 SV=1	1.54124	1.33127664111967|1.58618862099243|1.91155263587878|1.28396174857016|1.54022083525428|1.85555394623999|1.20755928813981|1.45233580003603|1.7025114379896	5.09708e-05	MHANKSLVAAIASLRATHITSKRIQQAMASSSSSPLLMLLLLPLLLAMARPCSAVDAIGTYCAKNGTSAETQASIDQVLAALVPRASAAYYATATAGRSSSAVWGLAQCRGDVPRQDCSLCLAAAAKEVASSCRGSSDGRVFYDYCLLRYSTSNFVGLADTGYTLILLNTQNATGVDLAAFDRAQGKLMSRVASEAGDAANKGLATDTTRLGSEGGGAKTTIYGLGWCTRDITAADCGLCVAQAVAELPNYCRYRRGCRVIYSSCMARYEVYPFFFPLDGADESADELGQCDKIVLNYP
tr|A0A3B6GPH9|A0A3B6GPH9_WHEAT	TraesCS3D02G025700	BOWMAN_BIRK domain-containing protein OS=Triticum aestivum OX=4565 PE=3 SV=1	2.25506	2.2661282953382|2.30916842282038|2.31387698603239|2.15461003723141|2.22022389033781|1.92205516092975|2.33347045465027|2.3974397921274|2.378591928669	3.99671e-10	MGMKRCVVVASILLMLALLVAGDEVGAILLPSEAKAEGLQLQTKQPWPWRRPRGRGSAATGPCAPGRSRRSAPACMDEFFECPSTCKACRPSIHGPSRHVCQDQYVGDPGPICRPWECCDLPSCTRSYPPTCRCMDEVDKCAPTCKSCLPSRSRPSRRVCIDSYFGPFPPACTPKVVAAGGN
tr|A0A3B6FHK1|A0A3B6FHK1_WHEAT	TraesCS3B02G025200	Fructose-bisphosphate aldolase OS=Triticum aestivum OX=4565 PE=3 SV=1	1.50986	1.72285563711245|1.3665384385851|1.43810726451156|1.5499989809854|1.23807371445968|1.30152769920905|1.8863428077549|1.51028495985423|1.57503350427733	1.73976e-05	MVTAKLSSPAAARLAPSAGSARRASRVRVRASGGSYADELVSTAKTVASPGRGILAIDESSATCGKRLASIGLDNTEVNRQAYRQLLLTTAGLGEYISGAILFEETLYQSTTDGKTFVDVLKDQNIMPGIKVDKGLVPLPGSNNESWCQGLDGLASRCAEYYKQGARFAKWRTVVSIPCGPTALAVKEAAWGLARYAAIAQDNGLVPIVEPEILLDGDHGIERTLEVAEKVWSEVFFYLAENNVLFEGILLKPSMVTPGAEHKEKASPEAIAKNTLTMLRRRVPPAVPGIMFLSGGQSELEATMNLNAMNQSANPWHVSFSYARALQNSVLKTWQGQPENIEAAQKALLVRAKANSLAQLGSYTGEGESDEAKKGMFQKGYTY
tr|A0A3B6SH12|A0A3B6SH12_WHEAT	TraesCS7B02G128800	AB hydrolase-1 domain-containing protein OS=Triticum aestivum OX=4565 PE=4 SV=1	2.90951	2.57351496515418|3.59302133926688|3.3384569309596|2.34855251642476|3.04867373895685|2.86403290858256|2.47201599863731|3.49176250907274|2.45557560210814	5.24907e-08	MASDGVITHRSVEVNGVRLHVAEAGPAGAPVVLLLHGFPELWYTWRHQMPALAAAGYRAVAPDMPGYGDSEAPSAGPDQYTALHIVGDLVALIDSLGQERVFVVGHDWGAIIAWSLCLFRPDRVKALVALSVPFIPRSPAVKPVDAVRALYGDDFYICSFQEPGAIEAEFKRLGTELVLRKFFADRTPGPLFIQKSGWGSPDDEVPLPSWITEEDLKYYTTQFDKSGFTGGFNYYRALNKTWELTSPWTGAEIMVPTKFTVGNLDLTYNIAGAKVFINKGGLKKFVPLLDDVVIMKDVGHFINEEKPEEISALIIGFIKKFN
tr|A0A3B6ASP4|A0A3B6ASP4_WHEAT	TraesCS2A02G090000	AAA domain-containing protein OS=Triticum aestivum OX=4565 PE=3 SV=1	1.62367	1.43028298448433|1.82357745300156|1.69247582720375|1.35896697364069|1.71622698035013|1.60857511348741|1.48334682626203|1.90927650608698|1.59030975219907	1.30013e-06	MGQGTPGGMGKQGGAPGDRGKPGGDGDKKDKKFEPPAAPSRVGRKQRRQKGPEAAARLPGVAPLSKCRLRLLKLDRVKDYLLMEEEFVAAQERLRPTEEKTEEDRSKVDDLRGTPMSVGSLEEIIDESHAIVSSSVGPEYYVSILSFVDKDQLEPGCSILMHNKVLSVVGILQDEVDPMVSVMKVEKAPLESYADIGGLDAQIQEIKEAVELPLTHPELYEDIGIRPPKGVILYGEPGTGKTLLAKAVANSTSATFLRVVGSELIQKYLGDGPKLVRELFRVADELSPSIVFIDEIDAVGTKRYDAHSGGEREIQRTMLELLNQLDGFDSRGDVKVILATNRIESLDPALLRPGRIDRKIEFPLPDIKTRRRIFQIHTAKMTLSDDVNLEEFVMTKDEF…
tr|A0A077RTW4|A0A077RTW4_WHEAT	TraesCS3B02G294200	Serine/threonine-protein phosphatase OS=Triticum aestivum OX=4565 GN=TRAES_3BF011700090CFD_c1 PE=3 SV=1	1.55093	1.45746939307787|1.70121639234504|1.86053529434392|1.12458569967247|1.3239026142392|1.44592196293034|1.46373783084069|1.72462817992942|1.85636531678614	6.0588e-05	MDLDLWISKVKEGQHLAEHELQTLCEYVKEILIEESNVQPVNSPVTVCGDIHGQFHDLMKLFATGGHVPETNYIFMGDFVDRGFNSLEVFTILLLLKARYPAHITLLRGNHESRQLTQVYGFYDECQRKYGNANAWRYCTDVFDYLTLSAIINGTVLCVHGGLSPDVRTVDQIRTIDRNCEIPHEGPFCDLMWSDPEEIETWAVSPRGAGWLFGSRVTTEFNHVNNLDLVCRAHQLVQEGLKYMFQDKGLVTVWSAPNYCYRCGNVASILSFDENMDRDVKFFTETEENNQMRGPRTAVPYFL
tr|A0A3B6BZH1|A0A3B6BZH1_WHEAT	TraesCS2A02G086400	AAA domain-containing protein OS=Triticum aestivum OX=4565 PE=3 SV=1	2.19767	2.10385391241494|2.4852655732979|2.77984143792339|1.66289986394649|1.97959296280581|2.19953798477351|1.88964045042185|2.25137447920659|2.42704226934955	3.85904e-07	MSAAAVAPSPAAPLPSAPPPSYPAAPPAPSAEDDDDLYGRLKSLQRHMEFVEIQEEYVKDEQKNLKRELLRAQEEVKRIQSVPLVIGQFMEMVDGNNGIVGSTTGSNYYVRILSTINRELLKPSASVALHRHSNALVDVLPPEADSSISLLASSEKPNVLYSDIGGCDIQKQEIREAVELPLTHHELYKQIGIDPPRGVLLYGPPGTGKTMLAKAVAHHTTAAFIRVVGSEFVQKYLGEGPRMVRDVFRLAKENAPAIIFIDEVDAIATARFDAQTGADREVQRILMELLNQMDGFDQTVNVKVIMATNRADTLDPALLRPGRLDRKIEFPLPDRRQKRLVFQVCTAKMNLSDEVDLEDYVSRPDKISAADITAICQEAGMHAVRKNRYVILPKDFEKG…
tr|A0A3B6A134|A0A3B6A134_WHEAT	TraesCS1D02G395700	Uncharacterized protein OS=Triticum aestivum OX=4565 PE=4 SV=1	1.74933	1.78655390635832|2.08466747705099|1.6892486638155|1.47038917990267|1.69211107512491|1.38417880875703|1.83441462047473|2.16067892299089|1.64176528411124	3.24616e-06	MDPAAEMDTGELDALLRAAADFASYPGTHGEDTVRQFLEQFPLPKLLGVLQSQADLPETVETVAACLDKVFSSRYGASLLPSYGEFIQAGLLTNSNSIKQLACKAVVHLLDKAGDIAVAVDTFVQHNLYPLLINCLVEGDEEISAIVLDAIKRLAEIPTGTDIIFPPDGQGLQLNKVAAQSSSMARIRILSLIAKLFGASSCTATAIRDSNLLSLFEDEIKDRKDMLKTLSALEVLYELAEHPHSNMFLLKTSLLQHITDVINDPSADSIVRSRASLISGRLLSSADAFMTIEKSCVTNLLLAIDKILRTEESQNTDEIESALETLGLIGTTTQGACLLLSDPPNIARHVVEMSFDRQGRGKHLAALHALGSICGVDRQEDQMKLDDPQAEEFLKRLVY…
tr|W5ASA4|W5ASA4_WHEAT	TraesCS2A02G245900	Genome assembly, chromosome: II OS=Triticum aestivum OX=4565 GN=CAMPLR22A2D_LOCUS2419 PE=3 SV=1	1.72464	1.61308777924758|1.6608374596491|1.49498780037897|1.2594761781192|1.30628500233756|1.17523000948927|2.37455962570535|2.4578748048692|2.17942507275041	0.000579275	MADVDVDTEVAAGAQPKKRTFRKFSYRGVDLDALLDMSTDDLVQMFPARARRRFKRGLKRKPMALVKKLRKAKKDAPAGEKPEPVRTHLRNMIIVPEMIGSLIGVYNGKTFNQVEIKPEMIGHYLAEFSISYKPVKHGRPGIGATHSSRFIPLK
tr|A0A3B5Z1W3|A0A3B5Z1W3_WHEAT	TraesCS1B02G314100	Na_H_Exchanger domain-containing protein OS=Triticum aestivum OX=4565 PE=4 SV=1	1.97311	2.83461844148364|2.25989402018467|2.33389508392477|2.08525581022738|1.66654576732416|1.72247490294468|1.85653862462014|1.49392542296214|1.50483689516544	1.73656e-05	MTDTLPGGGDVTAPMEQAAAAVGVTGSGAAAAAVVCYSPMKVTTYGIWEGVNPLEFSLPIFILQTAVIVGTTRLLVLLLKPFRQPRVIAEILAGVILGPSVMGQVGTWAGTVFPGRSLLTLETVAHLGLLYFLFLVGLEMDVNVIKRSGKKAVIIAVAGMALPFCIGTATSFIFRHQVSKNVHQASFLLFLGVALSVTAFPVLARILAEIKLLNSELGKIAMSAAIVNDMCAWILLALAIAISDVNSTPFSSLYVLLSGVAFVLACFYVVRPVMWWIVRRIPEGETISDVQVTLILTGVMISGVCTDAIGIHSVFGAFVYGLVIPSGELGVVLIEKLEDFVMGLLLPLFFAISGLRTNVTRVSDPVTAGLLVLVFVMASFAKIMGTILIAISYTMTFRD…
tr|A0A3B6N3B9|A0A3B6N3B9_WHEAT	TraesCS5D02G568300	Importin N-terminal domain-containing protein OS=Triticum aestivum OX=4565 PE=3 SV=1	1.7055	1.48082105741674|1.93104074003913|1.84161616415935|1.43853266315946|2.09069204563418|1.79582931299971|1.33133910180226|1.92246227533696|1.51712517036823	9.48065e-06	MWLQVVHILQNSQNLNTKFFALQVLESVIKYRWNALPVEQRDGIKNYISDVIVQLSSNEVSFRQERLYVNKLNIILVQVLKHEWPARWTSFIPDLVAAAKSSETICENCMAILKLLSEEIFDFSRGEMTQQKIKELKSSLNSEFRLIHELCLYVLSATQSSELIRATLATLHAFLSWIPVGFIFESPLLETLLKFFPMAAYRNLTLQCLTEVAALQFGDFYNVQYVKMYTFFMLQLQAILPPGTIPNAYANGSNEEQAFIQNLALFFTAFFKNHIRILEASAENRAALLVGLEYLIGISYVDDTEVFKAQMIPGVDGTGTAVHQRRQLYASPLSKLRMLMICRMAKPEEVLIVEDENGNIVRETMKDNDVLVQYKIMRETLIYLSHLDHEDTEQQMLKK…
tr|A0A3B6NMR2|A0A3B6NMR2_WHEAT	TraesCS6A02G116500	26S proteasome non-ATPase regulatory subunit 2 homolog OS=Triticum aestivum OX=4565 PE=3 SV=1	2.01561	2.0265076496284|2.33363133977068|2.25413397928536|1.63159455463872|1.84536152912454|1.78947754455663|1.99415309891166|2.31001400264252|1.95560983440364	1.44315e-07	MSPPENPNGGAAAAAPSEPAPPAKPSSSKGKKKDDKKDDDLSEEDLALKEQLELYVVRAQDVDPGVQRLALESMRQEIRSATSSMTSVPKPLKFLRPHYGTLKSYYETMPESELKKYMADILSVLALTMSAEGERESLRYRLLGSEGDIGSWGHEYVRNLAGEIAQEFQKRQGDDMPIDELMELVQQIVSFHMKVEDLDLLVEHVDSTNYKRTCLYLTSSSRFLPSPDDTLALDIAYTIYMKFEDLASALRIALLLDNKYVKQVYTATDDLVLKKQFSYIIARHGLAMEIDDEIAADENDKEMLQEIVNNTKLSEGYLTLARDIEVMEAKSPEDIYKVHLIDGRGASSSLDSARQNLAATFVNAFVNAGFGQDKLMTAPSDSSSSGSSGNWLFKNKEHG…
tr|A0A3B5Y5L2|A0A3B5Y5L2_WHEAT	TraesCS1A02G364100	Uncharacterized protein OS=Triticum aestivum OX=4565 PE=3 SV=1	7.81363	4.75308783805292|8.65102773469991|9.30948302255152|4.94916744581167|9.1373155924398|9.80965814957704|4.99493699582483|9.1768568004537|9.54115947508615	6.5221e-08	MASNQNQASYAAGETKARTEEKTGQMVGTTKDKAGQATETTKQKAGEAKDKTAQTAQAAKDRAAESKDQTGSYLGEKTEAAKQKASETAQYAQERSSDAAQYTEESAVAGKDKTGNVLQQAGETVANAVANTLGMGSPLAPQRTAPPRRSPGITRRMHTSNLC
tr|A0A3B6RDA2|A0A3B6RDA2_WHEAT	TraesCS7A02G107100	Ubiquitin-like modifier-activating enzyme 5 OS=Triticum aestivum OX=4565 PE=3 SV=1	2.05299	2.02191623150606|2.50864043760103|2.21878183837647|1.8022677627316|2.26177609073808|1.99642268999782|1.69018501257308|2.11680851138778|1.86012609167068	1.24942e-07	MEEELHALLRDLDALKQLPDPASIDRMRDRVVKMMGPSGAAAATRSKIKDMSAEVVDSNPYSRLMALQRMGIVDNYERIRDYSVAIVGVGGVGSVAAEMLTRCGIGRLLLYDYDTVELANMNRLFFRPDQVGMTKTDAAVQTLSEINPDVVLESYSLNITTVKGFETFLGSLKARSSNGRSTGVDLVLSCVDNYEARMVVNQACNELRQTWMESGVSEDAVSGHIQLLVPGETACFACAPPLVVASGVDERTLKRDGVCAASLPTTMGVVAGLLVQNSLKYLLKFGQVSPYLGYNSLKDFFPTMEMRPNPQCSNPACLERQKEYMQSKPARDAAAKAKMEAEASAAIEYPVHVDNEWNISVLDDSDTATSSVQRAAADILPEGLVRELPDEDSYVEPPA…
sp|P04464|CALM_WHEAT	TraesCS1D02G308100	Calmodulin OS=Triticum aestivum OX=4565 PE=1 SV=3	1.5508	1.54201338447994|1.44056202079049|1.47186249267801|1.45546719700439|1.39524804890608|1.39820934611997|1.81993002022579|1.71336615484376|1.72056645616839	1.15918e-06	MADQLTDEQIAEFKEAFSLFDKDGDGCITTKELGTVMRSLGQNPTEAELQDMINEVDADGNGTIDFPEFLNLMARKMKDTDSEEELKEAFRVFDKDQDGFISAAELRHVMTNLGEKLTDEEVDEMIREADVDGDGQINYEEFVKVMMAK
tr|A0A0C4BK41|A0A0C4BK41_WHEAT	TraesCS6D02G326400	AAA domain-containing protein OS=Triticum aestivum OX=4565 PE=3 SV=1	2.6225	2.72363454012533|3.04608862223197|3.07231915482261|2.10082505725826|2.33818681261028|2.36926209939424|2.50208441323186|2.81967772791443|2.63038642695901	1.53213e-08	MAPEPEDDIMAEKNPRPLDEDDIALLKTYGLGPYSTSIKTAEKEIKELAKRINDLCGIKESDTGLAPPSQWDLVSDKQMMQEEQPLQVARCTKIINPNTDDAKYMINVKQIAKFVVGLGDKVSPTDIEEGMRVGVDRNKYQIQIPLPPKIDPSVTMMTVEEKPDVTYNDVGGCKEQIEKMREVVELPMLHPEKFVKLGIDPPKGVLCYGPPGTGKTLLARAVANRTDACFIRVIGSELVQKYVGEGARMVRELFQMARSKKACIIFFDEVDAIGGARFDDGAGGDNEVQRTMLEIVNQLDGFDARGNIKVLMATNRPDTLDPALLRPGRLDRKVEFGLPDLEGRTQIFKIHTRTMNCERDIRFELLARLCPNATGADIRSVCTEAGMYAIRARRKTVTE…
tr|A0A3B6AVX7|A0A3B6AVX7_WHEAT	TraesCS2A02G174600	Uncharacterized protein OS=Triticum aestivum OX=4565 PE=4 SV=1	1.61478	1.48995819918806|2.08222179029747|1.87488106633122|0.89872818916202|1.27750591509836|1.1444829410404|1.55783145339091|2.19776214994365|2.00962470546841	0.00247559	MGRWLKPDVYPLIGAMSLVTGMCIFQLTRNVFLNPDVRVSKSNRQSAVPENEEEGERYSQHAFRRFVSAHRPEVFPAINRFFSGFSAK
tr|A0A3B6ASP6|A0A3B6ASP6_WHEAT	TraesCS2A02G079500	Oxoglutarate dehydrogenase (succinyl-transferring) OS=Triticum aestivum OX=4565 PE=3 SV=1	1.64181	1.79266483226325|1.89767851418137|1.69061146621097|1.47464462284209|1.57060735682447|1.39551426214209|1.65216723148313|1.75908009963834|1.54329219480706	3.97836e-07	MTWLRAATGLARHAARRAALARATIPTPGARSAGFHTSALRRRAAAPAPRAVPLSRLTDSFLDGTSSVYLEELQRAWEADPASVDESWDNFFRNFLGQAASPTAGLSGQTIQESMQLLLLVRAYQVNGHMKAALDPLGLDDRAVPEDLDLALYGFTEADLDREFFLGVWMMAGFLSENRPVLTLREILSKLERAYCGPIGFEYMHIPDRDKCNWLREKIETVAPREYPKDRRLVMLDRLIWSTQFENFLATKWATAKRFGLEGGETLIPGMKEMFDRSADLGVENIVIGMPHRGRLNVLGNVVRKPLSQIFSEFAGGTRPVEGEDGLYTGTGDVKYHLGTSYDRPTRGGKRIHLSLVANPSHLEAVDPVVIGKTRAKQFYSNDDDRTKNMGILIHGDGS…
tr|A0A3B6NIG8|A0A3B6NIG8_WHEAT	TraesCS6A02G006400	Uncharacterized protein OS=Triticum aestivum OX=4565 PE=3 SV=1	2.02126	1.84275531356287|1.96238129697026|1.90470722977567|2.04079830032512|1.99024030759961|2.00840958756515|2.26640111660468|2.44063236584672|1.73504571261949	3.57938e-08	MASPFGAASSCGLKAAAPSGFATRKQLSLVSPPLVSLPQRARPGRKCSFRVNAAKELYFNKDGSAIKKLQTGVNKLADLVGVTLGPKGRNVVLESKYGSPRIVNDGVTVAKEVELEDPVENIGAKLVRQAAAKTNDLAGDGTTTSVILAQGMIAEGVKIVAAGANPVQIARGIEKTTKALVSELRKMSKEVEDSELADVAAVSAGNNYEIGNMIADAMSKVGRQGVVTLEEGKSAENNLYVVEGMQFDRGYISPYFVTDSEKMSVEYENCKLLLVDKKINNARDLITLLEDAIKGGYPILIIAEDIEQEALATLVVNRLRGALKIAAIKAPGFGERKSQYLDDIATLTGGTVIREEIGLSLDKADKEVLGNAAKVVITKDSTTIVGDGTTQEEVTKRVT…
tr|W5CRJ3|W5CRJ3_WHEAT	TraesCS3B02G280800	Uncharacterized protein OS=Triticum aestivum OX=4565 GN=TRAES_3BF076000060CFD_c1 PE=3 SV=1	2.70493	1.29548651188215|1.29385109032694|1.27790373605228|3.25117411121306|3.28508427259061|3.23793871550585|3.58916317807966|3.61840084663681|3.49534555304144	0.000542799	MGTPSQGSAAVAAARVDLCALDLMPVFAKEMIAGGVAGAFSKTAIAPLERLKILLQTRTNEFRSLGVLKSLNKLRKHDGVLGFYKGNGASVLRIVPYAALHYMAYERYRCWILGNCPTLGTGPVVDLLAGSASGGTAVLCTYPLDLARTKLAFQVNNTDQPSNGLKRPIAPPSYGGIKDVFRGVYSEGGVRALYRGVGPTLMGILPYAGLKFYIYEGLKAHVPEDYKNSVTLKLSCGAAAGLFGQTLTYPLDVVRRQMQVQSHLQHDQSGGPRITGTFQGLKIIKQTQGWRQLFAGLSLNYIKVVPSVAIGFTAYDTMKHLLKIPPRESIKPEQGSA
tr|V9P6C8|V9P6C8_WHEAT	TraesCS1D02G000200	LMW-m glutenin subunit 10 (Fragment) OS=Triticum aestivum OX=4565 GN=Glu-3 PE=4 SV=1	1.60218	1.54678674333524|1.32794660932817|0.828739232723992|1.9912875761747|1.70312599964264|1.05602983771078|2.50355094095862|2.15168596782707|1.31050886121697	0.00747975	MKTFLVFALLAVAATSAIAQMETRCIPGLERPWQQQPLPPQQTFPQQPLFSQQQQQQLFPQQPSFSQQQPPFWQQQPPFSQQQPILPQQPPFSQQQQLVLPQQPPFSQQQQPVLPPQQSPFPQQQQQHQQLVQQQIPVVQPSILQQLNPCKVFLQQQCSPVAMPQRLARSQMLQQSSCHVMQQQCCQQLPQIPQQSRYEAIRAIIYSIILQEQQQVQGSIQSQQQQPQQLGQCVSQPQQQSQQQLGQQPQQQQLAQGTFLQPHQIAQLEVMTSIALRILPTMCSVNVPLYRTTTSVPF
tr|A0A3B6LYL8|A0A3B6LYL8_WHEAT	TraesCS5B02G554700	Uncharacterized protein OS=Triticum aestivum OX=4565 PE=3 SV=1	1.89084	1.90293281568666|2.17296085347944|1.94717181147646|1.2918403495985|1.49017967550092|1.33140841328487|2.17063547921368|2.49714437458088|2.21331398438015	5.99118e-05	MTAAVLARPTPGNVQCFGRKKTAVAVAHCKPGRGLIKALEPILLAGKSRFKGIDMRICVSGGGKVSQVYSIRQAIARALVAYNQKYVDEAAKKEVKEILGRYDRTLLVADPRCCEPKKFGGRGARARFQKSYR
tr|A0A3B6RBX7|A0A3B6RBX7_WHEAT	TraesCS7A02G176600	Uncharacterized protein OS=Triticum aestivum OX=4565 PE=3 SV=1	1.62176	2.13189446731671|1.33540101233708|1.37697199439841|1.83700171872349|1.16746286855979|1.19853582473561|2.42100442251015|1.53078304903568|1.59681693309514	0.000651189	MGRFGWLRLASRSLARRSGEASAQRSAWIRPSTPCTSSGADRCYGRSTFISSVPSRFFHSTGQRYSMDKDYYKVLGVTKDASQDDIKKAFQSLAKKYHPDTNRGNTAAKRMFQEVRDAYETLRDPSKRQQYDMLFSGGSAANSTRGRGEFDGSYQDPFSRFNKQNDDPFAQFYRQNDGPFSNQFYKVFSEVFQHDVDVHASDIEIELNLSFGEAAKGCTKEVPFSAKNLCYSCDGRGYLANARKYVCPSCKGAGKVSMYPFTSICTTCRGFGKVIKDHCLTCKGAGVVDGMKYANVIIPAGVDSGDTIHVREAGNSGGRGAIPGSLYIKLRVASDPVFVRDGADVHVDKKISFTQAMLGGKIEVPTLDGKTEIKIPKGVQPGQVVVLRGKGLELPNQAG…
tr|A0A0C4BKM5|A0A0C4BKM5_WHEAT	TraesCS1A02G132400	Histone H2A OS=Triticum aestivum OX=4565 PE=3 SV=1	1.50434	1.71709838222616|1.72082923265577|1.482698830141|1.33232030704109|1.34701863668844|1.11526417375441|1.65749338853372|1.67049611836916|1.4958787646014	3.75872e-05	MAGKGGKGLLAAKTTAAKGAADKDKDKKKAPVSRSSRAGIQFPVGRIHRQLKQRVSANGRVGATAAVYSAAILEYLTAEVLELAGNASKDLKVKRITPRHLQLAIRGDEELDTLIKGTIAGGGVIPHIHKSLINKTSKE
tr|A0A0C4BKL3|A0A0C4BKL3_WHEAT	TraesCS7D02G375500	AAA domain-containing protein OS=Triticum aestivum OX=4565 PE=3 SV=1	1.74701	1.7875297943619|2.04234745969868|2.04014717485704|1.45929191429267|1.65488689283177|1.64976176556838|1.56803677324815|1.80738970469768|1.7137376758415	4.31549e-07	MAEADDAAAARRRTVITEYRNKLLNCRELETRVRTGRENLKKAKKDYDKTEDDLKSLQSVGQIIGEVLRPLDSERFIVKASSGPRYVVGCRSKVDKEKLTAATRVVLDMTTLTIMRTLPREVDPVVYNMLHEDPGNVSYSAVGGLSDQIRELRESIELPLMNPELFLRVGIKPPKGVLLYGPPGTGKTLLARAIASNIDANFLKIVSSAIIDKYIGESARLIREMFNYAREHQPCIIFMDEIDAIGGRRFSEGTSADREIQRTLMELLNQLDGFDELGKVKMIMATNRPDVLDPALLRPGRLDRKIEIPLPNEQSRTEVLKIHAAGIAKHGEIDYEAVVKLAEGFNGADLRNVCTEAGMAAIRAERDYVIHEDFMKAVRKLNDAKKLESSAHYSADFGKD
tr|A0A3B6PQV3|A0A3B6PQV3_WHEAT	TraesCS6B02G346800	RRM domain-containing protein OS=Triticum aestivum OX=4565 PE=4 SV=1	1.57904	2.33272110146522|1.340583765732|1.35341918032818|2.32193560814438|1.26864422715064|1.30592356072317|2.02253612124855|1.17327389251076|1.09234742050086	0.00299479	MEAADVDMTAAGDDAAKELDEMKRRLKEMEEEAAALRDMQAKVAKEMQGGDANASTAEAKEQVDYACTPEEVQQHFQACGTVNRVTILTDKFGQPKGFAYVEFLEQEAVQEALNLNESELHGRQIKVSPKRTNVPGMKQRPPRGFNPYHAYPYRSYGAPYFPPYGYGRVPRFRRPTRYRPYF
tr|A0A3B5YYW4|A0A3B5YYW4_WHEAT	TraesCS1B02G264900	Pyruvate, phosphate dikinase OS=Triticum aestivum OX=4565 PE=3 SV=1	1.57833	1.58724126031757|1.63341534380933|1.39767090096068|1.78249147864145|1.85451971292706|1.53194061764291|1.50763281385042|1.56567835831879|1.34439179392663	1.08646e-06	MAPAQCARVQRVFHFGKGKSEGNKAMKDLLGGKGANLAEMASIGLSVPPGFTVSTEACEQYQAAGKALPPGLWEETLEGLKWVEEYMGARLGDPARPLLLSVRSGAAVSMPGMMDTVLNLGLNDEVAAGLAAKSGDRFAYDSYRRFLDMFGNVVMDIPHALFEEKLEAMKAAKGVDNDTDLTANDLRELVGQYKNVYVEAKGEQFPSDPKRQLQLAVLAVFDSWDSPRANKYRSINQITGLRGTAVNVQCMVFGNMGNTSGTGVLFTRNPSTGEKKLYGEFLVNAQGEDVVAGIRTPEDLDAMRDHMPEAYTELVENCEILESHYKEMMDIEFTVQENRLWMLQCRSGKRTGTGAVKIAVDMVNEALVDRNTAIKMVEPGHLDQLLHPQFANPEAASYK…
tr|A0A3B6HYL5|A0A3B6HYL5_WHEAT	TraesCS4A02G324000	Uncharacterized protein OS=Triticum aestivum OX=4565 PE=3 SV=1	1.59707	1.58204402117507|1.77491626393389|1.76424522273149|1.35373153149513|1.51138121003255|1.50957109381066|1.52333922345116|1.72515448138498|1.62923094518363	2.71903e-07	MPAGRKRPAPSPFAGFSPFARSLLFSPASGFSRLPLTNAGPAAKPHQDTADMPPPPPKRAKQAEPTSDEEERPSSDADEELSGSDGDSDSSLECSSSDDDDASQEMETVQADFAFFDPKPTDFHGVRLLLKTYLDSKPWDLTGFVDLVLEQTTVGTVVKMAEDEDEDGEANGGDKSDTGDDDEDLFGLITVLNLGRYGENRCIKDLKEYLLAVCGDKDTKKKLKSLLEDKASTVGLLVCRRFVNFPYEMVPKMYDSLFDEVAWATEDEPTQELQDSFRFKQYLLLVRILERKTPPKQKAKNSKDEDEPVIYPKLEDEIFRELSSWSFTFPIRAEQSAQQELKNYKEMGLVMCVKAEAIPKFRKKLEALVSE
tr|A0A3B6THF8|A0A3B6THF8_WHEAT	TraesCS7D02G000300	Plastocyanin OS=Triticum aestivum OX=4565 PE=3 SV=1	1.53856	1.50423580803418|1.36614674454862|1.35187525230031|2.14383430886358|1.52145752321544|1.49832886223327|1.86605332519332|1.31105010595893|1.28402161115626	8.53261e-05	MAALSSAAVSVPSFAAKAATPMRSSRMVVRASLGKKAASAAVAVAASAMLLGGSAMAQDVLLGANGGVLVFEPNEFSVKSGETITFKNNAGFPHNVVFDEDAVPSGVDVSKISQEEYLNAPGETFSVTLTVPGTYGFYCEPHAGAGMVGKVTVN
tr|A0A3B5ZRD1|A0A3B5ZRD1_WHEAT	TraesCS1D02G087700	Carboxypeptidase OS=Triticum aestivum OX=4565 PE=3 SV=1	3.24026	3.3322064697363|3.7230201720228|3.39402505855905|2.69806360415225|3.06172110762761|2.77638773822156|3.24240325188878|3.63187643403394|3.30265138821767	9.76405e-10	MYSGYITVNESAGRSLFYLLQEAPEEAQPAPLVLWLNGGPGCSSVAFGASEELGAFLVKPRGAGLVLNEYRWNKVANVLFLDSPAGVGFSYTNTSSDIYTSGDNRTAHDSYTFLAKLFERFPHYKYLDFYIAGESYAGHYVPELSQLVHWRNKGIENPVINFKGFMVGNGLIDDYHDYLGTFESWWNHGIISDNTYRRLKASCLNDSFIRPSPACDAAVDVATAEQDNIDMYSLYTPVCNITSSSSSRRRPRGRYPWMTGSYDPCTAGCSTAYYNRRDVQRALHANVTGAMDYTWATCSHTINTHWHDTPRSMLPIYKELIAAGLRIWVFSGDTDAVVPLAATRHSIGALGLPTTTSWYPWYDDQEVGGWSQVYKGLTLVSIRGAGHEVPLHRLRQALV…
tr|Q0GNG0|Q0GNG0_WHEAT	TraesCS1D02G000200	Low molecular weight glutenin (Fragment) OS=Triticum aestivum OX=4565 GN=lmw-gs PE=4 SV=1	1.57016	1.48548139567217|1.82778245166203|1.73375005619854|1.61441213913536|1.95036988111043|1.87303130133188|1.09039690570586|1.35429707563144|1.20194200713433	0.000228123	MKTFLVFALLTVAATSAIAQMETRCIPGLERPWQQQPLPPQQTFPQQPLFSQQQQQQLFPQQPSFSQQQPPFWQQQPPFSQQQPILPQQPPFSQQQQLVLPQQPPFSQQQQPVLPPQQSPFPQQQQQHQQLVQQQIPVVQPSILQQLNPCKVFLQQQCSPVAMPQRLARSQMLQQSSCHVMQQQCCQQLPQIPQQSRYEAIRAIIYSIILQEQQQVQGSIQSQQQQPQQLGQCVSQPQQQSQQQLGQQPQQQQLAQGTFLQPHQIAQLEVMTSIALRILPTMCSVNVPLYRTTTSVPFGV
tr|A0A077RQ51|A0A077RQ51_WHEAT	TraesCS1D02G232900	Histone H2B OS=Triticum aestivum OX=4565 GN=TRAES_3BF067800300CFD_c1 PE=3 SV=1	1.78106	2.88045258693534|1.08544512165602|0.935172245986894|2.67070128977506|1.02624331890741|0.878597417418358|3.81770554515518|1.4520497400335|1.28313380453778	0.0446614	MAPKAEKKPAAKKPAEEEPAAEKKPKAEKRDGDKKGKKKAKKSVETYKIYIFKVLKQVHPDIGISSKAMSIMNSFINDIFEKLAGEAAKLARYNKKPTITSREIQTSVRLVLPGELAKHAVSEGTKAVTKFTSS
tr|A0A3B5ZPT5|A0A3B5ZPT5_WHEAT	TraesCS1D02G087600	Carboxypeptidase OS=Triticum aestivum OX=4565 PE=3 SV=1	1.66241	1.45367195058122|1.68232464455918|1.70821454899251|1.54095998310803|1.76239223017527|1.80542759597148|1.58744981987934|1.84266404255261|1.57858195939926	5.7416e-08	MRTMTRRLPPAPAPAAAVAVLLAALTCLLRPAAASGHAADRIARLPGQPAVDFDMYSGYITVDEAAGRSLFYLLQEAPEDAQPAPLVLWLNGGPGCSSVAYGASEELGAFRVTPRGAGLVLNEYRWNKVANVLFLDSPAGVGFSYTNTSSDIYTSGDNRTAHDSYAFLAKWFERFPHYKYRDFYIAGESYAGHYVPELSQLVHRASNPVINLKGFMVGNGLIDDYHDYVGTFEFWWNHGLVSDDTYQRLTEACLHDSFIHPSPACDAATDVATAEQGNIDMYSLYTPVCNITSSSSLSQRRPRGRYPWLTGSYDPCTERYSTAYYNRRDVQMALHANVTGAMNYTWTTCSDTINTHWHDAPRSMLPIYRELIAAGLRIWVFSGDTDAVVPLTATRYSIG…
tr|A0A3B6TDT1|A0A3B6TDT1_WHEAT	TraesCS7D02G248900	UVR domain-containing protein OS=Triticum aestivum OX=4565 PE=4 SV=1	1.50064	1.55357509660625|1.7761064504388|1.42832377380287|1.37523563890976|1.45607909487453|1.20826247495419|1.59434572685495|1.84186111311314|1.27199350264735	2.99806e-05	MASQDGGWGDGGDSLFEGMVLFAPADPAAAEAEEAPEPPKPPTPPPAAAAASDAESSATSQPLDEDLFSDLTLLAPQPPLDQDQHPQPQAQDQNHRPASPVAVTPPPAAAALSRQPSSSSLRKKKRAVRIGYGRSPQTAPALPPTVPIANTAAPAAAAATATVLRTTSSSSSLSDASTYDAIPPIPIQYLDQLGNDDERDAAVVDPDANSLDAISVNSLDAKQEAKEEDGGKDAGEAVVAVVGIEERLALLRSQISSKLDSIQQSAAAVAAKRRQLAGRQRKVAEDVGSAASRHKDLERELEEACEAEDFERAERISDSLAALEKDKDRLLTALRDAELDYDSVDLELQDVLESRIAVEEEAAALLEQFAKDATEHADSVSKQAEEMSSKEIEGWQTSM…
tr|D3UAL7|D3UAL7_WHEAT	TraesCS1B02G011600	Low molecular weight glutenin subunit B3-2 (Fragment) OS=Triticum aestivum OX=4565 PE=4 SV=1	1.55869	1.50717215432647|1.81016843915769|1.79798384739997|1.41171014942522|1.68417133815397|1.68317932517408|1.2316630481292|1.49320726664861|1.40894845965441	7.47162e-06	IPFVHPSILQQLNPCKVFLQQQCSPVAMPQSLARSQMLQQSSCHVMQQQCCQQLPQIPQQSRYEAIRAIIYSIILQEQQQVQGSIQSQQQQPQQLGQCVSQPQQQSQQQLGQQPQQQQLAQGTFLQPHQIAQLEVMTSIALRTLPTMCRVNVPLYRTTTSVPFG
tr|A0A3B6RJF0|A0A3B6RJF0_WHEAT	TraesCS7A02G291600	CS domain-containing protein OS=Triticum aestivum OX=4565 PE=3 SV=1	1.8065	1.62568785542276|2.40712438620651|1.9445726659292|1.45728108635052|1.6155548127749|1.46388373996073|1.86237556081455|2.0814580174303|1.80059306842937	6.1529e-06	MSRHPEVRWAQRIDKVYITVQLPDAKDAKVNLEPDGVFSFFATAGTDGNSYESKLDLNDKVNVEASKVSVGVRSIFCILEKADAKWWNKLVRDDQKAPHFVKVDWDKWVDEDDDGADVNVDGMDFSNMGGMGGMPGMEGLGGMGGMGGMPGMEGLGGMGGLAGMMGGMGGMGGMGMPPGMEGLGGMGMDDFEDESDDEGEVSKPQDAGKSDAAEISEVEGKAGTAAQSN
tr|A0A159KI10|A0A159KI10_WHEAT	TraesCS1B02G041928	Omega-secalin OS=Triticum aestivum OX=4565 PE=4 SV=1	5.90846	4.86136230011589|5.34044668579112|5.29656698619179|6.15994007500435|6.85776210784553|6.75068888385604|5.69293112796755|6.25422563071367|5.96217420148349	5.43716e-11	MKTFLIFVLAMTMSIITTARQLNPSEQELQSPQQPVPKEQSYPQQPYPSHQPFPTPQQYSPYQPQQPFPQPQQPAPIQPQQPFPQQPQQPFPQPQQQLPLQPQQPFPQPQQPIPQQPQQSFPQQPQRPEQQFPQQPQQIIPQQTQQPFPLQPQQPFPQQPQRSFAQQPKQIISQQPFPLQPQQPFSQPQQPFPQQPGQIIPQQPQQPSPLQPQQPFSQQPQRPQQPFPQQPQQIIPQQPQQPFPLQPQQPVPQQPQRPFGQQPEQIISQRPQQPFPLQPQQPFSQPQQPLPQQPGQIIPQQPQQPFPLQPQQPFPQQSKQIIPQQPQQPFPLQPQQPSPQQPQLPFPQPQQPFVVVV
tr|A0A3B6I054|A0A3B6I054_WHEAT	TraesCS4A02G278900	Germin-like protein OS=Triticum aestivum OX=4565 PE=3 SV=1	1.56863	2.20237186120727|1.27978171459269|1.26962714779374|2.1365859554145|1.2129778691984|1.21147283070032|2.14427733088103|1.33255428132124|1.3279920847956	0.00158381	MVYSKTIACMFTMLLLAPAIMATDPDPLQDFCVADLDDNAVRVNGYPCVPQSEAGDDFLFSSKLARGGNTSTPNGSAVTRLDVTEFPGENTQGISMNRVDFAPGGTNPPHIHPRATEIGLVVKGELLVGIIGSNESGNRLYSRVVRAGENFLIPRGLMHFQFNTGDTVATMFVSFNSQNPGIVFVPLTLFGSDPPIPTPVLTRALRVDAGVVELLKSRFAGGS
tr|A0A3B6SN54|A0A3B6SN54_WHEAT	TraesCS7B02G241100	Reticulon-like protein OS=Triticum aestivum OX=4565 PE=4 SV=1	1.53952	1.76026339811322|1.65122989550173|1.5795053365318|1.58628679913046|1.51247859606713|1.43922433195193|1.59422423754387|1.27082483503556|1.46162121395704	7.6299e-07	MADPAEETVAAPPPTPAAPAEGAPPLSAEPPASTDASPEKAAPPAPAPDTTVRSRGFRLLGEDTSVHKVLGGGKTADVLLWKDKKTTAVVIGGTTVIWVLFEVLDYHLLTLLSHVMIGVLAILFVWSKAMTFIKNPPDIPVVEIPEDLAVNVSRALRSDVNRSLHLLREIAMGHDLKKFLGVIAGLWVLSEVGSCCDFLTLIYIAVLMIHTVPILYDKYQDKVDHFAGKAHTEACKHYEVLDQKVLSKIPRGPAKTKKT
tr|A0A3B6TC30|A0A3B6TC30_WHEAT	TraesCS7D02G191300	Uncharacterized protein OS=Triticum aestivum OX=4565 PE=4 SV=1	1.67561	1.9272911879861|1.68859952849076|1.63653464941188|1.64583142268633|1.45277202402318|1.40919801146143|1.9434643350611|1.72322236117827|1.65361453349449	5.97263e-07	MATAYNLRSRDEPDDFDEFDSTPYGGGYDLFVTFGRPLPPSDETCYPCSAPSTSYDAPHYAAEEPSPYAHHQKPQPAYGFRPQNEQQQQPSYGREDDDSGYVSKPKPKPQPAYGFRPQAEEEQRPSYGGGGEEDDSGYGSKPQPAYGFRPQQEEQPAYGSGYGSKPQRSQEDTYGSGYGRKPQQEEPAYGSGYGSGYGRKPQAEESYGSGYGNTTQPEEGYGSGYGSKPQVEQTYGGSEYGSGYGRKPQVEESYGSGYGSRPQGGEEYGSAGYGGRKTEEEGYGGSGYGSGRKVQEEDEGAYGSGGYQKPKPYGEETQASYGGGYEKPSYGGGNYGRKKQDDDSDDEKKNRYAKRDDSDDEKERYEKHHHHRRHNYDD
tr|A0A3B6PL12|A0A3B6PL12_WHEAT	TraesCS6B02G211800	Lactamase_B domain-containing protein OS=Triticum aestivum OX=4565 PE=4 SV=1	1.85213	1.19335253126087|1.42004967411984|1.25642964831249|2.57189598720427|3.06079525982685|2.71334391078794|1.40438025364849|1.68321682358705|1.3657506292491	0.00185078	MAKRGKSAEAATSTAPPPSPSPAIKAKAKPRLEIEGYPVEGISIGGHETCVIFPTLSLAFDIGRCPQRAVAQDFLFISHAHLDHIGGLPMYVATRGLYRLRPPTIFVPKYLRELVERLFDVHRAMDQSELNHALVPLDIGEEYELRRDLKVRAFKTYHTIPSQGYVIYSVKQKLKKDYLGLPGSEIKRLKLSGVEITNTVTTPEVAFTGDTMSDFILDPDNADVLKAKILVMEIANHSEKFENRAILLIHFSARYTTEEIDAGISRLPPSFRSRVYALKEGI
tr|A0A3B6INS5|A0A3B6INS5_WHEAT	TraesCS4B02G072100	Uncharacterized protein OS=Triticum aestivum OX=4565 PE=4 SV=1	2.48276	2.68259453534932|2.87559277686952|2.95652377011924|1.85636449677941|1.94044511311286|2.02525470721834|2.64613829515927|2.86323475109525|2.49872754726215	4.53912e-07	MGNHQKILNFLRSDPAAVAACSPRSFSSSSASVSDDDGYSCSSYPTTDGDASPSRYGGSSTPPTPKSPWAHLPGLGAGGAVAEPGATGLIASLVKEDGHVYSLAATGDVLYTGTNSPNVRVWRDQRELAGFRTASGLVKAIVVADDGRIFTGRQDGKVRVWRADADNPAVHRQVGSLPKLKDYLKCAVNPTSYVETQRRGRQRAVWLRHSDAVSSLSLDEGAGLLYSASWDRTFKVWRVSNSKCLESVSAHDDAVNTVAAAGFDSVVFTGSADGTVKVWRREMAAKGDATKHVLKTVLRKGEGAVTAIAVSPEDRVVYVGSSDGLVTYWHWVDGEARYGGVLKGHKTAVMCLAVAGNVVVSGSADRTLCVWGRDGAEHVGLGVLAGHTGPVKCVAMDEE…
tr|A0A3B6MTB1|A0A3B6MTB1_WHEAT	TraesCS5D02G253700	Glucose-6-phosphate isomerase OS=Triticum aestivum OX=4565 PE=3 SV=1	2.3191	3.00646550802856|2.44935397350559|2.72716056030068|1.78573940309771|1.82281464389387|1.68701142523735|2.52608861120619|2.58780387508974|2.27950666060751	2.20029e-06	MASISGAAAPPSSSSACRLRLRRQLLMRPSHLRLRAPHSIADLSRSSHSHAPAPPLASRAPAQGGGAVEKDPIKLWDRYVEWLYQHKQLGLFVDVSRMGFTDDFLQRMEPLMQRAFVAMGELEKGAIANPDEGRMVGHYWLRDPGLAPNSFLRTKIEKTVDHILAFSQDIVSGKIKPPSSQVGRFTQILSIGIGGSSLGPQFVSEALAPDNPPLKIRFIDNTDPAGIDHQIAQLGEELKSTLVIVISKSGGTPETRNGLLEVQKAFRDAGLDFSKQGVAITQENSLLDNTARIEGWLDRFPMFDWVGGRTSELSAVGLLPAALQGIDVKEMLVGAALMDEETRNTVVKENPAALLALSWYWATDGIGSKDMVVLPYKDSLLLLSRYLQQLVMESLGKEY…
tr|A0A3B6C720|A0A3B6C720_WHEAT	TraesCS2B02G311100	Ferredoxin OS=Triticum aestivum OX=4565 PE=3 SV=1	2.48283	2.73386607041661|2.26256925822442|2.58834851804435|1.92418617670499|1.61600763850746|1.84108854403836|3.36187947954299|2.8085286204052|3.20900892741198	6.67535e-06	MATTFAAPILCNLRANPRLNHSTRQQPRHLHLSSARMAPTLTGSRARSDFRAAAVYKVKLIGPEGKESVIEVAEDSYILDAAEEAGVELPYSCRAGACSTCAGKVLEGGVDQSDQSFLDDAQVSAGYALTCVAYPTSDLVIQTHKESDLY
tr|A0A3B6EDF0|A0A3B6EDF0_WHEAT	TraesCS3A02G122900	Ubiquitin carboxyl-terminal hydrolase OS=Triticum aestivum OX=4565 PE=3 SV=1	2.37034	2.53141297172527|2.50811104354594|2.7243305449633|2.00039084762727|1.94419812247648|2.13701716155988|2.54608908315471|2.54641637279364|2.39509156332545	2.41671e-08	MDLLRANLHKVRIPEPTNRIHKDECCVSFDTPRSEGGLYVDMNSFLGFGREHVAWNFEKSENPVYLHIVQRRKPEPDETDRPLKKPTLLAIGMEGGFGEQEPEYDVTYKIVILPEFLSLPFPSVDLPEKVRLAVDKVILAESADRKQQLASWVADKKIISAHAMDLQQLDNGVIVPPTGWKCSKCDKTENLWLNLTDGMILCGRWVWDGTGGNNHAVEHYQQTKYPLAVKLGTITADLEGADVYSYPEDDSVEDPILAQHLSHFGIDFSSLQKTEMTTAERELDHNTNFDWNRIQESGKDAEPLYGPGYTGLVNLGNSCYMASVMQVMFSTHPFISRYFEKQSLKAAFAISKADPTLDLNMQMTKLAHGMLSGKYSAPSQEGQEGIRPRMLKSVIAASH…
tr|A0A3B6RKP0|A0A3B6RKP0_WHEAT	TraesCS7A02G320500	Uncharacterized protein OS=Triticum aestivum OX=4565 PE=4 SV=1	1.52428	0.893193303684382|1.28153317067925|1.2029942328911|0.900663185334185|1.28653903732587|1.21317976830651|1.87559399868732|2.67855285819875|2.38629080661295	0.0289124	MADSDASAAPPEVATEMKIPVVDLTDAVQEDAAPDRAAAAPTQEEEPSEVAEAEGDHKRKLEEVDAGAEANGAGEDAKRPRVEGNGADAVQNSESSEKPEEPVAVITEGAADAEVAPAGDLQTSSEVKPQETATEAPPQQQEGDATGALQETTRLIDVPNTKVGVLIGKAGETIRNLQMSSGAKIQITKDADVPSDATTRPVELVGTTESIDKAEQLIKSVIAEAEAGGSPALIAKGFGSGQSGSEQFEMLVPDNKVGLIIGKGGETIKNLQTRSGARIQLIPQHPPAGTTLTERTVRVTGNKKQIEAAKELIKQAMSQTFPRNTTQSGGYGPQHHNPQGHGPASQWGPRSQPQQYGYPPRGPPQNAPYSQPPYGGYPQQPPPRGGMGWDQRQGPPPHQ…
tr|A0A159KI88|A0A159KI88_WHEAT	TraesCS1B02G041928	Omega-secalin OS=Triticum aestivum OX=4565 PE=4 SV=1	3.01785	2.00615011707206|3.18486299127785|1.86623559316275|3.29598293474842|5.11805106090873|3.05852192910523|2.5074690586592|4.0182320401569|2.10518532578569	1.37917e-05	MKTFLIFVLAMTMSIITTARQLNPSEQELQSPQQPVPKEQSYPQQPYPSHQPFPTPQQYSPYQPQQPFPQPQQPTPIQPQQPFPQQPQQPFPQPQQQLPLLPQQPFPQPQQPIPQQPQQSFPQQPQRPEQQFPQQPQQIIPQQTQQPFPLQPQQPFPQQPQRPFAQQPEQIISQQPFPLQPQQPFYQPQQPFPQQPGQIIPQQPQQPSPLQPQQPFSQQPQRPQQPFLQQPQQIIPQQPQQPFPLQPQQPVPQQPQRPFGQQPEQIISQRPQQPFPLQPQQPFSQPQQPFRHQPGQIIPQQPQQPFPLQPQQPFPQQPEQIIPQQPQQPFPLQPQQPSPQQPQLPFPQPQQPFVV
tr|A0A3B6EAX7|A0A3B6EAX7_WHEAT	TraesCS3A02G022800	Uncharacterized protein OS=Triticum aestivum OX=4565 PE=4 SV=1	1.50587	1.58143291309606|1.60562645856378|1.43525967051507|1.53315463989958|1.50678122936819|1.36976166463029|1.57937511113418|1.61864302386171|1.32281788144157	1.60817e-07	MATSKKVVTREEWEGKLRDVKIRKEDMNRLVMNFLVTEGFVDAADRFRVESGTRPEIDLATITDRMEVKKAVQSGNVQEAIEKINDLNPTILDTNPEIYFHLQQQKLIELIRVGKIHEALEFAQEELAPRGEENIAFLEEIEKTVALLVFEDVKNCPYGELLDVSQRLKTASEVNAAILTSQSHEKDPKLPSLLKMLIWAQNQLSEKAAYPQINNLSTADLEDPAI
tr|A0A3B5XV61|A0A3B5XV61_WHEAT	TraesCS1A02G076100	Uncharacterized protein OS=Triticum aestivum OX=4565 PE=3 SV=1	1.6366	1.55471481015605|1.7394975777634|1.7510729779556|1.2339108401648|1.38702785082011|1.40032930972281|1.87108409112998|1.74115188991303|2.05062306802883	2.13822e-05	MEGVACLVGECRLLLQAVCQVLSRTRGVRSNSSTEILQGLLEMGIRGVTVSDVRGYGAQGGSTERYEGSEFSEDTFIAKVKMEIVVCKEQVEPVIDKIIEKARTGEIGDGKIFLIPVADVVRVRTGERGVHAERMIGGLSDKLPPVITIS
tr|A0A3B6EPW4|A0A3B6EPW4_WHEAT	TraesCS3A02G484500	Histone H3 OS=Triticum aestivum OX=4565 PE=3 SV=1	2.2784	1.79765495459507|2.20310023893898|2.24984810511338|1.69629065508337|2.10235118661108|2.13328606005195|2.4128501451933|2.95676124781201|2.9534194636081	1.40156e-06	MARTKQTARKSTGGKAPRKQLATKAARKSTPTTGGVKKPHRYRPRTVALREIRKYQKSTELLIRKLPFQRLVREIAQDFKTDLRF
tr|A0A5B9Y471|A0A5B9Y471_WHEAT	TraesCS1D02G001100	Gamma-gliadin OS=Triticum aestivum OX=4565 PE=4 SV=1	2.47881	2.41543622009764|2.73749315051006|2.3990441319932|2.3305387560171|2.6811585394736|2.31301713278851|2.35715102132325|2.66697359194778|2.40849906106734	1.36082e-10	MKTLLIVTILAMATTIATANMQVDPGYQVHWPQQQPFLQPQQPFCQQPQQTIPQPHQTFHHQPQQTFPQPQQTYPHQPQQQFPQTQQPQQPFPQPQQTFPQQPQLPFPQQPQQPFPQPQQPQQQFPQSQQPQQPFPQPQQQFPQPQQPQQSIPQQQQPLIQSSLQQQMNPCKNFLLQQCNPVSLVSSLVSLILPRSDCQVMQQQCCQQLAQIPHHLQCAAIHSVAHSVIMQQQQQQGIQILRPLFQIVQGQSIIQQQPAQLEVIRSLVLKTLPTMCNVYVRPDCSNIRTPFASTIAGIGGQ
tr|A0A3B6KQ24|A0A3B6KQ24_WHEAT	TraesCS5A02G460900	RRM domain-containing protein OS=Triticum aestivum OX=4565 PE=4 SV=1	1.67162	2.05694719084096|1.73024790632246|1.56001611381823|1.67752279886736|1.40328818328305|1.27056781261571|2.06614389699891|1.75435634004858|1.52550347935154	1.43753e-05	MAFLQKVGNALKRSAGSGSAMLQAVRSMSSAKVFVGGISYGTDDQSLADAFSNYGQVVESKVIMDRESGRSRGFGFVTYTSAEEAGAAITGMDGKDLQGRIVRVSYAHDRGSRPSFGGGGGYGSGGGYGGADGGYGGGGGSYGGGGGYSGGGGYGGGGRGGGGGGYNSGGNYNSGYNSGGNYGAPQGGQGGYGGDAGFTGVGGGGYNAAPANNYGGDSLNQGGGAPPAFGGRNFGAGNDSYANDAPVDLPPGKLDDLLKDLKFDVGGKEDGAVEGDADTKRSEGQDDFLDDDFSKDEDDYANKRS
tr|I6QF63|I6QF63_WHEAT	TraesCS3A02G033900	Small heat shock protein OS=Triticum aestivum OX=4565 GN=Mds1 PE=3 SV=1	1.74399	1.47464165023108|1.86830335751799|1.6398848272332|1.55328206160885|1.96105227907876|1.76178461613463|1.62237339077303|2.08097202145865|1.73358773807268	4.35839e-07	MSIVRRSSVFDPFADLWADPFDTFRSIIPAISGGNSETAAFANARMDWKETPEAHVFKADLPGVKKEEVKVEVEDGNVLVVSGERTKEKEDKNDKWHRVERSSGKFVRRFRLPEDAKVEEVKAGLENGVLTVTVPKAQVKKPEVKAIQISG
tr|A0A3B5Y6B4|A0A3B5Y6B4_WHEAT	TraesCS1A02G402800	Eukaryotic translation initiation factor 3 subunit D OS=Triticum aestivum OX=4565 PE=3 SV=1	1.50818	1.60167636663822|1.47954321567878|1.49653950697322|1.36298278084328|1.27324990413111|1.28407712793627|1.76729174346657|1.6453097924728|1.66295734015803	6.70221e-06	MGFDVGVVPFNPDGWGPPDAPGAAPLLGGAVATASIPFAPFSRSDKLGRIADWTRNPGHPGAHGHHAAAASRDSVFDFSSADDSLAAAAEDSSFSLVDAKPPPKHPRFGPKWRFNQRPQLPQRRDEEVEAKRREAEKERARRERHYQNHRSHHHQGFRGNQQNTAKPSVDIQPDWTILEQIPFANFTKLSFAVNDQPEDLLVCGAVDSYDRTYDRVNPKTARRLERFKNRQFFKITTTDDPIIRRLAEEDKATVFATDAILAALMCTPRSILSWDIVVQRVGNKLFFDKREGSQLDLLTVNETAQEQLPENKDDINSAPALAVEATYINQNFSQQVLVRDGEKVTFDEPNPFASENEEAAPVCYRYRRWKLDDDISIIARCEVHAAGVDPTGARQFLTL…
tr|A0A3B5Z5F1|A0A3B5Z5F1_WHEAT	TraesCS1B02G432200	Eukaryotic translation initiation factor 3 subunit D OS=Triticum aestivum OX=4565 PE=3 SV=1	1.64228	1.86387995229806|1.78190598736552|1.60637812227238|1.47273365823876|1.42940428846576|1.28307693513524|1.87779646080581|1.81212199589835|1.65325799208047	4.20104e-06	MGFDVGVVPFNPDGWGPPDLPGAAPLLGGAVATASIPFAPFSRSDKLGRIADWTRNPGHPGAHGHHGAAAVSRDSVFDFSSADDSLAAAAEDSSFSLVDAKPPPKHPRFGPKWRFNQRPQLPQRRDEEVEAKRREAEKERARRERHYQNHRSHHHQGFRGNQQNTAKPSVDIQPDWTILEQIPFANFTKLSFAVADQPEDLLVCGAVDSYDRAYDRVNPKTARRLERFKNRQFFKITTTDDPIIRRLAEEDKATVFATDAILAALMCTPRSILSWDIVVQRVGNKLFFDKREGSQLDLLTVNETAQEQLPENKDDINSAPALAVEATYINQNFSQQVLVRDGEKVTFDEPNPFASENEEAAPVCYRYRRWKLDDDISIIARCEVHAAGVDPSGARQFLT…
tr|A0A1D6BYQ7|A0A1D6BYQ7_WHEAT	TraesCS7D02G157200	AAA domain-containing protein OS=Triticum aestivum OX=4565 PE=3 SV=1	1.82407	1.82051977625823|2.26233049083205|2.11402091398902|1.39500025975558|1.73749065201906|1.62643092789402|1.61371151748903|2.02222519505597|1.8249050596538	2.41817e-06	MAPEPEDDFLNEKNPRPLDEDDIALLKTYGLGPYSNSIKKVEKEIKEMAKKINDLCGIKESDTGLAPPSQWDLVSDKQMMQEEQPLQVARCTKIISPNTDDAKYVINVKQIAKFVVGLGDKVSPTDIEEGMRVGVDRNKYQIQIPLPPKIDPSVTMMTVEEKPDVTYNDVGGCKEQIEKMREVVELPMLHPEKFVKLGIDPPKGVLCYGPPGTGKTLLARAVANRTDACFIRVIGSELVQKYVGEGARMVRELFQMARSKKACIVFFDEVDAIGGARFDDGAGGDNEVQRTMLEIVNQLDGFDARGNIKVLMATNRPDTLDPALLRPGRLDRKVEFGLPDLEGRTQIFKIHTRAMNCERDIRFELLARLCPNSTGADIRSVCTEAGMYAIRARRKTVTE…
tr|A0A3B6JP09|A0A3B6JP09_WHEAT	TraesCS4D02G265700	PCI domain-containing protein OS=Triticum aestivum OX=4565 PE=3 SV=1	1.77077	1.63025396390693|1.84748284972602|1.69010926126385|1.74138188587504|1.96528792021346|1.80198728383022|1.6815390522706|1.9230191495408|1.65586943511532	6.19462e-09	MDVQMGEPQAAPPPAAAAAAPAPSTIQHLKEIAAVIEAGSVTKEVRRISRAVRLTVALRRRLAARDVSAFLAFALPANSDAYARLTPLLPKEDEAEMDIDAAAPATQISIKHGLPEIEIYCSLLVLIFLIDQKKYDEAKACATGSIARLKNLNRRTVDVLASRLYFYYSYVYELTNTLAEIRGNLLGLHRMATLHHDELGQETLLNLLLRNYLHYNLYDQAEKLRSKAPRFEAHSNQQFCRYLFYLGKIRTIQLEYTDAKESLLQAARKAPAAARGFRIQCNKWAIIVRLLLGEIPERTVFMQKGMKEALAPYFELTNAVRIGDLELFRAVADKFASTFSADRTHNLIVRLRHNVIRTGLRNISISYSRISLADIAKKLRLDTENPVADAECIVAKAIR…
tr|A0A3B6JNG2|A0A3B6JNG2_WHEAT	TraesCS4D02G339500	Uncharacterized protein OS=Triticum aestivum OX=4565 PE=3 SV=1	1.98804	1.97600223019236|2.10923139783043|1.85826264805685|1.47585522327264|1.59451981029899|1.4013757122426|2.47236424344608|2.66413700497536|2.34062595256846	2.44856e-05	MPAGHGLRSRTRDLFARPFRKKGYIPLTTYLRTYKVGEHVDVKVNGAVHKGMPHKFYHGRTGRVCNVTKRAIGVEINKQVGNRIIKKRIHVRVEHVQPSRCNEEFLQRKLNNDKLKAEAKARGEVISTKRQPAGPKPGFMVEGTTIETVTPIPYDVVNDLKGGY
tr|Q0Z9W1|Q0Z9W1_WHEAT	TraesCS5B02G072100	Histone deacetylase HDAC4 OS=Triticum aestivum OX=4565 PE=2 SV=1	1.56129	0.981385991493852|1.03841942579878|0.877278482723462|2.38373259751167|2.54958020449638|2.15016988252555|1.36924805510114|1.46247060777663|1.23928125367517	0.0224144	MLLHSEMEIKPNPHPERPNRLRAIAASLAAAGIFPSKCALVPPRETTKEELVMVHTSDHVESVEQTKNMLYSYFTSDTYANGHSACAAKLAAGLCADLASLMVSEHFQNGFALVRPPGHHAGVKQAMGFCLHNNAAVAALAAQKAGAKKVLIVDWDVHHGNGTQEIFEGNKSVLYISLHRHEDGSFYPGTGAADEVGVLDGKGFSVNIPWSCGGVGDNDYIFAFQHVVLPIATEFAPDITIISAGFDAARGDPLGCCDVTPAGYSQMTSMLTACSEGKLLVILEGGYNLRSISSSATEVVKVLLGDGPSYGTNAAAPSKEGMQTALQVLDIQQKYWPVLVPIFASLQAQQGPTSSKYVNAENKLKRRMLTGGPGPVWWKWGSKRLLYEVLFEGRRPRKS…
tr|A0A3B6DIW5|A0A3B6DIW5_WHEAT	TraesCS2D02G427700	26S proteasome non-ATPase regulatory subunit 1 homolog OS=Triticum aestivum OX=4565 PE=3 SV=1	1.82657	1.8885234861997|1.93542347434574|1.94022276863236|1.65800342423522|1.69566170160383|1.68665156523603|1.87599195216068|1.9281424035466|1.83050987319797	2.8072e-09	MAAVATVSSAGGILAMLHEPAEELKLHALASLNSVVHLFYPEISTSIPTIESLYEDEEFDQRQLAALVVSKVFYYLGELNDALLYALGAGPLFDVSEDSDYAHALLAKALDEYASFKTRASKATEEEENVDPRLEAIVERMLEKCVLDGKYQQAMGMAVECRRLDKLEEAIVRCDNIHGALSYCINLSHQYVSHREYRCEVLRCLVKIYQTLPHPDFLSICQCLMFLGEPETVANILDTLISGSKDDALLAYQIAFDLVENENQAFLLNVRNRLDSQTPEPAGDVQMGDDTTTANGNAHPVDPNEAAHADKLAKLKGILSGEKSIQLTLQFLYSHNRSDLLILKTIKQAVEMRNSVCHSATICSNAIMHAGTTVDTFLRENLEWLSRATNWAKFSATAG…
tr|A0A3B6TSI9|A0A3B6TSI9_WHEAT	TraesCS7D02G317400	Uncharacterized protein OS=Triticum aestivum OX=4565 PE=4 SV=1	2.36491	2.41037563488228|1.84374883335043|1.96919593568755|2.28800955202792|1.75559508576893|1.87651666227016|3.57183505984294|2.75791254198916|2.81103839417377	5.97759e-06	MADSDASAPPPEVATEMKIPVVDLTDAVQEDAASDPAAAAPTQEEAPSEVADAEGDHKRKLEEVDAGAEANGAGEDAKRPRVEGNGADAVQNSESSEKPEEPVAVITEGAADAEVAPTGDLQTSSEVKPQETATQALPQQQEGDATGALQETTRLIDVPNTKVGVLIGKAGETIRNLQMSSGAKIQITKDADVPSDATTRPVELVGTNESIDKAEQLIKSVIAEAEAGGSPALIAKGFGSGQSGSEQFEMLVPDNKVGLIIGKGGETIKNLQTRSGARIQLIPQHPPAGTTLTERTVRVTGNKKQIEAAKELIKQAMSQTFPRNTTQSGGYGPQHHHPQGHGPASQWGPRSQPQQYGYPPRGPPQNAPYSQPPYGGYPQQPPPRGGMGWDQRQGPPPHQ…
tr|A0A3B6QNG6|A0A3B6QNG6_WHEAT	TraesCS6D02G356600	Uncharacterized protein OS=Triticum aestivum OX=4565 PE=3 SV=1	1.55949	1.55234678124996|1.67407000212748|1.42667181084851|1.72416002364837|1.88771483535296|1.60099617309218|1.38567559282876|1.49482247871814|1.28895823245675	3.84307e-06	MLLSCVLLHALLAGPAEGLVRVPLTKRPVDEDGPVVAGEDAQRLLAWRHGLVYNADVPTTGEKGHAVALKNHLNAQYYGEVGVGTPPQNFTVIFDTGSADFWVPSSKCFLSIGCYLHASYKASKSATYKKNGKRVALRYGTGAISGYLSQDNVQVGGVVVKNQDFIEATREPSITFMFRKFDGILGLGFKEIARGGVEPVWYNMVNQHLVGSPVFSFWFNRHAGEGHGGEIVFGGIDPKHHKEEHKYVPVTKKGYWQFDMGDVLIGGKSTGLCTSRCAAIADSGTSLLVGPTAIITQINEKIGAPGIFSQECKEVASQYRQRILDLLLNEIDPTKICPSVGLCTHSGTQGVSFGIRTVVDDETGRSNDAVCHVCEMAVMWAKNQLAQDQTRDLILKYIN…
tr|A0A3B6MT71|A0A3B6MT71_WHEAT	TraesCS5D02G258900	HATPase_c domain-containing protein OS=Triticum aestivum OX=4565 PE=3 SV=1	1.59762	1.59253292065645|1.81671607910609|1.61923723211148|1.34450762697543|1.5876592329786|1.40793195522542|1.56060958629997|1.77524184805064|1.67415522441305	5.65078e-07	MAPALSRTLGPSSVAALRPSPSRGLLRAALAPQGRRPAGARGVRWEAGRGRLVGARCASAVAEKTAGEEEEAAGEKFEYQAEVSRLMDLIVHSLYSHKEVFLRELVSNASDALDKLRFLSVTDPSVLADGGDMEIRIKPDPDAGTITITDSGIGMTKDELKDCLGTIAQSGTSKFLKALKENKELGADNGLIGQFGVGFYSAFLVAEKVVVSTKSPKTDKQYIWEAEANSSSYVIREETDPEKMLTRGTQITLFLREDDKYEFADPTRIQGLVKNYSQFVSFPIFTWQEKSRTVEVEEEESKEAEETAEGEKEKKKKTITEKYWDWELANETKPIWMRNPKEVEETEYNEFYKKAFNEFLDPLAHAHFTTEGEVEFRSVLYIPGMAPLSNEEIMNPKTK…
tr|A0A1D5YNP5|A0A1D5YNP5_WHEAT	TraesCS5A02G554700	Small nuclear ribonucleoprotein Sm D3 OS=Triticum aestivum OX=4565 PE=3 SV=1	1.64756	1.42896861893634|2.02986407650284|1.92145470332943|1.04893548118899|1.48384690584512|1.41155025771389|1.48039754674335|2.12272968359324|1.9002676560863	0.000242715	MSRSLGIPVKLLHEAAGHVVTVELKTGEVYRGSMIECEDNWNCQIENITFTAKDGKVSQLEHVFIRGSRVRFMIIPDMLKNAPMFKRLEARIRGKGSAIGVGRGRAVAMRARAAGGRGGGPPVGGGRGGAPPVRR
tr|C1KFY5|C1KFY5_WHEAT	TraesCS1B02G041928	Putative omega secalin OS=Triticum aestivum OX=4565 PE=2 SV=1	2.13558	1.72815194888623|2.26682267234612|2.1028140983312|1.91884615988652|2.52255497010153|2.36610202485088|1.81462208942439|2.3962118338963|2.10407176112987	1.34572e-07	MKTFLIFVLAMTMSIITTARLLNPSEQELQSPLQPVPKEQSYPQQPYPSHQPFPTPQQYSPYQPQQPFPQPQQPSPLQPQQPFSQQPQRPQQPFPQQPQQIIPQQPQQPFSLQPQQPVPQQPQRPFGQQPEQIIPQRPQQPFPLQPQQPFSQPQQPFPQQPGQIIPQPQQPFPLQPQQPFPQQPEQIISQQPQQPFPLQPQQPSPQQPQLPFPQPQQPFVVVV
tr|W5HXT5|W5HXT5_WHEAT	TraesCS7D02G335000	Uncharacterized protein OS=Triticum aestivum OX=4565 PE=3 SV=1	1.52861	1.20434904288679|1.71546554826455|1.625901902058|1.07224123356167|1.52924990960677|1.45388574251386|1.37447225001767|1.97592023145077|1.80597035100469	0.000240688	MARGVAAATKGGAGAGKKKGSVTFVIDCTKPVDDKIMEIASLEKFLQERIKVAGGKAGNLGDSVTVARDKSKVTVTSDGAFSKRYLKYLTKKYLKKHNVRDWLRVISSNKDRSVYELRYFNIAENEGEEED
tr|A0A3B6MXE8|A0A3B6MXE8_WHEAT	TraesCS5D02G343300	B box-type domain-containing protein OS=Triticum aestivum OX=4565 PE=4 SV=1	2.38661	2.07446311617565|2.58615749791311|2.68015563314187|1.94054160066816|2.44234748555229|2.52869007182745|2.05029973264485|2.58011270142597|2.59671211110881	2.81547e-08	MWCELASMCAGDGTRERCACALCGAAADVHCEADAALLCAPCDAQVHGVNFLASRHRRTRVWRPMGVDVLSRTATTSRSCVSTADSATTAALRGRGTTPPARRRGARGEAVLEGWARRMGLEAGAAHRRAAAASRAIRVQVAAAAPRVPLRVAMAAALWSEVAAHGVHEPGEALRRLEACAHVPMRLLVEVAAVSTMGDARAKKRTAAVDADEDSWGECSIVSLDKTPSSPRHELLLFV
tr|A0A3B5YUE8|A0A3B5YUE8_WHEAT	TraesCS1B02G144300	60S ribosomal protein L11 OS=Triticum aestivum OX=4565 PE=3 SV=1	1.65912	1.53068879893992|2.05150267258777|1.93296126188415|1.03548318253814|1.39617019696414|1.24271705251073|1.59946035950397|2.15702008447112|1.98607991307494	0.000446572	MIKVQKLVLNISVGESGDRLTRAAKVLEQLSGQSPVFSKARYTVRSFGIRRNEKIACYVTIRGEKAMQLLESGLKVKEYELLRRNFSDTGCFGFGIQEHIDLGMKYDPSTGIYGMDFFVVLERAGYRVSRRRRCKARVGIHQRVTKEDAMKWFQVKYEGVILNKSHAS
tr|A0A3B6AZG4|A0A3B6AZG4_WHEAT	TraesCS2A02G284400	Oxoglutarate dehydrogenase (succinyl-transferring) OS=Triticum aestivum OX=4565 PE=3 SV=1	1.5816	1.74786456511637|1.84769617385482|1.65933315174016|1.40437811813004|1.48724875227653|1.33500124018077|1.58659724084909|1.68976895752161|1.47652911152283	1.40461e-06	MGLFRAASGLARVALRRSLSRAPASPFAGPAPRYFHSTLPRRYAAPEPRAVPLSRLTDSFLDGTSSVYLEELQRAWEADPTSVDESWDNFFRNFVGQAATSPGISGQTIQESMRLLLLVRAYQVSGHMKAKLDPLGLEQRAVPDVLDPAFYGFSESDLDREFFLGVWRMAGFLSENRPVQTLRSVLGRLEQAYCGTIGYEYMHIPDREKCNWLRERIETVNPREYTYDRRQVMLDRLIWSTQFENFLAQKWTTAKRFGLEGAETLIPGMKEMFDRAADLGVESIVIGMPHRGRLNVLGNVVRKPLRQIFSEFSGGTKPVNEGEGLYTGTGDVKYHLGTSYDRPTRGGKHIHLSLVANPSHLEAVDPVVAGKTRAKQYYSNDLDRTKNLGVLLHGDGSFS…
tr|G0Z6F1|G0Z6F1_WHEAT	TraesCS3B02G213500	26S proteasome regulatory subunit RPN11 OS=Triticum aestivum OX=4565 GN=TRAES_3BF102700120CFD_c1 PE=2 SV=1	1.62031	1.61858973972305|1.87849582259705|1.92071793320481|1.32775395618972|1.45740628580334|1.51675555867638|1.63562878473704|1.71515814895052|1.51228981786557	2.1677e-06	MERLQRIFGAGGMGQPPSDSPLLDSSEQVYISSLALLKMLKHGRAGVPMEVMGLMLGEFVDDYTVRVVDVFAMPQSGTGVSVEAVDHVFQTNMLDMLKQTGRPEMVVGWYHSHPGFGCWLSGVDINTQQSFEALNPRAVAVVIDPIQSVKGKVVIDAFRLINPQTMMLGQEPRQTTSNVGHLNKPSIQALIHGLNRHYYSIAINYRKNELEEKMLLNLHKKKWTDGLILKKFDAHSETNEQTVQEMLSLAIKYNKAVQEEDELSPEKLAIANVGRQDAKKHLEEHVSNLMSSNIVQTLGTMLDTVVF
tr|A0A3B6PEF0|A0A3B6PEF0_WHEAT	TraesCS6B02G012500	Uncharacterized protein OS=Triticum aestivum OX=4565 PE=4 SV=1	1.64411	1.6877940091311|1.48896291731178|1.435612879848|1.88007448058585|1.67022905672411|1.60924844079048|1.83488062480821|1.63397089584655|1.55624130366259	1.6376e-07	MQIFVKTPTDRTITLDVESSNTIDNVKAKIHEKEGIPPYQQCLIFIGKHLEDNRTLADYDIKKEFTIYLFPRLEGGMGISVETLYGKVITLQVDPSDTIQAIMAKINDEYGIHPAQQRLIFNKQKLECRYPLMYYDIQNGSTLDLVVCQRPKLMQIFVRNLSGKTLVFQVRSSDTVYSVKEKIHQVEGIDPNEQRLTYGIQLEDDLTLADQDIEEHCTLHLNLRLLSCINCTTNNHSTARKMCHK
tr|A0A3B6PK14|A0A3B6PK14_WHEAT	TraesCS6B02G198600	EF-hand domain-containing protein OS=Triticum aestivum OX=4565 PE=4 SV=1	2.18693	2.38830398222644|2.38660582220438|2.09574309079929|2.06674196706687|2.03909813396628|1.80684192347324|2.44387530016679|2.46514346620002|1.99003350177806	2.60965e-08	MEVAPDLSAVSALALQVDLLQLPPEIPAPGAPALRGVLDHLFAHWLSLPDTVALVSCLAQKAKANGAGFAGGAMLPSMMMQGGANVPPLSPRSPRLSRKPSGVGGHSNRCASPLRPATARAVKEVIPQFYFRDGRPLPYEQKRQCISIVEQLFAGHSNGLRIQEFRMVTRELCKLPSFFTTVLFGKIDKDNTEFVSRDAFMDFWVNSNMMTMDSATQVFTILKQPDHDYLTKEDFKPVLRDLLDNHPGLEFLKSTPEFQERYAETVVYRIFYCLNRIGNGLLSLRELKRGNLLDSLRHADDEEDINKVLRIVDRIFSEVPRKFTSKIPGKMCYEDFVHFILSEEDKSSEPSQDYWFKCIDLDGNGILTHIELQYFFEEQLHRMECMAQEPVLFEDILCQ…
tr|E2F4X3|E2F4X3_WHEAT	TraesCS1D02G285300	30S ribosomal protein S8, chloroplastic OS=Triticum aestivum OX=4565 PE=3 SV=1	1.69314	1.92624553476498|2.02364374558016|1.556132241708|1.24323849443443|1.38021281344187|1.10994429245549|1.85933646416537|2.22238748276549|1.91713490585461	0.000244818	MVRVSVLNDALKSMYNAEKRGKRQVMIRPSSKVIIKFLIVTQKHGYIGEFEYVDDHRSGKIVVELNGRLNKCGVISPRFDVGVKEIEGWTARLLPSRQFGYIVLTTSAGIMDHEEARRKNVGGKVLGFFY
tr|W5FWF5|W5FWF5_WHEAT	TraesCS5A02G170200	Uncharacterized protein OS=Triticum aestivum OX=4565 PE=3 SV=1	1.60487	1.4544778708672|1.93213635354726|1.72732430043652|1.12493875186774|1.41163800361511|1.31441441503734|1.57145568999193|2.10132874010566|1.80609727444196	0.000127825	MATVPAPAAETAASTARTVKDVNPHEFVKAYSAHLKRSGKMELPEWVDIVKTARFKELPPSDADWYYIRAASMARKIYLRQGIGIGGFQKIYGGRQRNGSRPPHFCKSSGAVSRNILQELQKMGIIDVDPKGGRLITSQGRRDLDQVAGTVPAEF
tr|A0A3B6RPJ9|A0A3B6RPJ9_WHEAT	TraesCS7A02G434500	Histone H4 OS=Triticum aestivum OX=4565 PE=3 SV=1	1.86779	1.69717805059681|2.04005299113041|1.9987631150786|1.24192475729067|1.48957447225726|1.46452412266147|2.06436299978652|2.49623482774799|2.31752730223437	5.52021e-05	MSSRGKGGKGLGKGGAKRHRKVLRDNIQGITKPAIRRLARRGGVKRISGLIYEETRGVLKIFLENVIRDAVTYTEHARCKTVTAMDVVYALKRQGRTLYGFDG
tr|C0KEI1|C0KEI1_WHEAT	TraesCS1B02G041928	Omega-gliadin (Fragment) OS=Triticum aestivum OX=4565 PE=4 SV=1	2.26168	1.5591416043769|2.10577236900635|2.50832651992218|1.88529456731368|2.55775547652395|3.05234205707678|1.723450576546|2.34961532706398|2.61345260778564	4.50671e-06	ARELNPSEQELQSPQQPVPKEQSYPQQPYPSHQPFPTPQQYSPYQPQQPFPQPQQPTPIQPQQPFPQQPQQPQQPFSQPQQQLPLQPQQPFPQPQQPIPQQPQQSFPQQPFPQPLQRPEQQFPQQPQQIIPQQTQQPFPLQPRQPFPQQPQRPFAQQPEQIISQQPFPLQPQQPFSQPQQPFPQQPEQIIPQQPQQPSPLQPQQPFSQQPQRPQQPFPQQPQQIIPQQPQQPFPLQPQQPVPQQPQRPFGQQPEQIISQRPQQPFPLQPQQPFSRPQQPFPQQPGQIIPQQPQQPFPLQPQQPFPQQPPQQPEQIISEQPQQPFPLQPQQPSPQQPPHQQLPFPQPPQPFVVVE
tr|A0A7D5RE50|A0A7D5RE50_WHEAT	TraesCS6D02G000200	Monomeric alpha-amylase inhibitor OS=Triticum aestivum OX=4565 GN=MAI PE=3 SV=1	1.59218	1.23622454077974|1.41519148483441|0.726162055337642|2.2721041511102|2.61079400484165|1.34227095443996|1.71675493240248|1.98380151532636|1.02635725137922	0.0184256	MWMKTGFWGLLVFMLVATTMAVEYGARSHNSGPWSWCDPATGYKVSALTGCRAMVKLQCVGSQVPEAVLRDCCQQLADINNEWCRCGDLSSMLRSVYQELGVREGKEVLPGCRKEVMKLTAASVPEVCKVPIPNPSGDRAGVCYWAAYPDV
tr|A0A2X0S6V5|A0A2X0S6V5_WHEAT	TraesCS2B02G329100	Genome assembly, chromosome: II OS=Triticum aestivum OX=4565 GN=CAMPLR22A2D_LOCUS3122 PE=3 SV=1	1.64547	1.54216690415167|1.98344078231679|2.20586359093507|1.10086318501162|1.58122572461802|1.5888058917715|1.38601969280389|1.79524538296805|1.62562793650958	9.57194e-05	MESSYLPATTESIAMAQEAKDASESISILYRVIQDPSSSADALRTKELAITNLTNYLTEESRAEELRNLLTQLRPFFSLIPKAKTAKIVRGIIDAVSKIPGTSDLQISLCKEMVEWTRAEKRTFLRQRVEARLAALLLENQEYTEALTLLTGLIKEVRRLDDKLLLVDIDLLESKLHFSLRNLPKAKASLTAARTAANAIYVPPAQQGTIDLQSGILHAEEKDYKTAYSYFFEAFEAFNALDDPRAIFSLKYMLLCKIMVNQADDVAGIISSKASLKYVGPDVDAMKAVADAYSKRSLKYFETALRDFKAQLEEDPIVHRHLSSLYDTLLEQNLCRLIEPYSRVEIGHVAQMIELAVDDVEKKLSQMILDKKFAGTLDQGAGCLIIFEDQKTEAIFPAT…
tr|W5AVS5|W5AVS5_WHEAT	TraesCS2A02G495800	MPN domain-containing protein OS=Triticum aestivum OX=4565 PE=3 SV=1	1.66002	1.59758994963216|1.81581042601154|1.76983685249503|1.44059146854774|1.62083682840234|1.45180891428112|1.6212720849711|1.93960133041552|1.68278872573899	3.20353e-07	MDVVKAAQLSGRTLEKVVVHPLVLLSIVDHYNRVARDTRKRVVGVLLGTSSRGVVDVTNSYAVPFEEDDKDPRIWFLDHNYHESMFSMFKRINAKEHVVGWYSTGPKLKENDLDVHALFTNYVPNPVLVIIDVQPKELGIPTKAYYAVEEVKENATQKSQKVFVHVPSEIAAHEVEEIGVEHLLRDVKDTTISTLATEVSSKLAALKGLDARLTEIRGYLDLVIEGKLPLNHEILYHLQDVFNLLPNLNVNELIKAFAVKTNDMMLVIYLSSLIRSVIALHNLINNKMLNKEHEKAEDLKPAAVPTAAGS
tr|A0A3B6BY18|A0A3B6BY18_WHEAT	TraesCS2B02G053100	Eukaryotic translation initiation factor 3 subunit M OS=Triticum aestivum OX=4565 PE=3 SV=1	1.58439	1.61801287855045|1.87218347774662|1.6674677409444|1.28954009323341|1.47819273357599|1.33081735502777|1.58191816057696|1.8477431359746|1.57367612877676	5.53126e-06	MATIVNTTEEEPTLAVVRSTAQLAWADAGAEVADPEVARLCAEAQQHALAGRWLDMASLMLANADLLLLAPTAPDKDLECVLTVICNLVTKAGSEDEALEIARLICAKLAHQPGDKPTLRIKVLFSLYNLLPSLSGKALVYRKALELAAAGKAADCVVPTFKNIDAFVAYWGIGKPEQRDLFLAVTRILKDHKGMTKEYFKFLNKYLATFDGSADDADAIGAAKEEAAAAIIEFVKSSDLYQCDLLDMPAVAQLEKDEKYQPVYELLKIFLTQRLDSYLAFQTANSSLLQGYGLVHEECITKMRLMSLLDLSGHCSGEIPYSAITKALEINDDEVEYWIVKAISSKILDCKVDQLNQLVIVRYFMSTRLSWSMLQCYAFLFG
tr|A0A3B6LW24|A0A3B6LW24_WHEAT	TraesCS5B02G477400	Histone H2A OS=Triticum aestivum OX=4565 PE=3 SV=1	1.9469	1.13938809520759|1.58860269232017|1.98726805111614|1.19698453221817|1.60205030831968|1.99110751673479|2.16126464504592|3.05584519631333|2.79958935600784	0.000628383	MGAPVYLASVLEYLAAELLELAGNAAKDNKKSRIIPRHLLLAIRNDQELGKLLAGVTIAHGGVLPNINPVLLTKKTAEKEPKSPKKTAEKEPKSPKKTAEKEPKSPKKA
tr|Q8L804|Q8L804_WHEAT	TraesCS7B02G198400	Putative 40S ribosomal protein S3 OS=Triticum aestivum OX=4565 PE=1 SV=1	1.56525	1.5318016724543|1.71033205351062|1.63039965732968|1.19210936553347|1.33218562043673|1.19526208398431|1.74033622367946|1.9565032248228|1.79831742374384	9.23081e-05	MATQISKKKKFVSDGVFYAELNEMLTRELAEDGYSGVEVRVTPMRTEIIIRATRTQNVLGEKGRRIRELTSVVQKRFNFLENGVELYAEKVVNRGLCAIAQAESLRYKLLGGLAVRRACYGVLRFVMESGAKGCEVIVSGKLRAQRAKSMKFKDGYMISSGQPVNEYIDAAVRHVLLRQGVLGIKVKIMLDWDPKGKLGPTTPLPDLVTIHPPKEENELRPPALVEV
tr|A0A3B5ZS22|A0A3B5ZS22_WHEAT	TraesCS1B02G168600	Cyanate hydratase OS=Triticum aestivum OX=4565 GN=CYN PE=3 SV=1	1.61982	1.69399299715906|1.89199226841776|1.87320447337196|1.21844264541453|1.36803462575325|1.34111718345776|1.62757119922601|1.82272488696892|1.741328030606	2.35677e-05	MEESGASAAAVVPRLLAAKEESGKSFSDIAAETGLTNVYVAQLLRRQAQLKPDMAPAFRAAVPALTDELVELMMRPPFRSYHPDIVHEPAIYRLNEAVMHFGESIKEIINEDFGDGIMSAIDFYCSVDKIQGADGKDRVVVTFDGKYLPYTEQRSEHMMSRLNRNAS
tr|A0A3B6LVN2|A0A3B6LVN2_WHEAT	TraesCS5B02G468500	S5 DRBM domain-containing protein OS=Triticum aestivum OX=4565 PE=3 SV=1	2.12025	1.86830263648873|2.17672959904198|2.32973857711433|1.17714063201884|1.37269123555242|1.47223572295763|2.58182956544374|3.03638542351556|3.06721212059037	0.000318013	MADRGGERGVDRGGFGRGFGRGGRGDRGGRRGGRRGPRQEEEKWVPVTKLGRLVKEGRFTKMEEIYLHSLPVKEHQIVETLCPGLKDEVMKITPVQKQTRAGQRTRFKAFVVVGDSNGHVGLGVKCAKEVATAIRGAIILAKLSIVPVRRGYWGNKIGLPHTVPCKVTGKCGSVTVRMVPAPRGSGIVAARVPKKVLQFAGIDDVFTSSRGSTKTLGNFVKATFDCLMKTYGFLTPDFWRETTFTKAPYQEFTDILAKPTKALMLDAPAEKVEA
tr|A0A1D5SLI4|A0A1D5SLI4_WHEAT	TraesCS1D02G101600	40S ribosomal protein S4 OS=Triticum aestivum OX=4565 PE=3 SV=1	1.5303	1.36300551293493|1.60650849282856|1.5573732606479|1.27733263915758|1.36428195714996|1.46635868685566|1.56812951230875|1.87039666058447|1.6993278580088	5.99493e-06	MARGLKKHLKRLNAPSHWMLDKLGGAFAPKPSSGPHKARECLPLILILRNRLKYALTYREVQSILMQRHIMVDGKVRTDKTYPAGFMDIISIPKTGENYRLLYDTKGRFRLHSVRDEDAKFKLCKVRSVQFGQKGIPYLNTYDGRTIRYPDPLIKANDTIKLDLETNKIVDFIKFDVGNVVMVTGGRNTGRVGVIKNREKHKGTFETIHVEDAQGHQFATRLGNVFTIGKGTKPWVSLPKGKGIKLTIIEEQRKRDAAAQAAAKA
tr|A0A3B6C6H6|A0A3B6C6H6_WHEAT	TraesCS2B02G296700	Eukaryotic translation initiation factor 3 subunit H OS=Triticum aestivum OX=4565 PE=3 SV=1	1.53692	1.62715929676767|1.8348257011886|1.86745098534527|1.16006577029191|1.29781990205565|1.31992370486287|1.46614131390151|1.66492702267928|1.59396741020178	5.729e-05	MANPLAAGGKSFLQAMSTVTEEAAVPLRVVQMEGLAVLKIIKRCEEFAPALVTGQLLGLDVGSVLEVTNCFPFPIREDDEEADADGANYQLEMMRCLREVNVDNNTVGWYQSCLLGSFQTVELIETFMNYQENIRRCVCIVYDPSRSSQGVLALKALKLTDSFMDLYRNNGLTGEKEKKLSWVDIFEEIPIKVSNSALVSAFMKELEPESPVSQCDFDRLKLSTAPFMERNLEFMIGCMDGLSSEQNKFQYYYRNLGRQQSQQQAWLQKRRQENMSRKAAGEEPLPEEDPSNPIFKPLPEPSRLEGYLVTNQISSYCNHINGVAGQSFNRLYLMKALQED
tr|A0A3B6HWQ2|A0A3B6HWQ2_WHEAT	TraesCS4A02G178700	SOR_SNZ domain-containing protein OS=Triticum aestivum OX=4565 PE=3 SV=1	2.31979	2.64423725715315|2.84987821004157|1.92526986232922|1.92930407029267|2.11399123961173|1.4214554557282|2.82051863778468|3.06850561663586|2.10495990834987	9.7498e-06	MASDGVVALYGNNKAVVEPSAKPAAATFSVKVGLAQMLRGGVIMDVVTAEQARLAEEAGACAVMALERVPADIRAQGGVARMSDPALIRDIKRAVTIPVMAKARIGHFVEAQILEAIGVDYVDESEVLTLADDAHHINKHNFRVPFVCGCRDLGEALRRIREGAAMIHTKGEAGTGNVVEAVRHVRSVMGAVRALRNMDEDEVFSYAKQIAAPYDLVMQTKQLGRLPVVQFAAGGVATPADAALMMQLGCDGVFVGSGIFKSGDPARRARAIVQAVTHYSDPEILANVSAGLGEAMVGINLSDPNVERFAARSQ
tr|A0A3B6RS92|A0A3B6RS92_WHEAT	TraesCS7A02G529900	HATPase_c domain-containing protein OS=Triticum aestivum OX=4565 PE=3 SV=1	1.62434	1.78042193787496|1.66010571276503|1.47886052377948|1.70925047270684|1.60072505659078|1.42633064438922|1.79318792091589|1.68838061906941|1.48181996114251	1.37395e-07	MRKWALSCALLLVLLLTTLPDPAKKLQVNAEESSDEVGDFPKVEEKLGAVPHGLSTDSEVVQRESESISRKTLRNSAEKFEFQAEVSRLMDIIINSLYSNKDIFLRELISNASDALDKIRFLTLTDKEALGEGDTAKLEIQIKLDKENKILSIRDRGVGMTKEDLIKNLGTIAKSGTSAFVEKMQTGGDLNLIGQFGVGFYSVYLVADYVEVVSKHNDDKQYVWESKADGSFAISEDTWNEPLGRGTEIKLHLRDEAKEYLEEGKLKDLVKKYSEFINFPIYLWATKEVDVEVPADEEESSEEEESTTERTEEEETEDDEEKKPKTKTVKETTTEWELLNDMKAVWLRSPKEVTEEEYAKFYHSLAKDFGDDKPMTWSHFSAEGDVEFKALLFVPPKAP…
tr|W5D700|W5D700_WHEAT	TraesCS3B02G109200	Uncharacterized protein OS=Triticum aestivum OX=4565 GN=TRAES_3BF070600020CFD_c1 PE=3 SV=1	1.89849	1.92703900881344|1.94599858513028|1.77507966066524|2.03015873306878|2.04676504660609|1.86844068141718|1.89109586829927|1.9263265537699|1.67554705745868	1.43684e-09	MSSSDDACGKKASWPELVGKSIEEAKKIIMKDRPDVKIIEVFPVGTAVTEDFRPDRVRIFVDTVAETPRIG
tr|A0A3B5Y4G7|A0A3B5Y4G7_WHEAT	TraesCS1A02G344000	ATP-dependent 6-phosphofructokinase OS=Triticum aestivum OX=4565 GN=PFK PE=3 SV=1	1.50363	1.3946811299267|1.64574131359171|1.54293717170497|1.39758062306826|1.51979957983376|1.42326444109281|1.45672994648885|1.67626855926438|1.47565826031265	8.81049e-08	MASHIILPPDGDDDEQQRREDEENDGGGSGSGGDGEQQQQGGGNAKAALPFSAMCVRISRDSYPNLRALRNASHASLTDAAYVKISEGDFGYVLDDVPHLADYIPDVPTYPNPLQDHPAYSTVKQYFVNEDDTVPQKVVVQKNSRRGVHFRRAGPRQRVNFESDEVKACIVSCGGLCPGLNTVIRELVCGLAHMYNVNNIFGIQNGYKGFYSSNYVAITPKTVNDIHKRGGTVLGTSRGGHDTKKIVDNIQDRGINQVYIIGGDGTQKGAYEIYKEIRKRGLKVAVAGVPKTIDNDIAIIDKSFGFDSAVEEAQRAINSAHVEACSAENGIGLVKLMGRYSGFIAMYATLASRDVDCCLIPESPFYMDGEGGLLQYVERRLKENKHMVIVVAEGAGQDI…
tr|A0A3B5Z5P9|A0A3B5Z5P9_WHEAT	TraesCS1B02G473400	DNA damage-binding protein 1 OS=Triticum aestivum OX=4565 PE=3 SV=1	1.60597	1.67545325536622|1.81442301418386|1.76037664970166|1.36565018581172|1.44873955805531|1.43054039085448|1.60812241417199|1.75517931314802|1.59528474498838	7.31537e-07	MSTWNYVVTAHKPTSVSHSCVGNFTGPHQLNLIVAKCTRIEIHLLTPQGLQPMLDVPIYGRIATIELFRPHNEAQDFLFVATERYKFCVLQWDAEKSELLTRSMGDVSDRIGRPTDNGQIGIIDPDCRLIGLHLYDGLFKVIPFDNKGQLKEAFNIRLEELQVLDIKFLYGCLRPTIVVLYQDNKDARHVKTYEVALKEKDFVEGPWSQNNLDNGAGLLIPVPAPLGGVIIIGEETIVYCNANSTFKAIPIKQSITRAYGRVDPDGSRYLLGDNSGILHLLVLTQERERVTGLKIENLGETSVASSISYLDNGVVYVGSRFGDSQLVKLNLQPDATGSFVEILERYVNLGPIVDFCVVDLDRQGQGQVVTCSGAFKDGSIRVVRNGIGINEQASVELQG…
tr|Q9SWU1|Q9SWU1_WHEAT	TraesCS5A02G443900	Histone H1 WH1A.3 (Fragment) OS=Triticum aestivum OX=4565 PE=2 SV=1	1.53628	1.57636684504467|1.54587772229271|1.29929377041879|1.53234419589743|1.52250267337074|1.27535830318015|1.79377826391112|1.77565532954997|1.5053685915745	4.4374e-06	PVPQVEVAADAAVDTPAASAKAPKAAKAKKSTGPKKPRVTPAHPSYAEMVSEAIAALKERSGSSTIAIAKFIEDKHKAHLPANFRKILLTQIKKLVAAGKLTKVKGSYKLAKAPAAVKPKTATKKKPAAKPKAKAPAKKTAAKSPAKKAAAKPKAKAPAKAKAVAKPKAASKPKAAAKPKAKAAAKKAPAAATPKKPAAARKPPTKRATPVKKAAPAKKPAAKKAKK
tr|W5FPA7|W5FPA7_WHEAT	TraesCS5A02G104000	30S ribosomal protein S4, chloroplastic OS=Triticum aestivum OX=4565 PE=3 SV=1	1.56079	0.92139108044688|1.27297321280772|1.42866420132479|1.00828325663652|1.37279785861142|1.55531184642182|1.71433720758756|2.39080190475895|2.38256409709554	0.0072364	MVHVNFYRNYGKTFKKPRRPYEKERLDAELKLVGEYGLRCKRELWRVQYALSRIRNAARHLLTLDEKNPRRIFEGAALLRRMNRYGLLAEGQDKLDYVLALTAENFLARRLQTLVFKAGMAKSIHHARVLIRQRHIRVGRQIVNVPSFMVRVESEKHIDFSLTSPFGGGPAGRVKRKNQKKASGGGDAGGDEEEE
tr|W5FSM8|W5FSM8_WHEAT	TraesCS5B02G167100	Uncharacterized protein OS=Triticum aestivum OX=4565 PE=3 SV=1	1.80444	1.6926631116082|1.9365333751959|1.75166013942376|1.38485507325538|1.55672118071283|1.41446543444006|2.13133566154485|2.36216365428567|2.00956135133461	1.36886e-05	MVKYSTDPANPTKSAKAMGRDLRVHFKNTRETAFALRKMSLNKAKRYLEDVLAHKQAIPFRRYCRGVGRTAQVKNRQPNGQGRWPAKSAKFVLDLLKNAESNAEVKGLDVDALYISHIQVNQAQKQRRRTYRAHGRINPYMSNPCHIELILSEKEEPVKKEAESQIARKA
tr|A0A077RW85|A0A077RW85_WHEAT	TraesCS3B02G365900	Uncharacterized protein OS=Triticum aestivum OX=4565 GN=TRAES_3BF027700130CFD_c1 PE=4 SV=1	1.55263	1.54963359094916|1.54290329361471|1.42726195878979|1.50710544056253|1.45259744446031|1.40125724751483|1.7519979396606|1.77873954561953|1.56221792588041	2.75607e-07	MADQLSEEQIGEFKEAFSLFDKDGDGSITTKELGTVMRSLGQNPTEAELQDMINEVDADGNGTIDFPEFLNLMARKMKDTDSEEELKEAFRVFDKDQNGFISAAELRQVMTNLGEKLSEEVEEMVREADVDGDGQINYDEFVKVMMAK
tr|A0A3B6SF99|A0A3B6SF99_WHEAT	TraesCS7B02G136800	COP9 signalosome complex subunit 6 OS=Triticum aestivum OX=4565 PE=3 SV=1	1.6135	1.7261550713107|1.97914307782969|1.70940983943455|1.32088381845889|1.50555981109372|1.30895211643004|1.59514958882211|1.84835381483353|1.52786979415377	8.54616e-06	MSTPSDPAASAQPPSTAATSSSGLTFKLHPLVIVNVSDHYTRVKAQASFTAEAPSPGKAQASCSAEGSSAPAEPPRVFGCVIGVQRGRTVEIFNSFELVLDPVTGTLERAFLEKKLELYKKVFPEFYVLGWYSTGSDVQDTDILIHKALMDINESPVYLLLNPAINHSQKDLPVTIYESELHVIDGGPQLIFVKSNYTIETVEAERISVDHVAHLKPSDGGSAATQLAAHLTGIHSAIKMLNSRVRVIQQYLGAMQKGDFLTEYNDTLLMTYLAMFTNCSSTMNELVEKFNTTYERSPARRGGRGAFM
tr|A0A3B6DMP1|A0A3B6DMP1_WHEAT	TraesCS2D02G576800	LisH domain-containing protein OS=Triticum aestivum OX=4565 PE=3 SV=1	2.79997	2.58676073365705|2.73490027029664|2.83450066956172|2.54349908878279|2.7005207234259|2.76946368002207|2.9153548582884|3.08425957648883|3.03044222832836	4.87041e-11	MEPEQPAADPAAAEPEDEEEEEEEEETEAPDAEQEAAEDEEDALLDRAQALISRVVEQESNPNPRLIHTLATMCEVQEARHLQECASDPSFNNTNTRGSHTIGKLASLIRENDDFYDLVFSKFLSDTSYPLPVRCASARLLLSIQDAFSPQFSHPFEDATLENIKSWIKEDGEASDECDWKHLGSGKKPTDTEMMRTYAIGLLSMALYGGGRLVEDVLNMGVSAKLMRFLRIRVFGDATSPEKDANLPLDTKHPRGRDENRGKVRLLQDSSILDGTRAGDGISTDPTLEKQFDRDVGMRQAHGEQGMDDTGYLLRDDVDSTMDPFDAKSVDGEKYPAGESLRDELLKRKFSRTGSRLRGKIKPGEGLPESERTPLSPTGLRMGSRTSKEKNAAKVEDPK…
tr|A0A3B6H2M0|A0A3B6H2M0_WHEAT	TraesCS3D02G517900	Uncharacterized protein OS=Triticum aestivum OX=4565 PE=3 SV=1	1.6767	1.40570653247348|2.37036133862817|1.85478990411743|0.765961560144613|1.30379323265416|1.01870514939614|1.5820447943043|2.6928411773634|2.09612192685215	0.0107921	MPKQIHEIKDFLLTARRKDARSVRIKRTKDAVKFKVRCSRYLYTLCVHDTDKANKLKQSLPPLNVQEV
tr|A0A3B6C0D4|A0A3B6C0D4_WHEAT	TraesCS2B02G129300	Uncharacterized protein OS=Triticum aestivum OX=4565 PE=3 SV=1	1.54884	1.29633415405853|1.8036254935486|1.72470757294399|0.993173728470983|1.39214796822663|1.33040439976711|1.44949313570297|2.03571807881505|1.91392593637043	0.000609752	MARGTAATAAAAAKGKKKGSVSFVIDCTKPVEDKIMEIASLEKFLQERIKVAGGKAGNLGDSVTVTRDKSKVTVTSDGAFSKRYLKYLTKKYLKKHNVRDWLRVIAANKERNVYELRYFNIAENEGEEED
tr|A0A3B6PIA4|A0A3B6PIA4_WHEAT	TraesCS6B02G137700	Protein arginine N-methyltransferase OS=Triticum aestivum OX=4565 PE=3 SV=1	1.55873	1.83375491182009|1.76909488132851|1.78734474620066|1.34687122617294|1.31115323022707|1.32233517242355|1.57758124536035|1.53629151617481|1.54415024648015	9.05934e-06	MPLGQRAGDKSDSRYCGVEVLDFPAGDGLPAVLTHSLSSAFDFLLAPLVDPEYRPTPGAVLPVAASDLVLSPSQWSSHIVGKISEWIDLDSEDEQLRLDSELTLKQEIAWATHLSLQACVIPPPKRSTCANYARVVNNILQGLTNMQLWLRIPLEKSESMDEDRGKSETVDSWEWWNSFRLLCEHSSQLYVALDILSSLPSMNSLGRWFGEPVRAAILQTDAFLTNARGYPCLSKRHQTLLTGFFNHSVQVIISGRSNHNVSQVSEGVLSGDENHTEDTPTRHALSPYLEYMAYLYQRMDPLPEQERFEINYRDFLQSPLQPLMDNLEAQTYETFEKDTVKYTQYQRAIAKALVDKVSEDEVSTTRTVLMVVGAGRGPLVRASLQAAEETGRKLKVYAV…
tr|A0A3B5ZUA2|A0A3B5ZUA2_WHEAT	TraesCS1D02G161300	Katanin p80 WD40 repeat-containing subunit B1 homolog OS=Triticum aestivum OX=4565 PE=3 SV=1	1.56442	1.72840678544803|1.5177621790543|1.38374722447171|1.84909588249658|1.51040492819965|1.42106550197605|1.81092995814396|1.60741320717012|1.25096342562423	7.73446e-06	MHLQLQVSVTTLLQSLSGHTSPVESLSFDSSEVMIGAGAATGTIKIWDIKEAKVVRTFTGHRSNCASLDSHPFGEFFASGSSDTNMKIWDMRKKRCIHTYQGHTGRIDVLRFTPDGRWIVSGGADSSVKIWDLTAGKLLHDFRLHEGPINCLDFHPHEFLLATGSADKTVKFWDLETFELIGSSGPENYREYYMPASVVRSMTFNSDGKALFCGLHENLKVLSWEPIICHDAVDVGWSTLADLNVQEGKLLGCSYNQSCVGIWVVDLMKFDPYTVGSAEAFWNGTGNGPLQADNSISSMLGSLSISRRPEANETPSSTLLKRPMSMSKETSVPVSSAVRKRLSKAPGINNLRLTRAESAPLLSPRVRLKPNSTDHQKRHIANVRFKVDLSTSARMIAGN…
tr|A0A3B6QHV5|A0A3B6QHV5_WHEAT	TraesCS6D02G203300	GrpE protein homolog OS=Triticum aestivum OX=4565 PE=3 SV=1	1.88536	2.02813743304607|2.26079143264449|2.08820737917965|1.35748790418184|1.62047209863863|1.53469368431065|1.85692014632473|2.21967396862615|2.00184922224105	5.81798e-06	MAALLRTAAALAPRPSPARESPRRPCAASLACSRRPPVRSLRAQLLTTRRAPGHVASRLRRLGATEADESAQTATQEDTETEVTGDTLADDASAGTEETLSVLITALQSYKEALMNNDEAKVAEIESFLLSIEDEKNSLMSKITALDAELTTERDRILRIGADFDNYRKRTEREKLSLMTNVQGEVVESLLPVLDNFERAKTQIKVETEREAKINDSYQSIYKQLVEILNSLGVEDVETVGKPFDPMLHEAIMREESVEYEDGVVLQEFRKGFKLGERLLRPAMVKVSAGPGPEKSGDDDTTIGEDSVGPQAFDDGEDDGFDDADAE
tr|W5B985|W5B985_WHEAT	TraesCS2A02G364000	Proliferating cell nuclear antigen OS=Triticum aestivum OX=4565 GN=CAMPLR22A2D_LOCUS3649 PE=3 SV=1	1.75931	1.83272088660312|1.86718172968866|1.75283592164014|1.67828008412881|1.71685188413903|1.61039396556323|1.81351203980296|1.85972243809237|1.70231031165206	7.65276e-10	MLELRLVQGSLLKKVLEAIKELVTDANFDCSGTGFSLQAMDSSHVALVALLLRSEGFEHYRCDRNLSMGMNLGNMAKMLRCAGNDDIITIKADDGSDTVTFMFESPNQDKIADFEMKLMDIDSEHLGIPDSEYQAIVRMPSSEFSRICKDLSSIGDTVIISVTKEGVKFSTAGDIGTANIVCRQNKTVDKPEESTIIEMQEPVSLTFALRYMNSFTKASPLSDQVTISLSSELPVVVEYKIGEMGYIRFYLAPKIEEDEEMKA
tr|A0A3B6HQ62|A0A3B6HQ62_WHEAT	TraesCS4A02G006000	40S ribosomal protein SA OS=Triticum aestivum OX=4565 PE=3 SV=1	1.97783	2.1752910595008|2.96035002710032|2.27541478531958|1.33872770125615|1.83218620330679|1.37816003386069|1.72400733766566|2.38103039961759|1.73529687957876	6.85795e-05	MAAAAGEAPRALSQKEQDIQMMLAADVHLGTKNCDFQMERYAYKRRSDGIYIINLGKTWEKLQLAARVIVAIENPQDIIVQSARPYGQRAVLKFAQHTGANAIAGRHTPGTFTNQMQTSFSEPRLLILTDPRTDHQPIKESALGNIPTIAFCDTDSPMRYVDIGIPANNKGRNSIGCLYWLLARMVLQMRGTILPGHKWDVMVDLFFYRDPEEAKEQEDEAAGAPEYAAITDYGAAAGQWGGDQWTSDAPAPPPVTAPVAGGDGWDAAGAPVAVEGAVPAPVVAATGWDAAVQPPAQGWE
tr|A0A3B6NLB1|A0A3B6NLB1_WHEAT	TraesCS6A02G071000	Uncharacterized protein OS=Triticum aestivum OX=4565 PE=3 SV=1	1.78201	1.69041331199589|2.0250479416122|1.9776766852523|1.61920409376676|1.93955646468792|1.90059592429645|1.46301480413031|1.76914401801454|1.65346635767705	2.60231e-07	MGDAKSSWPELLGAPSEVAKQKILSDRPDVRVFVVPVGNNVTGDFNDKRVRVFVNTRGDVARVPNIG
tr|A0A3B5YX52|A0A3B5YX52_WHEAT	TraesCS1B02G206600	Uncharacterized protein OS=Triticum aestivum OX=4565 PE=4 SV=1	1.80298	2.03957666089039|2.12173885351529|1.16911178855834|2.16348481765153|2.27386698162719|1.25088977802101|1.9757646424062|2.0747184559942|1.1576480862257	0.000414227	MEQQPVAAAAAAEPEVPAGLGLTAAEYAQLLPTVEAYHRYAVGPGQCSSLVAQRIEAPPAAVWAIVRRFDCPQVYKHFIRSCALRPDPEAGDELRPGRLREVSVISGLPASTSTERLDLLDDARRAFGFTITGGEHRLRNYRSVTTVSELSPAAPAEICTVVLESYVVDVPDGNSEEDTRLFADTVVRLNLQKLKSVAEANAAAAATTAPPAE
tr|C1KDF4|C1KDF4_WHEAT	TraesCS1B02G041928	Putative omega secalin OS=Triticum aestivum OX=4565 PE=2 SV=1	4.11627	3.00830577568887|3.53221589288258|3.76359869614796|4.48558345429008|5.3344326583233|5.67166448990372|3.29687456534649|3.90750693607674|4.04620866079881	4.33291e-08	MKTFLIFVLAMTMSIITTARQLNPSEQELQSPQQPVPKEQSYPQQPYPSHQPFPTPQQYSPYQPQQPFPQPQQPVPQQPQRPFGQQPEQIISQRPQQPFPLQPQQPFSQPQQPFPQQPGQIIPQQPQQPFPLQPQQPFPQQPEQIIPKQPQQPFPLQPQQPSPQQPQLPFPQPQQPFVVVV
tr|A0A3B6QG76|A0A3B6QG76_WHEAT	TraesCS6D02G162700	Glycosyltransferase OS=Triticum aestivum OX=4565 PE=3 SV=1	1.72834	1.75900019946359|1.73975820686412|1.86093827478893|1.49470924065449|1.46652769218766|1.56378647918807|1.90166266481648|1.8946646620882|1.87405105970446	2.94345e-07	MGEEAPAAVTAAATSPAPHLLLICFPGQGHVNPMLRLAKRFAAKGLLVTFSSTSYVGGKITASSGVEAGGDGVPLGRGRIRFEFLDDDFDGNDLDDLMRHLETTGPVVFAELLRRQEEAGRPVTCVVGNPFLPWAIDVAHDAGIPTAVLWVQSCAVFSLYYHHVHGLVEFPPEDDLDARVNLPGLPALSVADVPSFLLPSNPYKLLTDAILKQFRTIHKASWVFVNSFYELEPDVVDALPGISPPPPPLIPVGPLVELEEEGAVRGDMIKAADDCVGWLDAQAPRSVVYASLGSVVVLSAEELAEMAHGLASTGRPFLWVVRPDCSAMLPEGYLDSVAGRGMVVPWSPQDLVLAHPSTACFLTHCGWNSTLETLAAGLPVVAFPQWGDQCTDAKYLVEE…
tr|A0A3B6SF50|A0A3B6SF50_WHEAT	TraesCS7B02G131900	Uncharacterized protein OS=Triticum aestivum OX=4565 PE=4 SV=1	1.58364	2.06404332323215|1.84784340667867|1.57206741752037|1.17856831521653|1.49650978152341|1.275292400201|1.82867451361643|1.63943525032094|1.35029849036558	9.51872e-05	MEVLCIGTADTKLEELLFLATCLRSSLAASASVPKVKVSIVDVSTTKTVPTQDSEDIAVIARDTVLSCYPDSSQQDLPDDRGEAIALMSKALQSFLKNRYEAGTLVAAVGLGGSGGTALIAPALRSLPLGVPKLIVSTVASGNTAPYVGTSDLVLFPSVVDICGINSVSRVILSNAASAVAGMVYGILMASNESDETDTKLTVGITMFGVTTQCANAVKDRLNKEGYETLVFHATGVGGKAMEELVRGGFIQGVLDITTTEVADYIVGGIMACDETRFDAAIDKKIPLVLSVGALDMVNFGAHDTIPAAFLDRKIHIHNEQISLMRTTLEENKKFAQFIADKLNKSLSTVTVCLPQKGISAIDAPGMPFYDPEATSALLDELNTRLVKTENRQVKLLPY…
tr|A0A3B6PLL9|A0A3B6PLL9_WHEAT	TraesCS6B02G227700	Uncharacterized protein OS=Triticum aestivum OX=4565 PE=3 SV=1	2.0367	2.10535476231546|2.18100108351338|2.00085902443366|1.60422347545379|1.56611350593622|1.45833792813413|2.61974703657741|2.44799355361637|2.34669683840246	9.72776e-06	MTAPADKGKKAKTDTDVGEENEQIDGALVLSIERLQEIQDELEKVNEEASDKVLEVEQKYSEIRRPVYLRRCDIIKTIPDFWLTAFLSHPLLSELLTEEDQKMFKYLESVDVDDSKDVKSGYSITLNFSENPYFEDRKLTKSYAFADDGTTTINATSIKWKEGMEINGNAIKKKGSKRPLVEESFFTWFTDTEHKSLADGVQDEVAEIIKEDLWPNPLKYFNNEVEEFEGDDEDEEGSDGEDAEEDDDEEN
tr|A0A3B5Z300|A0A3B5Z300_WHEAT	TraesCS1B02G376800	Formylglycinamide ribonucleotide amidotransferase OS=Triticum aestivum OX=4565 PE=3 SV=1	1.65899	2.18207469019655|2.03329345009833|1.83261150495123|1.58941461836215|1.4068200178862|1.29890458037347|1.70297913195294|1.60181296522917|1.2829570489846	4.99996e-05	MLKWQQAICYVFQAFLVIWENKGVVLYPQDTHLREVSSGVNSPLIEASGDDMGLVSRIIHFYRKPFLQESEAKELLRKVQAKVSSNIIDIKTEQCFNVELEDALGSTKLATLQWLLAETYEPDNLQTGSFLEEEVSRSPYCFLVEVGPRMTFSTAFSTNAVSICKALSLMEVTRLERSRRYLLCLQPGSDPLDESQLNSFAALIHDRMTECVYPSKLTSFRSDVVPEPVSVIPVMEKGREALEEINLKMGLAFDEQDIKYYTHLFRDDIKRNPTTVELFDIAQSNSEHSRHWFFNGKLEIDGETMPSTLFQLVKSPLKANPNNSIIGFKDNSSAIKGTLVNHLRPALPGSTSPLSLMMRELGILFTAETHNFPCAVAPYPGAETGAGGRIRDTHATGKG…
tr|A0A3B6I532|A0A3B6I532_WHEAT	TraesCS4A02G402900	DUF4220 domain-containing protein OS=Triticum aestivum OX=4565 PE=4 SV=1	3.22246	1.17828258189868|1.9307067755516|0.595495738031355|6.30764416692233|10|3.22430131593413|1.81604395330531|3.00376043647366|0.945898974202602	0.0277826	MSSEKGGGVILVTLRSLFTLDNATRIASVELWVLLTTVLLVWRFVLDFSGPWFGKPSRMFQVLTLEILTQNLVIYTIGLMQLSGARVNDYFQVWAVLLVTLQYSVKIGRPYSRSKQIPLLDLMSSFWAANLLRVQTFYLLRIPLWLIWSLNVVRIIVLFVTSGKAETHSQESMRLVNDYMSYEDRLPPAADLAVSSMSGRKYLVHGEHRVLKEVQEGRRREGSCFRRKRVTKQAGRSYKIELKPDGDHSNHFVTVEKIWSHTSGSGLLGAAADPRGERKDLCLSFALYKLLRRRFFDLPVHEATRPRGKDKIRELVFGYILADCERAFRITGVELSFLQDLFHSKHATVFAGGLMVPLRSLLLSLAMAAATGYIAYTARYIPERMDPADRNRITHGVFV…
tr|A0A3B6QHJ7|A0A3B6QHJ7_WHEAT	TraesCS6D02G195300	PCI domain-containing protein OS=Triticum aestivum OX=4565 PE=4 SV=1	1.98075	2.2488314414222|2.35179038255215|2.13209219085076|1.71336246353812|1.80682446290797|1.62934892768326|1.98668657501221|2.09120453767102|1.8666232337649	2.06006e-07	MDGGGGGGSTSGDDGKQEKHLVLAHKLFLLSHPDVDDLSKVDLRSDVLSAVKSDDMAPLFESLAAAGVLEPDAVLLSEMRARIDEEIRKLDEKIADAEENLGESEVREAHLAKSLYFVKVGEKEKALEQLKVTEGKTVAIGQKMDLVFYTLQIGLFYMDFDLISKSVDKAKKLFEEGGDWERKNRLKVYEGLYCMATRNFKKATSLFLDSISTFTTYELFPYDTFIFYTVLTSIISLDRVSLKQKVVDAPEILAVISKVPHLSEFLNSLYNCQYKSFFVAFSGLTEQIKLDRYLQPHFRYYMREVRTVVYSQFLESYKSVTMEAMASAFGVTVDFIDQELSRFIAAGKLHCKIDKVAGVLETNRPDERNAFYQSTIKQGDFLLNRIQKLSRVIDL
tr|A0A3B6HPW4|A0A3B6HPW4_WHEAT	TraesCS4A02G096200	tRNA (guanine(26)-N(2))-dimethyltransferase OS=Triticum aestivum OX=4565 PE=3 SV=1	1.57643	1.65517510953365|1.73097387207805|1.84333796527601|1.41966743184881|1.49095362280878|1.58868923491889|1.41435080351725|1.49305486436364|1.55171069420819	3.70427e-07	MGEVEDMLKDYEIKKEGEAEILMLASNAVFFNPVQVHNRDMSIAVLRTFVAKRKEEYEELMNKRNNKSHKKGNQVETPVVNGDTALTSQHDEIGVVHEKETNQATNEIEDLSKEETKTPSRKVTRELKPPIVLEALAASGLRSLRYAREVDGLGKVVALDNDKASIEACKRNIKFNGASAISKVEAHLADARVYMLTHPKEFDVVDLDPYGSPSIFLDSAVQAVADGGLLMCTATDLAVLCGTNGEVCYSKYGSYPVKGKYCHEMALRILLACIESHANRYKRYIVPVLSVYMDFYVRVFVRVFTSASEIKNTPLKLSYVYQCAGCDSFHLQSLGRTVTKNNSLKHAPGIGPVVPQECSDCGKKFNVGGPIWSAPIHDQDWVLSTLTDVRQMKDRYPAY…
tr|A0A3B6K9P2|A0A3B6K9P2_WHEAT	TraesCS5A02G024100	Glutathione transferase OS=Triticum aestivum OX=4565 PE=3 SV=1	1.93649	1.07272735084267|1.48302624316688|1.60784251844242|0.919300250653546|1.1308851472518|1.29354335135788|2.94440395154731|4.10893271441591|2.86775355342174	0.0161816	MAPMKVYGWAVSPWMARVLVCLEEAGAEYDFVPMSRNGGDHRLPEHLARNPFGEIPVLEDGDLTLYQSRAIARHILRKCKPEFLGAGSLKESAMVDVWVDVDAHQLEPVLKPIVFNCIINPFVGRDVDQGLVDESVEKLKKLLEVYEARLSSNKYLAGDFVSFADLTHFSFMRYFMATEHAVVLDVYPHVKAWWEALLARPSVKKVIAGMPPDFGFGSGNIP
sp|P05621|H2B2_WHEAT	TraesCS1A02G368000	Histone H2B.2 OS=Triticum aestivum OX=4565 PE=1 SV=2	1.63185	1.88783460326372|1.50393526486768|1.48886080614264|1.61808099552352|1.31261638679919|1.29231514722512|2.13344434698464|1.71589067934517|1.73366530404518	2.29103e-05	MPBKKPAAENKVEKAAEKTPAGKKPKAEKRLPAGKTASKEAGGEGKTRGRKKGSKAKKGVETYKIYIFKVLKQVHPDIGISSKAMSIMNSFINDIFEKLAGESAKLARYNKKPTITSREIQTSVRLVLPGELAKHAVSEGTKAVTKFTSS
tr|A0A3B6MTR9|A0A3B6MTR9_WHEAT	TraesCS5D02G238100	Peptidyl-prolyl cis-trans isomerase OS=Triticum aestivum OX=4565 PE=3 SV=1	1.63491	1.88544802957613|1.76676631620107|1.75742773654329|1.6258729708201|1.52966351321058|1.52242549618246|1.61276743041407|1.52548642498857|1.48834130612729	1.06056e-07	MGKDGKGKEAKGKGKQAAGSSDDAGGGKGGKGKGKGGKGGDDLGTCTFVKARHVLCEKQGKINEAYKKLQEGWLDNGDKVPPAEFAKVAQEFSECPSGKKGGDLGWFPRGKMAGPFQEVAFNTPVGATSAPFKSTHGYHFILCEGRKN
tr|W5FVL1|W5FVL1_WHEAT	TraesCS5B02G278700	Uncharacterized protein OS=Triticum aestivum OX=4565 PE=3 SV=1	1.80409	1.22568476085109|1.30505817778608|1.29933393275147|2.4584885500192|2.6386945350236|2.62629807321884|1.49894188799999|1.61104601745724|1.57327926035852	0.000825133	MAVPILKTAIVKKRVKHFKRAHSDRYIGLKQSWRRPKGIDSRVRRKFKGCTLMPNIGYGSNKKTRHYLPNKFKKFVVHNVSELELLMMHNRTYCAEIAHNVSTQKRKAIVERAAQLDVVVTNKLARLRSQEDE
tr|A0A3B6AP33|A0A3B6AP33_WHEAT	TraesCS2A02G003600	NB-ARC domain-containing protein OS=Triticum aestivum OX=4565 PE=4 SV=1	3.26401	3.83776999035816|4.28655883576203|2.96891160814759|2.69975746068078|2.91836884025602|2.06412557489187|3.78543061035306|4.2679293424857|2.54725120974278	8.03802e-07	MELLLVKATLENAARKEISGPAMEELLQRLRDSAHNAQDLLNELDYFRIHDQLHGTYNAADQHDKGGVHDLALNARHTAKAVGKSVSCCPWQRAKRRQQRSRGDSSPAPAPDANQEASGCMPKLGNLLPCSSSQDPHVREEDCGSVQETPKLEFSRVDFSQKIKDIVDKLQPVRKDVNGLLQSCGPRSVPNIAQCRPVTRGRIDEPKLYGRDRVMNSIIHDITKGQYCDKALTVLPVVGSGGMGKTTLIQHIYRSQQVLDHFPVMIWICVSLNFSLDKVLEQIKTCTSEVENEKKSSTTEELIEQRLKSKRFLLVLDDIWQISNEDDWGKLLLTLNKSQENGSMILVTTRFQAIVEKVKATGHSIKLDGLESEDFRKLFLTFVFGDEQCPRDKHFLLDT…
tr|A0A3B6DCQ5|A0A3B6DCQ5_WHEAT	TraesCS2D02G258500	Uncharacterized protein OS=Triticum aestivum OX=4565 PE=4 SV=1	1.84512	1.85426880970457|1.96025765205547|1.88263593868805|1.72007769443201|1.74158402938879|1.73466849129913|1.9342629717513|2.03725499230217|1.74103364042054	2.06042e-09	MDSSSDNFVAPVDERQDPPLPNPSEEEAGGEEKERGEEKTLERAEELFDKGSKAIEEGDFVVAVDRLSRALEIRVERYGELASECASTYYKYGCALLYKSQEETDPLGNVPKSAPDEEPAKSTTNKDSGNSKASSSNVKDDDPSSDKGGLEGQNSNEKDQEDVDGESDKDGDEMGGEEDDSDLDLAWKMLDIARAIVEKNPDNTMEKVKIFSALAEVSMEREDIDNSLGDYFKALAILEHLVEPDHRRIVELHFRICLVYELASKIADAIPYCAKAVSLCKSRLESLKKAKATLLADKGDSASTADGDSKKLSIEDELEVVTGILPDLEKKLEDLEQAMATPSSEIEEIMKSIAAKAGFMQKAGNAVAPRAASLTSSQMGGVNNGFDSPTMSTAATSGS…
tr|A0A3B6IKX2|A0A3B6IKX2_WHEAT	TraesCS4B02G029200	Uncharacterized protein OS=Triticum aestivum OX=4565 PE=4 SV=1	1.6155	1.67510970798979|1.61767429469745|1.69055281289785|1.46927720069259|1.43409952478006|1.49531571436484|1.72869204104731|1.68527918984696|1.74352929129942	5.71414e-08	MAASPTASASGSAAAAAAAASEANDGPTLSVVTKRLRALRKKQNRIAQMEEAVAAGKTLNQEQKEVMRSKPTLAAVIDELERLRAPLAVAVAEEVSVAPAPAPAPAPEPSGSDSSVQDLLALVYFGTLFDVKPQSDFIATMVAREHERSSCITYDCVGDDTVDLLVEGDLDVVSAVAALAAARPASAVGVSHRDALQACAHHARLWLARADEPIHPGSSVTYAAVRAKLDRIMASDYYTAAAVGGGSYGAEGVQAQESMTASPEASAVEENLAAEGHKEEKEDSHATEIYNDHQSDSADVQNDREAPVNPPEEYPSVQAEQEKFDMEEQDERDAEPKEQQFQHPRRSHQNQRGGGRGRRGAYPNGRGGRGGGRGMGGGYQNGRGYQGGGGGYQGGGGGY…
tr|A0A3B6KKG1|A0A3B6KKG1_WHEAT	TraesCS5A02G247200	Glucose-6-phosphate isomerase OS=Triticum aestivum OX=4565 PE=3 SV=1	1.73091	1.56291730285252|1.81935497457998|1.88526928155654|1.23991217305733|1.4449125054265|1.49366944371705|1.84803536338284|2.16314866735549|2.1209515383476	2.6547e-05	MASISGAAAPPSSSSACRLRLRRQLLMRPSHLRLRAPHSIADLSRSSGSPHAPAPPLASRAPGQGGGAAVEKDPIKLWDRYVEWLYQHKQLGLFVDVSRMGFTDDFLLQMEPLMQRAFVAMGELEKGAIANPDEGRMVGHYWLRDPGLAPNSFLRTKIEKTVDHILAFSQDVVSGKIKPPSSQAGRFTQILSIGIGGSSLGPQFVSEALAPDNPPLKIRFIDNTDPAGIDHQIAQLGEELKSTLVIVISKSGGTPETRNGLLEVQKAFRDAGLDFSKQGVAITQENSLLDNTARIEGWLDRFPMFDWVGGRTSELSAVGLLPAALQGIDVKEMLVGAALMDEETRNTVVKENPAALLALSWYWATDGIGSKDMVVLPYKDSLLLLSRYLQQLVMESLGK…
tr|A0A3B6R826|A0A3B6R826_WHEAT	TraesCS7A02G065500	PCI domain-containing protein OS=Triticum aestivum OX=4565 PE=3 SV=1	1.57163	1.43709964786243|1.82430960272167|1.67779656185397|1.32786187391272|1.67619420448998|1.49041368846648|1.46307121071605|1.76877044875176|1.47911688169443	1.59271e-06	MDPKLVEVTQLFDRFKAAFKASNFDVCSTLLSQLKVLLTKFPSLPPLFQQTPNAVEELKLAREIYEQAVILSVKMEDQDAFERDFCQLKPYYMDTCGIIPPSSEEYPIMGANLLRLLVQNRIAEFHTELELLPAKALDNAYIKHGVELEQSFMEGAYNRVLSARQTAPHETYIYFMDLLVKTVRDEIAGCSEKGYDYLSINDAKQMFKFSSDKELQQYIAEEHPEWDVKDGRVLFQKAKESQPCKEIPAAPVINQTLGYARELERIV
tr|A0A3B6IPP5|A0A3B6IPP5_WHEAT	TraesCS4D02G133600	SOR_SNZ domain-containing protein OS=Triticum aestivum OX=4565 PE=3 SV=1	1.84848	1.88726531496192|2.01208787035515|1.51448865702797|1.79956735234837|1.94709766197392|1.45865395504676|2.08710181121015|2.23412890456745|1.69595408751695	1.4093e-06	MASDGVVALYGNNKAVVEPSAKPAAATFSVKVGLAQMLRGGVIMDVVTAEQARLAEEAGACAVMALERVPADIRAQGGVARMSDPALIRDIKRAVTIPVMAKARIGHFVEAQILEAIGVDYVDESEVLTLADEAHHINKHNFRVPFVCGCRDLGEALRRIREGAAMIRTKGEAGTGNVVEAVRHVRSVMGAVRALRNMDEDEVFSYAKQIAAPYDLVMQTKQLGRLPVVQFAAGGVATPADAALMMQLGCDGVFVGSGIFKSGDPARRARAIVQAVTHYSDPEILANVSAGLGEAMVGINLSDPGVERFAARSQ
tr|A0A3B5YWW1|A0A3B5YWW1_WHEAT	TraesCS1B02G210900	PCI domain-containing protein OS=Triticum aestivum OX=4565 PE=3 SV=1	1.66586	1.72413579496059|2.01099688712625|1.87565586238097|1.40472231941517|1.54649454887068|1.5268356899945|1.52108676834754|1.78510751539313|1.59766519255018	1.12212e-06	MALQYVEAQRQARPDLADWYADLADLYQRKLWHQLTLKLDQFLQIPAAQTGDTLIQLYNNFISDFETKINLLKLAQFAVIASRQYPDKDAAITFLEGIITKLRETRELRINEPILHVKMQIAAIHLDKGNHKECKNLLEEGKTTLDGMTDVDPTVHASFYWISSQYHKSLQEFAEFYKNALLYLAYTTVGSLSESFKLDLAFDLSLAALLGDNIYNFGELLAHPIINSLIGTKVEWVYHMLQAFNTGNLALYQELCGVHNAALSAQPALVQNEQKLLEKINILCLMEIIFSRPSEDRTIPLSVIAKQTKLSTSEVECLLMKSLSVHLIEGIIDEVDSTVHVSWVQPRVLGIPQVKALRERLDSWVGKVHTTLLSIEAETPDLVAA
tr|A0A3B5YS72|A0A3B5YS72_WHEAT	TraesCS1B02G073300	Protein ABIL1 OS=Triticum aestivum OX=4565 PE=3 SV=1	1.84246	2.31391175358002|2.10943024280255|1.76718286765314|1.4156886190412|1.29038271131444|1.08314661504702|2.47155881793073|2.27437142306582|1.85643398537498	0.000334607	MVEAAGPLRRRGGTMEEVQMEEAFIFSETIKDLKALRPQLYSAVEYFELAYTQEGGKQAVMTNLKEYAVKALVNTVDHLGSISFKVSSLVDQRFDEVAEANLRVSCIQQRAQAIQACVNREGLTQQSLVIAAPKYHKRYILPGDGSVPNAVPNFSEMNKVKSRTTQMHQAFRAAASAAQTKSKDKQASFRKLRSIARAPSQSARSSSPAQHPRFMPPSDTAIPTNRDKRSDSPIYSTTPLTRSGSLSKKSSLLKTSSVRVQVNQAGL
tr|A0A3B6Q8W4|A0A3B6Q8W4_WHEAT	TraesCS6D02G009100	Uncharacterized protein OS=Triticum aestivum OX=4565 PE=3 SV=1	2.15734	2.02084614889111|2.50143237250603|1.89973312938397|1.70071707088707|1.96005985586407|1.53414780438769|2.58482959120792|3.2360528992926|1.97828416588582	1.05978e-05	MASPFGGASTCGLKGATPSGFATRKQLSLVSPPLVSLPQRARPGRKCSFRVNAAKELYFNKDGSAIKKLQTGVNKLADLVGVTLGPKGRNVVLESKYGSPRIVNDGVTVAKEVELEDPVENIGAKLVRQAAAKTNDLAGDGTTTSVILAQGMIAEGVKIVAAGANPVQIARGIEKTTKALVGELRKMSKEVEDSELADVAAVSAGNNYEIGNMIAEAMSKVGRQGVVTLEEGKSAENNLYVVEGMQFDRGYISPYFVTDSEKMSVEYENCKLLLVDKKINNARDLITILEEAIKGAYPILIIAEDIEQEALATLVVNRLRGALKIAAIKAPGFGERKSQYLDDIATLTGGTVIREEIGLSLDKADKEVLGNAAKVVITKDSTTIVGDGTTQEEVTRRVT…
tr|V9P7D3|V9P7D3_WHEAT	TraesCS1D02G007400	LMW-m glutenin subunit 17 (Fragment) OS=Triticum aestivum OX=4565 GN=Glu-3 PE=4 SV=1	1.63131	1.6509894861334|1.44577950461936|1.57881298551328|1.49963815539447|1.32621658736868|1.50623261918424|2.02746476166348|1.71237573529539|1.93427998059733	5.7531e-06	METSCIPGLERPWQQQPLQQKETFPQQPPSSQQQQPFPQQPPFLQQQPSFSQQPLFSQKQQPVLPQQPAFSQQQQTVLPQQPAFSQQQHQQFPQQQIPVVQPSVLQQLNPCKVFLQQQCSHVAMSQRLARSQMWQQSSCHVMQQQCCQQLPQIPEQSRSEAIRAIVYSIILQEQQQGFVQPQQQQPQQSGQGVSQHQQQPQQQQQLGQCSFQQPQQLQQLGQQPQQQQIPQGIFLQPHQISQLEVMTSIALRTLPTMCGVNVPLYSSTTIMPFSIGTGVGAYKG
tr|A0A7H4LNA5|A0A7H4LNA5_WHEAT	TraesCS2D02G469500	Genome assembly, chromosome: II OS=Triticum aestivum OX=4565 GN=CAMPLR22A2D_LOCUS4722 PE=4 SV=1	1.99143	2.7869589899828|1.56624235680866|1.59963032859602|2.04056896950625|1.15763782700285|1.17804169324458|3.57448661903157|1.99815067316767|2.02115238521011	0.000958579	MVSFVPYMTATNIMLQIIQKLAKDDENYIRDDVDRKFKYQIRGKKYLLVVDGEVSSTEWKNILPNLKLGAKGSRIVHITQYKPEEPSVSYHHEIIKLECLGQKKAIELFHKRLLHIDVHDENLHEHHQVMHKITEGLPLGIVLLSGLVQTKESQSEWNNVFDYLKSNQSKRLHRIISMCFDDLPPELKCCFLYFAALPTNIKIESHILVCMWMAEGFLRPSVGKTMEKLGYIYLNELIARNLVKPVNMDEEDTSSAGKIFVAIQNKVHEFLQFQAQEASFVEVHSGDDIPTLTSARRLSLQNSVDEHVSLQNSTDKYSVLASYLPKLRSIFSHFEQDPKEPKEDKTYLCCSPQIRKISKWKRNKYIKSHIQGLLDRSEFLRVINLQGIEIGKRLPDEIG…
tr|A0A3B6IWU9|A0A3B6IWU9_WHEAT	TraesCS4B02G265700	PCI domain-containing protein OS=Triticum aestivum OX=4565 PE=3 SV=1	2.0775	1.71200483364362|2.83671403229282|2.2032250725503|1.38199823845956|2.25678173320999|1.77420822594002|1.69379093279657|2.83297314260677|2.00576951201313	2.30287e-05	MDVQMGEPQAAPPSAAVEAAPAPSTLHHLKEIAAVIEAGSLSKEVRRISRAVRLTVALRRRLAARDVSAFLAFALPVSSDAYARLTPLLPKEDEAEMDIDAAAPATQISIKHGLPEIEIYCSLLVLIFLIDQKKYDEAKACATGSIARLKNLNRRTVDVLASRLYFYYSYVYELTNTLAEIRGNLLGLHRMATLHHDELGQETLLNLLLRNYLHYNLYDQAEKLRSKAPRFEAHSNQQFCRYLFYLGKIRTIQLEYTDAKESLLQAARKAPAAARGFRIQCNKWAIIVRLLLGEIPERTVFMQKGMKEALAPYFELTNAVRIGDLELFRAVADKFASTFSADRTHNLIVRLRHNVIRTGLRNISISYSRISLADIAKKLRLDTENPVADAECIVTKAIR…
tr|A0A3B6JM30|A0A3B6JM30_WHEAT	TraesCS4D02G274300	Uncharacterized protein OS=Triticum aestivum OX=4565 PE=4 SV=1	1.53385	0.73534594174523|0.80998181132513|0.999280236061405|1.52032847984881|1.62472170809008|2.03804050164398|1.87345304385968|2.0830441080172|2.12042070112976	0.0341754	MPQMKNIHHTIFLVLQIHVHINQDPFKVFAMACKTTVVVAIACIFMLALLVSSAQGDCKGHAIKVECNNNDSCIKWCHYFGIPRGHCHIHSGGGYCVCDVSD
tr|A0A3B5Z296|A0A3B5Z296_WHEAT	TraesCS1B02G366300	Barwin domain-containing protein OS=Triticum aestivum OX=4565 PE=4 SV=1	1.57314	1.95043425170176|1.35242443209618|1.61813824925403|1.65191520811934|1.227701737911|1.46282564226937|1.90108382694747|1.36106031429514|1.63263883601167	2.88427e-05	MAGRMALAVVLLSAAAAAAAAQSASNVRATYNYYSPEKINWDLNAGMSYAWRSKYGWTAFCGPAGPTGQASCGKCLLVTNTATGAQITARIVDQCSNGGLDLDFDTVFSKIDTDGQGVAQGHLTVNYQFVDCGDN
tr|A0A3B6KFF3|A0A3B6KFF3_WHEAT	TraesCS5A02G168400	Protein phosphatase 2A structural subunit OS=Triticum aestivum OX=4565 PE=4 SV=1	2.33366	2.80555906178434|2.53622549969006|1.999833320843|2.52579518965498|2.31931944095978|1.82091398168739|2.64939292868032|2.41761358928137|1.92827995115163	1.8344e-07	MAMVDEPLYPIAVLIDELKNEDIQLRLNSIRRLSTIARALGEERTRKELIPFLSENNDDEDEVLLAMAEELGVFIPYVGGVEHAHVLLPPLETLSTVEETCVRDKAVESLCRIGAQMKENDIVDYFIAVVKRLAAGEWFTARVSSCGLFHIAYPSATDPLKTELRTIYGQLCQDDMPMVRRAAASNLGKFAATVEQSHLKTEIMSIFDDLTQDDQDSVRLLAVEGCAALGKLLEPQDCVAHILPVIVNFSQDKSWRVRYMVANQLYELCEAVGPEPTRADLVPAYVRLLRDNEAEVRIAAAGKVTKFCRILSPQLAIQHILPCVKELSSDSSQHVRSALASVIMGMAPVLGKDEFPDVRLNIISKLDQVNQVIGIDLLSQSLLPAIVELAEDRHWRVRL…
tr|A0A3B6JMX2|A0A3B6JMX2_WHEAT	TraesCS4D02G298100	Eukaryotic translation initiation factor 3 subunit K OS=Triticum aestivum OX=4565 PE=3 SV=1	1.57789	1.62579741154805|1.82250666627105|1.74383746974675|1.24034343688771|1.35976545581536|1.3664626737413|1.59345626860841|1.80862618707871|1.64019291216026	1.02869e-05	MANEQPAETYTVEELVAVNPYNPDILNDLEVFVNDQVSSKTYNLDANLSLLRLYQFEPERLSVQIVARILIKALMAMPAPDFSLCLFLIPEHVQMEEQFKTLIVLSHYLETGRFRQFWDEASKSRNILDVVPGFEQAIQSYAIHVLSLTYQKVPRPVLAEAINIEGLALDKFMEYHAANSGWVIEKGSRSQLIVLPRNEFNHPELKKNTADTVPFEHVTRIFPILS
tr|A0A3B6FI96|A0A3B6FI96_WHEAT	TraesCS3B02G153200	Carboxypeptidase OS=Triticum aestivum OX=4565 PE=3 SV=1	1.50678	1.55557313379349|1.60661744482537|1.60808991837883|1.30112495923756|1.36141871406626|1.35639659756144|1.54569799738527|1.59593718151388|1.63015975158954	7.24949e-07	MAAAVLLAAILALSPLPLSLASPSAAAAADRITRLPGQPPVNFSMYSGYVTVDAAAGRALFYWLIEAAVAKPESAPLVLWLNGGPGCSSVGYGASEELGAFRINADGRTLSINPYSWNKMANVLFLDAPAGVGYSYSNSSSDLLAPGDNKTAHDSYTFLVNWLERFPQYKYRDFYIAGESYGGHYVPQLSQLVYRNNKGVRKPILNFKGFMKLQLACEFDSSEHASDACNKIYDVAEAEEGPIDAYSIYTPTCKKTSLHRRRQIKGRRPWLPRGYDPCTEQYSTKYYNLPEVQKAFRANVTGIPYAWTGCSDVLFEYWKDSPRSMLPIYRELIAAGIRIWVFSGDADSVVPLTGTRYSIDALYLPTVTNWYPWYDEEEVAGWCQVYKGLTLVTIRGAGH…
tr|A0A3B6TLP3|A0A3B6TLP3_WHEAT	TraesCS7D02G134800	AAA domain-containing protein OS=Triticum aestivum OX=4565 PE=3 SV=1	1.80472	1.61136955872157|2.29949747662991|2.0948767604471|1.28659214348921|1.84638670753845|1.6824596839063|1.45897840475954|2.09884817120323|1.8635086083288	1.56165e-05	MSSPAPAAAAPMAVDDAEDDQMASMSVEDVGRASRLLDNETRVLKDELQRTNLEVETFESKTKENQEKIKLNKQLPYLVGNTVEVLEMNPEDEAEEDGANIDLDSQRKGKCVVLKTSTRQTIFLPVAGLVDPDTLKPGDLVGVNKDSYLIIDTLPSEYDSRVKAMELDEKPTEDYNDVGGLEEQIQELVEAIVLPMTHKDRFQKLGIRPPKGVLLYGPPGTGKTLMARACAAQTNATFLKLAGPQLVQMFIGDGAKLVRDAFQLAKEKAPCIIFIDEIDAIGTKRFDSEVSGDREVQRTMLELLNQLDGFSSDDRIKVIAATNHADILVPALLRSGRLDRKIEFPHPSEEARARILQIHSRKMSVNPDVNFEELARSTDDFNGAQLKAVCVEAGMLALR…
tr|A0A3B6DFJ1|A0A3B6DFJ1_WHEAT	TraesCS2D02G341500	PCI domain-containing protein OS=Triticum aestivum OX=4565 PE=4 SV=1	2.91006	2.42914893222513|3.83326404865966|3.20094665648699|2.11174899825068|3.30168474228322|2.78604290050929|2.25370700002328|3.5899147258698|2.6841061657568	3.80508e-07	MDGGGEEGNQQPQLVLAHKLFLLSQPDVDDLAKVGLRDDVLAAVKSDDMAALYESLAADGVLEMDAALLAEMRGRIEEETKKLDEKITDAEENLGESEVREAHLAKSLYFIRVGEKEKALEQLKVTEGKTVAVGQKMDLVFYTLQIGLFHMDFDLISKSVDKAKILFEEGGDWERKNRLKVYEGLYCMATRNFKKATSLFLDSVSTFTTYELFPYDTFIFYTVLTSVITLDRVSLKQKVVDAPEILAVISKVPHLSEFLNSLYNCQYKSFFVAFSGLTEQIKLDRYLQPHFRYFMREVRTVVYSQFLESYKSVTMEAMAASFGVTVDFIDQELSRFIAAGKLHCKIDKVAGVLETNRPDARNAFYQSTIKQGDFLLNRIQKLSRVIDL
tr|A0A3B6IWV7|A0A3B6IWV7_WHEAT	TraesCS4B02G340300	DUF2428 domain-containing protein OS=Triticum aestivum OX=4565 PE=4 SV=1	3.51483	2.9410784056626|3.49670573000024|2.95577421221885|3.79376497222829|4.57545038898214|3.85570324311912|3.12123672921443|3.74585758348397|3.14790134223582	6.41415e-09	MSSNWRSLQHRHRYTYTSVVFPKHYLEALPLVPAQVSASNFFAQLNNLISLLSTYAQIVVVKDFASAFVQFLSAPAISDDAVLAAAKLYLEILFFENSLPLHRVLISVLAKCNKFSALISSCFTLLCEEYGGSGVKAKKRFLVSRAALSLIGYPKLGFMNEAVEKSVEIMAWDVVAGLDGVIRDIDDGSRPSPVVMEQCQEAMSCMYYLLQRYPSKFTGLDKASAVFKSAVRTILTVLKSFAFSRDCLVASGVSFCAAIQVFMSPEQISWFISQGLFGIFPDHEDIKDLAAHDALSDFHLSEEIRDLSVLSRLCLLRGILTAIPRKALNVRQLHSNGSLWTVLYDGILPELCMHCENPIDRHFNFHALTVTQICLQQIKTSVLADFTDFTGDYKPFSRD…
tr|A0A3B5ZPK2|A0A3B5ZPK2_WHEAT	TraesCS1D02G029400	PUM-HD domain-containing protein OS=Triticum aestivum OX=4565 PE=4 SV=1	1.78733	2.24891692504759|1.90786619205301|1.50981078573947|2.01685508244593|1.6574383220671|1.33279166956369|2.17988191944786|1.86672142659446|1.36565174656672	2.38703e-05	MVTEMATRGGGDAVCGGGEEGERGDFELFRSGSAPPTVEGAMAMASGGGGEVLLDDELRADPAYQSYYYSNAHLNPRLPPPLLSKEDWRSAQHRLRSSSSSSAAAGLGGIGDGRRAPGDGLVSLPGIDHPRQRGFSGIFQEDSNQRDMDRQGANHNRNDFLDSSGMQYALHRETGAMSGLQRESNEQTMADIRNNELSSHAYASILGPSLSRSASPDPELVRRVPSPCLPPIGVKVGAYDKKSNGGSSSFRRSSSAVGEPDDLVAALSGMNLSSSRAGNGQAMDQSKLYQDVDNANRFLFDQTSGNQQHSFMKRPEQGHFRAPEGYSANSSMMRNQMNGGNFTSSDNSLVGSGYASPRIGARSPGGTLSSRQNLAGASNYLGYNGVGSPTGAASLQMPI…
tr|A0A3B6G297|A0A3B6G297_WHEAT	TraesCS3B02G575500	Uncharacterized protein OS=Triticum aestivum OX=4565 PE=4 SV=1	1.50809	1.7252698609683|1.76315142928846|1.554659964797|1.35258431747026|1.39259155262736|1.22968898023015|1.54549429418989|1.5980999721745|1.4113082945032	6.8383e-06	MSWWWAGAVGAVKKRQDERAAAAEPTFQSVALILGSTGIVGTSLLDILPRDDTPGGPWKVYAVSRRAPPGWSTPPPSPAVTHLQLDLADAAAVRDALAPLTDVTHVFYAAWSSHETEDRNREVNAGMLRNVLSVVVPGCPALAHVCLQTGRKHYVGPFEAIGKIPAPDPPYTEDTPRLDHPNFYYDLEDVLFHHVSGRDGAVTWSVHRPTVIFGFSPRSAMNVMGSLCVYAAICRKEGTTLRWPGCKVAWEGFTDASDADLVAEHEIWAAVDPFAKNEAFNCSNGDVFKWKQLWPMLAERFGVEWAGYEGEDSRFSLADAMAGKEAVWTEILQENELVTTELEEITSWWFVDAMFSIDIEHLDNMNKSKEHGFLGFRNTVNSFNAWIDKMKASKVVP
tr|A0A3B6LQ01|A0A3B6LQ01_WHEAT	TraesCS5B02G296200	STI1 domain-containing protein OS=Triticum aestivum OX=4565 PE=4 SV=1	1.8223	1.86863023138325|1.80728311299019|1.82383600877088|1.69292765706014|1.65211616254293|1.66393199249909|2.0042620329454|1.95171720731358|1.93600060462871	7.15582e-09	MASDPNKDSKSEGLSEAKKGASPTAGAGLPSPFDFSNMSSLLNDPSIREMAEQIASDPVFNQMAEQLQKSAQGAGEQGVPNLDPQAYMETMTQVMQNPQFMSMAERLGNTLMQDPAMSSMLENLTSPAHKEQLEERMARIKDDPSLKPILDEIERGGPSAMVKYWNDPEILQKIGQAMSLNFPVDAATSTVLSGPQETDEEGEDDDESIVHNTASVGDAEGLKKALDGGANKDEEDLEGRRALHFACGYGELKCAEILLEAGAAVDALDKNKNTPLHYAAGYGRKECVDLLLKHGAAVTLQNLDGKTPIEVAKLNSQGEVVKLLEQDVFL
tr|A0A077RZI5|A0A077RZI5_WHEAT	TraesCS3B02G207500	Uncharacterized protein OS=Triticum aestivum OX=4565 GN=TRAES_3BF074200070CFD_c1 PE=3 SV=1	1.59019	1.83817051790051|1.66038343362002|1.71470480392403|1.45879095953278|1.3218780974898|1.36022793746161|1.76156087390203|1.59248294313149|1.60354385919776	2.13238e-06	MDGGGGMGPVGGGVGGMVGPVGVGGGGGGSDVELVSKTLQFEHKLFYFDLKENPRGRYLKISEKTSTTRSTIIVPIAGVAWFLDLFDYYIRTDERDVFSKELRLDTKVFYFDIGENKRGRYLKVSEASVNRNRSTIIVPAGSSGEEGWEAFRNVLLEINDEASRLYVLPNHPSQQHLEPPERLPGLSDDVGAGFIAGHGSQSASVPEVDVDGPPIEEFSGMGLSKVIRADQKRFFFDLGSNNRGHYLRISEVAGADRSSIILPLSGLKQFHEMVGHFVDIMKDRLEGMTGANVRTVEPSQR
tr|A0A3B6JQ60|A0A3B6JQ60_WHEAT	TraesCS4D02G350200	PCI domain-containing protein OS=Triticum aestivum OX=4565 PE=4 SV=1	1.60454	1.73692554136657|1.85120333921975|1.49481282286747|1.60344502947131|1.70704138952908|1.39506925243559|1.57599150082524|1.73379505365571|1.34259985263198	1.1531e-06	MDVDCEVSAAAAAAVTNGLGGGEQAAAAPVSADQLDVEAYAAQYSGRTRVARLLFIAERCGVEAIQLEALRMAHDEARAREDTVLYLDAVLKINGRLGPRYRHDQAWVDSVNRRAEQRKEKLETELNGYRTNLIKESIRMGYNDIGDFFYAHGHLSEAFKSYIRTRDYCTTSKHIVQMCMHVILVSIELGQFAHVTNYVSKAEQTPDTLDAVIVAKLRAAAGLANLETKKYKLAARKFLETGPELGSNYSEVIAPQDVAVYGALCALASFDRSELKSKVIDNINFRNFLELVPEVRELVNDFYASRYGSCLEHLEKLKPNLLLDIHLREHLGTLYNDIRHKAIIQYTLPFISVDLNTMASAFKSSVSMLEKELAALITENKIQARIDSHNKILYARHAD…
tr|Q0WYE6|Q0WYE6_WHEAT	TraesCS2D02G546600	RD21A-like cysteine protease (Fragment) OS=Triticum aestivum OX=4565 GN=RDCP PE=2 SV=1	1.78396	2.69843075685585|1.56861429034602|1.62990042657455|2.39846393592736|1.41405641289226|1.46312674300255|2.21575274601963|1.30016432491013|1.36709961150772	0.000306552	ELPESIDWREKGAVAPVKNQGQCGSCWAFSAVSTVESINQIVTGEMVTLSEQELVECDINGGSSGCNGGLMDDAFEFIIKNGGIDTEDDYPYKAVDGRCDVLRKNAKVVSIDGFEDVPENDEKSLQKAVAHQPVSVAIEAGGREFQLYHSGVFSGRCGTQLDHGVVAVGYGTENGKDYWIVRNS
tr|W5CXF2|W5CXF2_WHEAT	TraesCS3A02G186600	Uncharacterized protein OS=Triticum aestivum OX=4565 GN=TRAES_3BF029700060CFD_c1 PE=4 SV=1	2.21222	2.0841018575957|2.67165862223483|2.55992410663339|1.51494586331542|1.96242160687461|1.87725355304422|2.06093715130634|2.66685154773774|2.51189919316592	2.04607e-06	MAAAAPADAKAEAAKMDLLEDDDEFEEFEIDQEWDDKEDGNEAVQQWEDDWDDDDVNDDFSLQLRKELEGGNTQKS
tr|A0A3B6HR37|A0A3B6HR37_WHEAT	TraesCS4A02G115300	Uncharacterized protein OS=Triticum aestivum OX=4565 PE=4 SV=1	1.76833	1.57158503834072|1.87751850091311|1.93965866259306|1.27221240476518|1.52414093715912|1.57691664677048|1.80921922310327|2.18177319182031|2.1619895241567	1.36269e-05	MLSGDVPPNQTVYFRNLNEKVKKEELKRSLYALCSQYGRIVDVVALKTHKLRGQAWVAFSEITAATNAFRGLQDFDFYGKKMRVQYAKTKSDCFAKADGSYAPKEKRKKQEEKAAEKKRRTEDGQQPGASAPVAPSNGTGHQPSRFAKPPQEPAAPPNNILFLQNMPDQTTSMMLQILFQQYPGFREVRMIEAKPGIAFVEYEDENQSMVAMEALQGFKISPENPMAISYAKK
tr|C0KEI2|C0KEI2_WHEAT	0	Omega-gliadin (Fragment) OS=Triticum aestivum OX=4565 PE=4 SV=1	3.20259	3.03443089762304|3.44727157559566|2.69570838554565|3.50429750457415|3.45566844830868|3.17172936619467|3.24541062060751|3.68929333137019|2.57953515383079	2.47201e-09	ARQLNPSEQELQSPQQAVPKEQSYPQQPQQPFPQPQQPTPIQPQQSFPQQPQQPFPQPQQQLPLQPQQPFPQPQQPIPQQPQQSYPQQPQRPQQQFLQQPQQIIPQQTQQPFPLQPQQPFPQQPQRPFAQQPEQIISQQPFPLQPQQLFSQPQQPFPQQPGQIINQQPQQPSPLQPQQPFSQQPQRPQQPFPQQPQQIIPPQPQQPFSLQPQQPVPQQPQRPFGQQPEQIISQRPQQPFPLQPKQPFSQPQQPFPQQPGQIIPQQPQQPFPLQPQQPFPQQPEQIISQQPQQPFPLQPQQPSHQQPQLPFPQPQQPFVVVE
tr|A0A3B6LIS6|A0A3B6LIS6_WHEAT	TraesCS5B02G116300	Dihydrolipoamide acetyltransferase component of pyruvate dehydrogenase complex OS=Triticum aestivum OX=4565 PE=3 SV=1	1.70933	1.8737832500527|2.11059356320793|1.95928816348795|1.42830935088109|1.60284520848274|1.52420458118263|1.66031691250601|1.61593803326424|1.60873161901132	1.54196e-06	MAGLLHLHSTLLPSASLLRQRGGAQAVPRRRRACRVEAKIREIFMPALSSTMTEGKIVAWNAAEGDRLAKGDPVVVVESDKADMDVETFHNGFLAAVLVPAGESAPVGSAIALLAESEEEIPLARSQAANFSSSAAASPPAPQETVAQEASPAPPPPPPPAPVAVSAPAPPSPATQGGARVVASPYAKKLAKELSVDLFAVTGSGPGGRVVAKDVEAAAAAPKKAAPVPAARQDVPLGSTVPFTTMQGAVSKNMVESLAVPAFRVGYTITTDALDALYKKIKAKGVTMTALLAKATAMALVQHPVVNSSCRDGQSFTYNSSINIAVAVAIDGGLITPVLQDADKLDIYSLSRKWKELVDKARAKQLQPQEYNSGTFTLSNLGMFGVDRFDAILPPGTGA…
tr|A0A0G3F720|A0A0G3F720_WHEAT	TraesCS1D02G063500	Endosperm transfer cell specific PR60 OS=Triticum aestivum OX=4565 PE=2 SV=1	1.63004	1.64478942626707|1.44990318171123|1.71334574914734|1.26343125033052|1.2137226835173|1.3499089666162|2.05544679978957|1.83208168208211|2.14777480467812	0.000138817	MAKLMCLCFIILTIAVVVSADECEGDRQEMIKQCAKYQQWPANPKVNPSDACCAVWQKANIPCLCAGVTKEKEKIWCMEKVAYVANFCKKPFPHGYKCGSYTFPPLA
tr|A0A0C4BKA8|A0A0C4BKA8_WHEAT	TraesCS6B02G207100	AAA domain-containing protein OS=Triticum aestivum OX=4565 PE=3 SV=1	2.03701	1.96081677830812|2.37840671667161|2.33165280915653|1.62249678869104|1.96417170946589|1.93521627431149|1.83102906610621|2.23924210675635|2.07008033641033	1.27295e-07	MATVAMDISKPPPAASGDESAKGARGGGEGLRQYYLQHIHDLQLQIRQKTHNLNRLEAQRNDLNSRVRMLREELQLLQEPGSYVGEVVKVMGKSKVLVKVHPEGKYVVDIDKSIDITKITPSTRVALRNDSYMLHLVLPSKVDPLVNLMKVEKVPDSTYDMIGGLDQQIKEIKEVIELPIKHPELFESLGIAQPKGVLLYGPPGTGKTLLARAVAHHTDCTFIRVSGSELVQKYIGEGSRMVRELFVMAREHAPSIIFMDEIDSIGSARMESGTGNGDSEVQRTMLELLNQLDGFEASNKIKVLMATNRIDILDQALLRPGRIDRKIEFPNPNEDSRGDILKIHSRRMNLMRGIDLKKIAGKMNGASGAELKAVCTEAGMFALRERRVHVTQEDFEMAV…
tr|A0A3B6C475|A0A3B6C475_WHEAT	TraesCS2B02G240000	Uncharacterized protein OS=Triticum aestivum OX=4565 PE=3 SV=1	1.8694	2.32689946425789|0.997161556241139|1.59718866271401|3.01798267783945|1.29864593946592|2.0134454925425|2.68411670624067|1.1660979638929|1.723067139297	0.00219363	MAQTMASMTGLSQGVRLPGPTGRRASRFTVRASSAEAEAAGRRAVLGLMASGVVGSAFAQVVHAGTVAAIKVGPPPPLSGGLPGTDNSDEARDFDLPLKNRFYLQPLPPAEAAVRAKESAQDILNLKPLIDKKQWPYVMNDLRLRASYLRYDLKTVISSKTTKEEKKDLKDLTGKLFATLDGLDHAAKIKSPTEAEKYYGETKTVLGDVLAKLG
tr|A0A3B5YU22|A0A3B5YU22_WHEAT	TraesCS1B02G135300	PLAT domain-containing protein OS=Triticum aestivum OX=4565 PE=4 SV=1	1.62299	1.66064551409114|2.06978661249028|1.6738143929512|1.3500815298253|1.70353819595786|1.37388506226433|1.45520498234524|1.83081674567738|1.48912486308244	7.55993e-06	MAPFCAAQEAAVRTCTYTVKVKTSCASPARTSDAVSVAFGDAYRNEAYGARLPSAPGGRAFERCGTDTFRVSGVCGYGVGYLYLRRAGRDGWAPEWVQVTEPGPGAGEKPATFYFGAPLPDGVWYGHNRCPKAKAKAAAAARTNTTSAAASPLG
tr|A0A3B6C4P9|A0A3B6C4P9_WHEAT	TraesCS2B02G253600	PCI domain-containing protein OS=Triticum aestivum OX=4565 PE=3 SV=1	1.68765	1.81429075414475|2.15716838514603|1.57240220922679|1.72556658056438|1.68391874988614|1.60411663965656|1.49891723322879|1.79696551231726|1.33549330147141	3.06186e-06	MAMDAERRQAELIEQFSAQAAALSSAPQLAALVLEATSHPALFAFSELLTLPALSKLTGTQYASSLDLLRLFAYGTLKDYKSNSSALPALLPDQARKLKQLSVLTLAESTKVLPYDQLMQELDVSNVRELEDFLINECMYSGIVRGKLDQLRRCFEVQFAAGRDLTPDQLTNMIETLSDWLGTSDNLLHHIQEKIKWADTTSELNKKHQKEFEDRVEEAKKSVKKLNNVSRQTMTYGGMTTFSLNLEE
